# Supplementary material for: A Natural Glucan from Black Bean Inhibits Cancer Cell Proliferation via PI3K-Akt and MAPK Pathway
Source: Molecules. 2023 Feb 19;28(4):1971. doi: 10.3390/molecules28041971 (PMC9961350; doi:10.3390/molecules28041971)
Supplement: Supplementary file 1 [file molecules-28-01971-s001.zip › Table S1.xlsx]

## Sheet: HELAHDW_vs_HELAPB
Table S1. 160 significant differential genes (FDR ≤ 0.05) in BBWPW-treated versus untreated cases.
	baseMean	log2FoldChange	lfcSE	stat	pvalue	padj	symbol
ENSG00000143442.22	397.895	-3.34222	0.339905	-9.8328	8.13261e-23	7.92319e-19	POGZ
ENSG00000183020.14	457.323	3.02477	0.309437	9.77507	1.44058e-22	7.92319e-19	AP2A2
ENSG00000176720.6	107.645	-4.572	0.489635	-9.33756	9.85771e-21	3.6145e-17	BOK
ENSG00000196233.14	152.098	-5.24053	0.624644	-8.38963	4.87692e-17	1.34115e-13	LCOR
ENSG00000117859.19	362.09	2.86753	0.354964	8.07838	6.56306e-16	1.44387e-12	OSBPL9
ENSG00000136848.17	141.16	2.26771	0.284016	7.98445	1.41155e-15	2.58784e-12	DAB2IP
ENSG00000196236.13	155.757	-4.99487	0.629209	-7.93833	2.04919e-15	3.22015e-12	XPNPEP3
ENSG00000149182.15	214.577	-2.04841	0.264582	-7.74204	9.78375e-15	1.34527e-11	ARFGAP2
ENSG00000164187.7	81.5837	2.96874	0.45247	6.5612	5.33769e-11	6.52384e-08	LMBRD2
ENSG00000062725.10	180.009	-2.42349	0.374456	-6.47202	9.66982e-11	1.06368e-07	APPBP2
ENSG00000141429.13	118.576	-2.17885	0.352226	-6.18595	6.17307e-10	5.65865e-07	GALNT1
ENSG00000213465.8	112.13	2.57675	0.415853	6.1963	5.78045e-10	5.65865e-07	ARL2
ENSG00000106692.15	52.7883	-2.853	0.477495	-5.97493	2.30192e-09	1.94778e-06	FKTN
ENSG00000085224.23	311.491	1.77189	0.301213	5.8825	4.04103e-09	3.1751e-06	ATRX
ENSG00000174485.16	68.4397	-3.38978	0.579251	-5.85201	4.85665e-09	3.56154e-06	DENND4A
ENSG00000119396.11	272.749	-1.32524	0.230172	-5.75761	8.53141e-09	5.86534e-06	RAB14
ENSG00000123143.13	188.147	1.82541	0.319416	5.71483	1.09816e-08	6.71099e-06	PKN1
ENSG00000132510.11	224.494	-4.76051	0.832608	-5.71758	1.0805e-08	6.71099e-06	KDM6B
ENSG00000122390.19	91.2426	1.81944	0.323108	5.63105	1.79113e-08	1.03697e-05	NAA60
ENSG00000204580.13	221.833	2.52666	0.455214	5.55048	2.84883e-08	1.56685e-05	DDR1
ENSG00000062716.13	345.463	1.21907	0.221217	5.51075	3.57305e-08	1.8716e-05	VMP1
ENSG00000196072.12	66.3576	3.02367	0.567234	5.33055	9.79142e-08	4.89571e-05	BLOC1S2
ENSG00000012232.9	104.271	-2.02892	0.38696	-5.24324	1.57782e-07	7.54607e-05	EXTL3
ENSG00000232573.1	291.551	-7.6431	1.47471	-5.18277	2.18616e-07	0.000100199	RPL3P4
ENSG00000110047.18	293.861	1.27096	0.247044	5.14467	2.67985e-07	0.000113378	EHD1
ENSG00000135766.9	339.622	-1.45993	0.283479	-5.15005	2.60421e-07	0.000113378	EGLN1
ENSG00000135632.12	136.28	2.17749	0.426406	5.10662	3.27973e-07	0.000133619	SMYD5
ENSG00000120694.20	478.368	-0.946418	0.188184	-5.02922	4.92476e-07	0.000193473	HSPH1
ENSG00000144426.18	34.5698	3.78131	0.759303	4.97998	6.35916e-07	0.00024121	NBEAL1
ENSG00000144747.17	112.157	-2.79267	0.568956	-4.90842	9.1813e-07	0.000336648	TMF1
ENSG00000166479.10	215.889	1.45833	0.298112	4.89189	9.98715e-07	0.000354383	TMX3
ENSG00000101849.17	142.07	-1.33862	0.277498	-4.82391	1.40771e-06	0.000483901	TBL1X
ENSG00000110514.19	118.145	-1.56466	0.324853	-4.81651	1.46091e-06	0.00048697	MADD
ENSG00000233024.7	37.1364	-3.32978	0.698615	-4.76627	1.87671e-06	0.000607172	NA
ENSG00000179195.16	235.95	1.25768	0.265622	4.73485	2.19213e-06	0.000688954	ZNF664
ENSG00000203965.13	35.5164	2.48531	0.527614	4.71047	2.47152e-06	0.000755187	EFCAB7
ENSG00000185499.16	64.6604	2.62475	0.564218	4.65202	3.28706e-06	0.000977235	MUC1
ENSG00000213639.10	389.134	-0.917977	0.198524	-4.624	3.76403e-06	0.00108959	PPP1CB
ENSG00000060656.20	38.2589	-2.48001	0.537704	-4.61222	3.98396e-06	0.00112368	PTPRU
ENSG00000076555.15	48.7225	-2.80403	0.61216	-4.58055	4.63749e-06	0.00127531	ACACB
ENSG00000070018.9	144.912	-2.07201	0.453042	-4.57354	4.79543e-06	0.00128658	LRP6
ENSG00000169180.12	400.22	-1.08887	0.238993	-4.55607	5.21192e-06	0.00136503	XPO6
ENSG00000286070.2	30.7301	6.97801	1.53433	4.54793	5.4175e-06	0.00138587	GGT1
ENSG00000118965.16	85.3674	-2.0577	0.453996	-4.53242	5.83113e-06	0.00144109	WDR35
ENSG00000177731.16	538.622	-0.842687	0.186019	-4.53011	5.89538e-06	0.00144109	FLII
ENSG00000179912.20	272.477	4.13788	0.915958	4.51754	6.25618e-06	0.00149604	R3HDM2
ENSG00000156787.17	91.7168	1.72194	0.382307	4.50409	6.66593e-06	0.00153348	TBC1D31
ENSG00000161265.15	39.0708	3.41207	0.757687	4.50327	6.69156e-06	0.00153348	U2AF1L4
ENSG00000113648.16	466.369	-0.907989	0.202333	-4.4876	7.2031e-06	0.00161702	MACROH2A1
ENSG00000147099.21	41.6255	-2.01841	0.453143	-4.45424	8.41919e-06	0.0018395	HDAC8
ENSG00000161203.13	744.605	0.694385	0.15599	4.45147	8.52861e-06	0.0018395	AP2M1
ENSG00000168172.9	120.513	-1.86211	0.421548	-4.41732	9.99324e-06	0.00211396	HOOK3
ENSG00000009413.16	145.125	-1.54569	0.352717	-4.38224	1.17467e-05	0.002438	REV3L
ENSG00000183258.12	253.972	1.14514	0.264518	4.32917	1.49674e-05	0.00304891	DDX41
ENSG00000128294.16	108.713	2.83749	0.661998	4.28626	1.81708e-05	0.00363416	TPST2
ENSG00000180900.20	454.544	-1.35341	0.316711	-4.27332	1.92585e-05	0.00378292	SCRIB
ENSG00000167106.12	84.966	1.7906	0.423911	4.224	2.40007e-05	0.00463172	FAM102A
ENSG00000072803.18	207.691	1.31296	0.313492	4.18818	2.81202e-05	0.00533315	FBXW11
ENSG00000138758.12	254.135	-2.41877	0.578987	-4.17759	2.9461e-05	0.00549273	SEPTIN11
ENSG00000118257.17	212.07	5.99664	1.44289	4.156	3.23865e-05	0.00593753	NRP2
ENSG00000102287.19	117.419	-2.22391	0.536378	-4.14616	3.38097e-05	0.00609684	GABRE
ENSG00000039319.17	64.311	-1.83424	0.443539	-4.13547	3.54223e-05	0.0062846	ZFYVE16
ENSG00000107164.16	331.828	1.26972	0.307551	4.12848	3.65164e-05	0.00637588	FUBP3
ENSG00000165895.19	15.0831	5.15406	1.25009	4.12296	3.74027e-05	0.00642858	ARHGAP42
ENSG00000067167.8	554.514	-0.847853	0.206097	-4.11385	3.89109e-05	0.00658492	TRAM1
ENSG00000182004.13	179.767	1.51436	0.369008	4.10387	4.06295e-05	0.00677158	SNRPE
ENSG00000170035.16	87.0837	1.74154	0.425519	4.09273	4.2632e-05	0.00699928	UBE2E3
ENSG00000088256.9	134.027	-1.13545	0.278132	-4.08243	4.45677e-05	0.00720948	GNA11
ENSG00000136738.15	155.462	1.70515	0.420034	4.05955	4.91672e-05	0.00783825	STAM
ENSG00000160007.19	331.898	1.18866	0.295468	4.02298	5.74664e-05	0.00903043	ARHGAP35
ENSG00000125827.9	24.3384	-2.14661	0.534441	-4.01655	5.90574e-05	0.00914973	TMX4
ENSG00000184903.10	45.1009	3.31629	0.831446	3.98858	6.64699e-05	0.0101551	IMMP2L
ENSG00000114030.13	167.473	1.05108	0.264861	3.96842	7.23496e-05	0.0107547	KPNA1
ENSG00000280987.4	197.939	1.02074	0.257206	3.96858	7.23034e-05	0.0107547	MATR3
ENSG00000163625.16	127.921	3.69785	0.934685	3.95625	7.61355e-05	0.0111665	WDFY3
ENSG00000133226.17	294.354	-1.03194	0.26244	-3.93209	8.42099e-05	0.0121883	SRRM1
ENSG00000077157.22	83.5663	-4.82527	1.22879	-3.92685	8.60672e-05	0.0122953	PPP1R12B
ENSG00000122912.15	43.4058	-3.46629	0.883985	-3.92121	8.81055e-05	0.0124251	SLC25A16
ENSG00000143614.10	239.229	3.7796	0.965	3.91669	8.97735e-05	0.0125001	GATAD2B
ENSG00000099804.9	360.299	-1.17291	0.300334	-3.90536	9.40856e-05	0.0128015	CDC34
ENSG00000150867.14	49.5638	1.8324	0.469257	3.9049	9.42653e-05	0.0128015	PIP4K2A
ENSG00000134982.17	106.967	1.72883	0.44353	3.89788	9.70375e-05	0.0130172	APC
ENSG00000258643.6	14.7625	6.29393	1.61628	3.89408	9.85713e-05	0.0130637	BCL2L2-PABPN1
ENSG00000040933.16	48.9866	-1.98558	0.51068	-3.88811	0.000101026	0.01321	INPP4A
ENSG00000153815.17	170.613	1.70653	0.439194	3.8856	0.000102078	0.01321	CMIP
ENSG00000085999.13	121.941	-1.79071	0.462861	-3.8688	0.000109374	0.0139897	RAD54L
ENSG00000163050.18	97.9021	2.27012	0.588826	3.85534	0.00011557	0.0143008	COQ8A
ENSG00000175215.11	182.997	1.04167	0.2699	3.85947	0.000113633	0.0143008	CTDSP2
ENSG00000277791.5	409.211	0.907005	0.235277	3.85505	0.000115707	0.0143008	PSMB3
ENSG00000119414.12	133.537	-1.21541	0.316976	-3.8344	0.000125873	0.0153845	PPP6C
ENSG00000178607.17	84.6359	-2.83318	0.739563	-3.83089	0.000127679	0.0154337	ERN1
ENSG00000138614.15	118.619	-1.2562	0.32899	-3.81836	0.000134343	0.0160628	INTS14
ENSG00000163527.10	837.306	0.841603	0.220915	3.80963	0.000139177	0.0162484	STT3B
ENSG00000168883.20	156.583	0.95144	0.249602	3.81184	0.000137938	0.0162484	USP39
ENSG00000283149.1	63.9329	5.77241	1.51603	3.80759	0.000140327	0.0162484	NA
ENSG00000163374.20	87.7236	1.28028	0.336891	3.80027	0.000144537	0.0165616	YY1AP1
ENSG00000144677.15	54.3089	1.53216	0.405768	3.77595	0.000159398	0.0178916	CTDSPL
ENSG00000280893.1	20.0586	-6.2567	1.65645	-3.77719	0.000158611	0.0178916	NA
ENSG00000136319.12	29.7708	-2.4974	0.662202	-3.77135	0.000162365	0.0180405	TTC5
ENSG00000138778.13	114.374	-2.14165	0.569039	-3.76363	0.000167462	0.0184208	CENPE
ENSG00000214655.11	208.705	-1.31537	0.350259	-3.75543	0.000173041	0.0188461	ZSWIM8
ENSG00000184445.12	118.462	-2.22763	0.594981	-3.74404	0.000181084	0.0195286	KNTC1
ENSG00000112096.19	729.755	-0.600045	0.160947	-3.72821	0.000192844	0.0205646	SOD2
ENSG00000272333.7	161.824	1.02632	0.275437	3.72615	0.000194429	0.0205646	KMT2B
ENSG00000099995.19	320.402	-0.959545	0.259642	-3.69565	0.000219326	0.0223487	SF3A1
ENSG00000135446.17	828.715	0.809305	0.218935	3.69655	0.000218551	0.0223487	CDK4
ENSG00000140598.15	189.139	4.53433	1.22698	3.69554	0.000219424	0.0223487	EFL1
ENSG00000198131.14	82.2125	1.38621	0.375048	3.69609	0.000218949	0.0223487	ZNF544
ENSG00000159842.15	314.51	2.59916	0.703896	3.69253	0.000222034	0.0224071	ABR
ENSG00000107679.14	92.6811	-1.87576	0.510441	-3.67478	0.000238051	0.0238051	PLEKHA1
ENSG00000080986.13	138.269	-1.15823	0.31615	-3.66353	0.000248759	0.0246518	NDC80
ENSG00000120254.16	174.078	-0.867374	0.237479	-3.65242	0.000259785	0.0255146	MTHFD1L
ENSG00000114126.18	101.198	2.02907	0.556939	3.64326	0.000269205	0.0262058	TFDP2
ENSG00000152556.17	176.214	0.864399	0.237792	3.6351	0.000277868	0.0264474	PFKM
ENSG00000188549.12	26.4344	2.6187	0.720581	3.63415	0.0002789	0.0264474	CCDC9B
ENSG00000204406.14	34.3472	-5.28016	1.45158	-3.63754	0.000275258	0.0264474	MBD5
ENSG00000101966.13	168.232	-1.15534	0.318334	-3.62933	0.000284156	0.0267155	XIAP
ENSG00000006125.18	456.085	0.73164	0.203124	3.60195	0.000315844	0.0284778	AP2B1
ENSG00000111786.9	211.433	0.871182	0.241806	3.60281	0.000314792	0.0284778	SRSF9
ENSG00000134243.12	28.8719	-2.64298	0.733479	-3.60335	0.000314143	0.0284778	SORT1
ENSG00000140307.11	203.056	-0.934987	0.258982	-3.61023	0.000305921	0.0284778	GTF2A2
ENSG00000187239.17	83.3968	-1.96534	0.545512	-3.60274	0.00031488	0.0284778	FNBP1
ENSG00000186951.16	41.5118	3.84951	1.07092	3.5946	0.000324895	0.0290556	PPARA
ENSG00000100003.18	14.747	3.77875	1.0528	3.58925	0.000331634	0.0293247	SEC14L2
ENSG00000142197.12	32.1433	2.34325	0.65346	3.58591	0.000335901	0.0293247	DOP1B
ENSG00000176209.12	15.1188	-3.38352	0.943448	-3.58633	0.000335364	0.0293247	SMIM19
ENSG00000174705.13	232.761	1.10316	0.308005	3.58164	0.000341443	0.0295738	SH3PXD2B
ENSG00000041988.15	52.3081	1.69598	0.47401	3.57795	0.000346305	0.0297606	THAP3
ENSG00000198909.8	111.878	1.28313	0.358944	3.57475	0.000350568	0.0298934	MAP3K3
ENSG00000140262.18	280.716	-2.51996	0.705566	-3.57154	0.000354888	0.0300289	TCF12
ENSG00000169249.13	47.3442	-2.35074	0.659328	-3.56536	0.000363359	0.0305111	ZRSR2
ENSG00000132561.14	207.777	1.83041	0.515383	3.55155	0.000382976	0.0319147	MATN2
ENSG00000149313.11	77.6577	-1.31522	0.370753	-3.54742	0.000389017	0.0321744	AASDHPPT
ENSG00000138592.14	158.183	0.922648	0.261156	3.53294	0.000410973	0.0337366	USP8
ENSG00000039560.14	185.204	3.96869	1.1275	3.51989	0.000431719	0.0349185	RAI14
ENSG00000172113.10	120.46	-1.37011	0.389105	-3.52118	0.000429634	0.0349185	NME6
ENSG00000154188.10	47.3846	-2.10533	0.603454	-3.4888	0.0004852	0.0383971	ANGPT1
ENSG00000157227.14	174.246	3.49233	1.00046	3.49073	0.000481696	0.0383971	MMP14
ENSG00000198522.14	71.5613	1.46221	0.419018	3.48963	0.000483698	0.0383971	GPN1
ENSG00000075275.18	91.2272	-2.16237	0.6202	-3.48656	0.000489267	0.0384424	CELSR1
ENSG00000074356.17	443.185	-2.59961	0.750776	-3.46256	0.000535054	0.0417418	NCBP3
ENSG00000177200.17	113.915	1.75948	0.508702	3.45877	0.000542649	0.0420362	CHD9
ENSG00000114166.8	30.1721	2.70023	0.781882	3.4535	0.000553365	0.0425666	KAT2B
ENSG00000134452.20	203.83	-1.2513	0.362607	-3.45085	0.000558822	0.0426878	FBH1
ENSG00000105792.19	18.9525	5.21215	1.5122	3.44673	0.000567408	0.0427499	CFAP69
ENSG00000196498.13	274.496	-0.733722	0.212784	-3.4482	0.00056433	0.0427499	NCOR2
ENSG00000164039.15	14.3407	-2.64032	0.766862	-3.44301	0.000575271	0.0430475	BDH2
ENSG00000204104.12	42.1003	1.66642	0.484514	3.43936	0.000583099	0.0433385	TRAF3IP1
ENSG00000069702.11	63.4575	1.20566	0.351062	3.43433	0.000594018	0.0438537	TGFBR3
ENSG00000117143.13	234.695	2.4326	0.713475	3.40951	0.000650805	0.0474096	UAP1
ENSG00000130363.13	23.5784	2.16935	0.636112	3.41033	0.000648848	0.0474096	RSPH3
ENSG00000121039.10	92.8181	1.4546	0.427066	3.40602	0.000659165	0.0477027	RDH10
ENSG00000112787.14	341.596	-1.54058	0.452588	-3.40394	0.000664215	0.047754	FBRSL1
ENSG00000172466.16	69.9373	-1.45217	0.427321	-3.39831	0.000678032	0.0482762	ZNF24
ENSG00000228630.5	46.5591	-2.16489	0.637215	-3.39742	0.000680256	0.0482762	HOTAIR
ENSG00000113360.17	423.275	-0.953438	0.280934	-3.39382	0.000689251	0.048601	DROSHA
ENSG00000100266.19	170.744	-0.847555	0.250101	-3.38885	0.000701865	0.048864	PACSIN2
ENSG00000150995.20	280.167	-2.75543	0.812779	-3.39013	0.000698586	0.048864	ITPR1
ENSG00000151208.17	241.777	1.49058	0.440633	3.38282	0.000717464	0.0496359	DLG5
ENSG00000134987.12	181.726	1.0389	0.307376	3.37992	0.000725078	0.0498491	WDR36
