# Supplementary material for: A Natural Glucan from Black Bean Inhibits Cancer Cell Proliferation via PI3K-Akt and MAPK Pathway
Source: Molecules. 2023 Feb 19;28(4):1971. doi: 10.3390/molecules28041971 (PMC9961350; doi:10.3390/molecules28041971)
Supplement: Supplementary file 1 [file molecules-28-01971-s001.zip › Table S2.xlsx]

## Sheet: target_res
Table S2. Potential targets predicted by the target module in TMNP
	description	log2FoldChange_CS	log2FoldChange_NCS	log2FoldChange_Pvalue	log2FoldChange_FDR
AATF	AATF	0.21	3.21	0	0
ACACA	ACACA	0.24	3.76	0	0
ACACB	ACACB	0.19	3.07	0	0
ACE	ACE	-0.21	-3.24	0	0
ACVR1	ACVR1	0.2	3.14	0	0
ADC	ADC	0.23	3.42	0	0
ADCK4	ADCK4	-0.2	-3.29	0	0
ADH6	ADH6	-0.26	-3.82	0	0
ADK	ADK	0.24	3.74	0	0
ADO	ADO	0.32	4.51	0	0
ADORA3	ADORA3	0.21	3.13	0	0
ADRA2A	ADRA2A	0.19	3.08	0	0
AGT	AGT	0.26	3.9	0	0
AIFM1	AIFM1	-0.21	-3.32	0	0
AKAP8L	AKAP8L	0.23	3.43	0	0
AKR1A1	AKR1A1	-0.24	-3.71	0	0
AKT1	AKT1	0.23	3.32	0	0
AKT2	AKT2	0.22	3.32	0	0
ALDH2	ALDH2	-0.23	-3.66	0	0
ALG5	ALG5	0.25	3.72	0	0
ANO10	ANO10	0.25	3.7	0	0
AP2A2	AP2A2	0.22	3.34	0	0
ARF4	ARF4	-0.25	-3.89	0	0
ARHGAP35	ARHGAP35	0.21	3.14	0	0
ARHGDIB	ARHGDIB	-0.22	-3.51	0	0
ARNT	ARNT	0.21	3.2	0	0
ARNT2	ARNT2	0.25	3.72	0	0
ARNTL	ARNTL	0.26	3.87	0	0
ARPC1A	ARPC1A	0.19	3.08	0	0
ASF1A	ASF1A	0.22	3.45	0	0
ASF1B	ASF1B	-0.22	-3.58	0	0
ASGR2	ASGR2	0.25	3.84	0	0
ATG3	ATG3	0.22	3.32	0	0
ATG5	ATG5	-0.19	-3.19	0	0
ATG7	ATG7	0.21	3.08	0	0
ATOX1	ATOX1	0.25	3.82	0	0
ATP2A2	ATP2A2	0.27	4.05	0	0
ATP2B1	ATP2B1	0.22	3.37	0	0
ATP2C1	ATP2C1	0.21	3.32	0	0
ATP5D	ATP5D	0.19	3.06	0	0
AXIN2	AXIN2	0.21	3.23	0	0
B3GNT1	B3GNT1	0.24	3.57	0	0
B4GALT1	B4GALT1	0.2	3.12	0	0
B4GALT4	B4GALT4	0.2	3.06	0	0
BCKDHA	BCKDHA	0.19	3.06	0	0
BCL7B	BCL7B	0.28	4.41	0	0
BDKRB2	BDKRB2	0.2	3.18	0	0
BID	BID	0.2	3.11	0	0
BIRC5	BIRC5	0.2	3.1	0	0
BIRC6	BIRC6	0.22	3.61	0	0
BLVRA	BLVRA	0.23	3.52	0	0
BMP2	BMP2	0.22	3.66	0	0
BMPR1A	BMPR1A	0.22	3.36	0	0
BNIP3	BNIP3	0.22	3.4	0	0
BRCA1	BRCA1	-0.22	-3.27	0	0
BRPF3	BRPF3	0.3	4.65	0	0
CACNA1G	CACNA1G	0.2	3.17	0	0
CACNA2D3	CACNA2D3	-0.2	-3.3	0	0
CALML6	CALML6	-0.25	-3.74	0	0
CALR	CALR	0.21	3.22	0	0
CALU	CALU	-0.22	-3.46	0	0
CALY	CALY	-0.22	-3.41	0	0
CAMKK2	CAMKK2	0.21	3.21	0	0
CASP14	CASP14	0.21	3.11	0	0
CASP8	CASP8	0.22	3.29	0	0
CATSPER1	CATSPER1	0.26	4.11	0	0
CATSPER2	CATSPER2	0.26	4	0	0
CATSPER3	CATSPER3	0.26	4.11	0	0
CATSPER4	CATSPER4	0.26	4.16	0	0
CBS	CBS	-0.22	-3.18	0	0
CCKAR	CCKAR	-0.23	-3.55	0	0
CCNL1	CCNL1	-0.23	-3.6	0	0
CD83	CD83	0.26	4.08	0	0
CDC25A	CDC25A	0.2	3.17	0	0
CDC42	CDC42	-0.2	-3.42	0	0
CDIPT	CDIPT	-0.2	-3.26	0	0
CDK2	CDK2	0.25	3.73	0	0
CDK4	CDK4	0.21	3.13	0	0
CDK5	CDK5	0.22	3.37	0	0
CDK6	CDK6	0.22	3.5	0	0
CDK8	CDK8	0.22	3.36	0	0
CDK9	CDK9	0.19	3.08	0	0
CDKAL1	CDKAL1	-0.22	-3.56	0	0
CEBPA	CEBPA	0.25	3.64	0	0
CFLAR	CFLAR	0.21	3.19	0	0
CHAC1	CHAC1	0.21	3.51	0	0
CHEK2	CHEK2	0.22	3.38	0	0
CHIC2	CHIC2	0.23	3.49	0	0
CHMP2A	CHMP2A	0.2	3.11	0	0
CHRM3	CHRM3	0.22	3.24	0	0
CHRM5	CHRM5	0.21	3.17	0	0
CHRNB1	CHRNB1	0.22	3.37	0	0
CHRNB2	CHRNB2	0.18	3.08	0.01	0
CHRND	CHRND	0.22	3.39	0	0
CHRNE	CHRNE	0.22	3.4	0	0
CHRNG	CHRNG	0.22	3.29	0	0
CKS1B	CKS1B	-0.27	-3.92	0	0
CLK1	CLK1	-0.22	-3.46	0	0
CLK3	CLK3	0.27	4.18	0	0
CLPP	CLPP	0.21	3.27	0	0
CNOT4	CNOT4	0.2	3.22	0	0
COL13A1	COL13A1	0.22	3.18	0	0
CREG1	CREG1	0.26	3.95	0	0
CRY1	CRY1	-0.26	-3.84	0	0
CSAD	CSAD	0.3	4.58	0	0
CSF2RB	CSF2RB	0.2	3.07	0	0
CSNK1E	CSNK1E	0.22	3.43	0	0
CSNK1G2	CSNK1G2	0.26	3.76	0	0
CTNNB1	CTNNB1	-0.28	-4.29	0	0
CTSH	CTSH	0.2	3.19	0	0
CXCL2	CXCL2	0.24	3.54	0	0
CYCS	CYCS	0.28	4.28	0	0
CYP11B2	CYP11B2	0.22	3.38	0	0
CYP3A7	CYP3A7	0.22	3.39	0	0
DAGLA	DAGLA	0.26	4.06	0	0
DAGLB	DAGLB	0.26	4.08	0	0
DCK	DCK	0.28	4.49	0	0
DDB2	DDB2	-0.24	-3.55	0	0
DGCR14	DGCR14	-0.21	-3.3	0	0
DGKD	DGKD	-0.22	-3.72	0	0
DHCR7	DHCR7	0.24	3.55	0	0
DHRS2	DHRS2	0.25	3.74	0	0
DHX16	DHX16	0.24	3.58	0	0
DIDO1	DIDO1	0.28	4.47	0	0
DKC1	DKC1	-0.29	-4.64	0	0
DLGAP5	DLGAP5	0.21	3.3	0	0
DNA2	DNA2	-0.26	-4.12	0	0
DNAJC1	DNAJC1	0.23	3.51	0	0
DRD4	DRD4	0.2	3.22	0	0
DTNA	DTNA	0.24	3.57	0	0
DVL2	DVL2	0.21	3.55	0	0
DYNLL2	DYNLL2	0.22	3.37	0	0
DYRK3	DYRK3	0.25	3.69	0	0
EBP	EBP	0.21	3.18	0	0
ECSIT	ECSIT	0.2	3.32	0	0
EGF	EGF	0.21	3.4	0	0
EGFR	EGFR	0.22	3.27	0	0
EHHADH	EHHADH	-0.23	-3.71	0	0
EIF3H	EIF3H	0.19	3.16	0	0
EIF4G1	EIF4G1	-0.22	-3.33	0	0
ELF1	ELF1	-0.22	-3.51	0	0
ELK1	ELK1	-0.27	-4.02	0	0
EMD	EMD	-0.2	-3.25	0	0
ENOSF1	ENOSF1	0.25	3.96	0	0
ENTPD2	ENTPD2	0.2	3.19	0	0
ENTPD6	ENTPD6	0.2	3.13	0	0
EPAS1	EPAS1	0.23	3.28	0	0
EPC1	EPC1	0.22	3.27	0	0
EPN2	EPN2	0.26	3.99	0	0
EPO	EPO	0.2	3.1	0	0
ERCC6L	ERCC6L	0.27	3.75	0	0
ERG	ERG	0.22	3.46	0	0
ERH	ERH	0.2	3.21	0	0
ESRRB	ESRRB	0.21	3.3	0	0
ETV4	ETV4	-0.21	-3.2	0	0
F2RL1	F2RL1	-0.22	-3.42	0	0
F9	F9	0.24	3.52	0	0
FADS3	FADS3	-0.22	-3.44	0	0
FAS	FAS	0.28	4.29	0	0
FBXO7	FBXO7	0.23	3.55	0	0
FDPS	FDPS	0.24	3.98	0	0
FGA	FGA	0.23	3.5	0	0
FGFR3	FGFR3	-0.21	-3.3	0	0
FOLR1	FOLR1	0.2	3.3	0	0
FOXR1	FOXR1	0.24	3.53	0	0
FPR1	FPR1	0.21	3.19	0.01	0
FRAT1	FRAT1	0.21	3.36	0	0
FTL	FTL	0.2	3.07	0	0
GAA	GAA	0.21	3.16	0	0
GALNS	GALNS	-0.27	-4.06	0	0
GAMT	GAMT	-0.21	-3.19	0	0
GAS6	GAS6	-0.21	-3.34	0	0
GATA3	GATA3	0.22	3.17	0	0
GATAD1	GATAD1	0.22	3.41	0	0
GCA	GCA	0.24	3.83	0	0
GCH1	GCH1	0.23	3.47	0	0
GDI1	GDI1	-0.23	-3.41	0	0
GDPD5	GDPD5	-0.23	-3.65	0	0
GGCX	GGCX	0.2	3.13	0	0
GGH	GGH	0.2	3.19	0	0
GLRA2	GLRA2	0.26	4.24	0	0
GLRA3	GLRA3	0.26	4.01	0	0
GMPS	GMPS	0.27	3.85	0	0
GNE	GNE	0.25	3.61	0	0
GPC1	GPC1	0.22	3.55	0	0
GPI	GPI	0.25	3.83	0	0
GPR123	GPR123	-0.24	-3.4	0	0
GPR141	GPR141	0.2	3.19	0	0
GPR152	GPR152	0.24	3.81	0	0
GPR153	GPR153	0.26	3.92	0	0
GPR83	GPR83	-0.22	-3.32	0	0
GPRC6A	GPRC6A	0.22	3.41	0	0
GPX1	GPX1	-0.23	-3.63	0	0
GPX2	GPX2	0.23	3.46	0	0
GRK5	GRK5	0.22	3.43	0	0
GRM2	GRM2	-0.21	-3.19	0	0
GRM3	GRM3	-0.22	-3.44	0	0
GSDMB	GSDMB	-0.27	-4	0	0
GUK1	GUK1	-0.23	-3.5	0	0
GYG1	GYG1	-0.26	-3.86	0	0
HAL	HAL	0.22	3.4	0	0
HCAR2	HCAR2	-0.21	-3.21	0	0
HCRTR2	HCRTR2	0.19	3.11	0	0
HK1	HK1	-0.24	-3.66	0	0
HLA-DMA	HLA-DMA	0.3	4.56	0	0
HLA-DQA1	HLA-DQA1	0.24	3.61	0	0
HLA-DRB3	HLA-DRB3	0.2	3.12	0	0
HMGCS1	HMGCS1	0.22	3.25	0	0
HNF1B	HNF1B	0.21	3.2	0	0
HORMAD2	HORMAD2	-0.23	-3.69	0	0
HOXA1	HOXA1	0.27	4.13	0	0
HOXA9	HOXA9	0.21	3.23	0	0
HOXB4	HOXB4	-0.25	-4.05	0	0
HPD	HPD	0.25	3.79	0	0
HRH3	HRH3	-0.22	-3.31	0	0
HS2ST1	HS2ST1	0.26	3.9	0	0
HSPA2	HSPA2	-0.25	-3.88	0	0
HSPA9	HSPA9	0.28	4.37	0	0
HTATIP2	HTATIP2	0.21	3.33	0	0
HTATSF1	HTATSF1	-0.22	-3.59	0	0
HYOU1	HYOU1	0.29	4.23	0	0
IARS2	IARS2	0.21	3.49	0	0
ICAM1	ICAM1	0.25	3.87	0	0
ID1	ID1	0.19	3.24	0	0
IDE	IDE	0.2	3.17	0	0
IGBP1	IGBP1	-0.29	-4.31	0	0
IGF1	IGF1	0.2	3.12	0	0
IGFBP5	IGFBP5	0.21	3.1	0	0
IGFBP7	IGFBP7	-0.23	-3.41	0	0
IKBKB	IKBKB	0.27	4.18	0	0
IL15	IL15	0.25	3.73	0	0
IL1R1	IL1R1	0.2	3.08	0	0
IL6ST	IL6ST	0.2	3.23	0	0
ILK	ILK	0.22	3.41	0	0
ING3	ING3	0.23	3.54	0	0
INPP5D	INPP5D	0.24	3.76	0	0
IRS1	IRS1	0.29	4.38	0	0
ISX	ISX	0.21	3.53	0	0
ITGA2	ITGA2	0.22	3.43	0	0
KCND2	KCND2	-0.25	-3.73	0	0
KCNJ10	KCNJ10	0.21	3.42	0	0
KCNJ12	KCNJ12	-0.22	-3.49	0	0
KCNK1	KCNK1	0.21	3.36	0	0
KCNQ2	KCNQ2	0.23	3.49	0	0
KCNQ4	KCNQ4	0.23	3.51	0	0
KDM5A	KDM5A	-0.21	-3.31	0	0
KIAA0196	KIAA0196	0.23	3.6	0	0
KIAA0317	KIAA0317	-0.21	-3.24	0	0
KIF11	KIF11	0.26	3.82	0	0
KLK6	KLK6	-0.25	-3.73	0	0
KNG1	KNG1	-0.24	-3.62	0	0
KREMEN1	KREMEN1	0.23	3.32	0	0
KRT25	KRT25	0.26	4.1	0	0
LAMB1	LAMB1	0.22	3.55	0	0
LIAS	LIAS	0.26	3.87	0	0
LIPH	LIPH	0.24	3.78	0	0
LMNA	LMNA	-0.24	-3.87	0	0
LPAR5	LPAR5	0.24	3.66	0	0
LRRC18	LRRC18	-0.22	-3.33	0	0
LRRK2	LRRK2	0.21	3.19	0	0
LRSAM1	LRSAM1	0.29	4.48	0	0
LTA4H	LTA4H	-0.21	-3.24	0	0
LTBR	LTBR	0.22	3.4	0	0
MACF1	MACF1	0.21	3.22	0	0
MAD2L1BP	MAD2L1BP	0.2	3.22	0	0
MAP3K14	MAP3K14	0.22	3.28	0	0
MAP3K2	MAP3K2	-0.21	-3.26	0	0
MAP7	MAP7	0.28	4.23	0	0
MAPK10	MAPK10	0.21	3.26	0	0
MAPK12	MAPK12	0.23	3.65	0	0
MAPK8IP1	MAPK8IP1	0.22	3.55	0	0
MAPKAPK5	MAPKAPK5	0.28	3.83	0	0
MBNL1	MBNL1	0.22	3.33	0	0
MCL1	MCL1	0.2	3.41	0	0
MCM5	MCM5	-0.2	-3.23	0	0
MCOLN1	MCOLN1	-0.24	-3.62	0	0
MED12L	MED12L	0.22	3.63	0	0
MED21	MED21	0.21	3.28	0	0
MED28	MED28	0.21	3.08	0	0
MED7	MED7	-0.23	-3.33	0	0
MEN1	MEN1	0.22	3.7	0	0
MFHAS1	MFHAS1	0.22	3.25	0	0
MGAT1	MGAT1	0.23	3.71	0	0
MGST2	MGST2	0.2	3.11	0	0
MMP14	MMP14	0.2	3.1	0	0
MMP7	MMP7	-0.25	-3.76	0	0
MNAT1	MNAT1	0.21	3.15	0	0
MTA3	MTA3	-0.24	-3.6	0	0
MTERFD1	MTERFD1	0.21	3.37	0	0
MTNR1A	MTNR1A	-0.2	-3.37	0	0
MXD3	MXD3	-0.21	-3.38	0	0
MYBL2	MYBL2	0.22	3.22	0	0
MYCN	MYCN	0.2	3.29	0	0
MYD88	MYD88	0.21	3.41	0	0
MYLK	MYLK	0.19	3.27	0	0
MYNN	MYNN	-0.21	-3.37	0	0
NAB2	NAB2	0.29	4.71	0	0
NARFL	NARFL	0.22	3.34	0	0
NARS	NARS	0.21	3.27	0	0
NAT1	NAT1	-0.28	-4.27	0	0
NCOA2	NCOA2	0.26	3.92	0	0
NDUFA5	NDUFA5	0.24	3.68	0	0
NDUFA9	NDUFA9	-0.25	-3.79	0	0
NEK6	NEK6	-0.23	-3.56	0	0
NET1	NET1	0.26	3.92	0	0
NFKB1	NFKB1	0.25	3.98	0	0
NFKBIB	NFKBIB	0.2	3.19	0	0
NFYB	NFYB	0.22	3.5	0	0
NKX2-3	NKX2-3	0.21	3.17	0	0
NME9	NME9	0.3	4.56	0	0
NMI	NMI	-0.22	-3.31	0	0
NOL3	NOL3	0.23	3.31	0	0
NOSIP	NOSIP	0.22	3.48	0	0
NOX1	NOX1	0.2	3.23	0	0
NPC1L1	NPC1L1	0.29	4.47	0	0
NPEPL1	NPEPL1	0.22	3.31	0	0
NPY1R	NPY1R	0.21	3.48	0	0
NQO1	NQO1	0.2	3.06	0	0
NR1H4	NR1H4	0.21	3.36	0	0
NR2C2	NR2C2	-0.21	-3.24	0	0
NR5A2	NR5A2	0.22	3.74	0	0
NRBP1	NRBP1	0.22	3.49	0	0
NT5C2	NT5C2	0.23	3.39	0	0
O3FAR1	O3FAR1	-0.24	-3.7	0	0
OAZ1	OAZ1	0.25	3.7	0	0
OPA1	OPA1	0.22	3.37	0	0
OR5W2	OR5W2	0.25	3.75	0	0
ORC1	ORC1	-0.23	-3.65	0	0
OVOL2	OVOL2	0.2	3.07	0	0
P4HTM	P4HTM	0.24	3.87	0	0
PC	PC	0.2	3.06	0	0
PCGF3	PCGF3	-0.25	-3.68	0	0
PCSK7	PCSK7	-0.26	-4.15	0	0
PDPK1	PDPK1	0.21	3.31	0	0
PGRMC1	PGRMC1	-0.21	-3.27	0	0
PHF16	PHF16	-0.21	-3.36	0	0
PHYH	PHYH	0.24	3.53	0	0
PI4KAP2	PI4KAP2	0.22	3.3	0	0
PIAS1	PIAS1	-0.29	-4.38	0	0
PIAS3	PIAS3	-0.21	-3.4	0	0
PIK3R4	PIK3R4	0.21	3.11	0	0
PIM1	PIM1	0.29	4.44	0	0
PIP4K2C	PIP4K2C	0.21	3.23	0	0
PJA2	PJA2	0.24	3.36	0	0
PKN2	PKN2	0.22	3.49	0	0
PLA2G2D	PLA2G2D	0.23	3.48	0	0
PLA2G4A	PLA2G4A	0.32	5.22	0	0
PLCL1	PLCL1	0.23	3.29	0	0
PLXNA1	PLXNA1	0.2	3.07	0	0
PNPO	PNPO	0.24	3.78	0	0
POLD4	POLD4	0.23	3.74	0	0
POLR2A	POLR2A	0.26	3.94	0	0
POLR2C	POLR2C	-0.27	-4.27	0	0
POLRMT	POLRMT	0.2	3.21	0	0
PPIB	PPIB	-0.23	-3.68	0	0
PPP2R3A	PPP2R3A	0.25	3.99	0	0
PPT1	PPT1	0.22	3.32	0	0
PRDX1	PRDX1	-0.23	-3.45	0	0
PRDX5	PRDX5	0.2	3.21	0	0
PRKCA	PRKCA	0.23	3.64	0	0
PRKCD	PRKCD	0.24	3.59	0	0
PRKCI	PRKCI	0.23	3.43	0	0
PRKD2	PRKD2	0.21	3.29	0	0
PRMT2	PRMT2	-0.29	-4.4	0	0
PROC	PROC	0.24	3.49	0	0
PROCR	PROCR	0.24	4.07	0	0
PROKR1	PROKR1	-0.23	-3.54	0	0
PRPF4	PRPF4	0.21	3.28	0	0
PSMA3	PSMA3	0.23	3.51	0	0
PSMB7	PSMB7	0.22	3.25	0	0
PSMB8	PSMB8	-0.21	-3.23	0	0
PTGFR	PTGFR	0.24	3.69	0	0
PTRF	PTRF	0.21	3.13	0	0
PTTG1	PTTG1	0.22	3.43	0	0
PYCR1	PYCR1	0.2	3.1	0	0
QPRT	QPRT	0.21	3.1	0	0
RAC1	RAC1	0.22	3.43	0	0
RANBP9	RANBP9	0.22	3.26	0	0
RAP1A	RAP1A	0.25	3.88	0	0
RARB	RARB	-0.23	-3.32	0	0
RASSF2	RASSF2	0.25	3.94	0	0
RBCK1	RBCK1	0.23	3.61	0	0
RBMX	RBMX	0.25	3.67	0	0
RCCD1	RCCD1	-0.2	-3.2	0	0
RFC2	RFC2	0.24	3.83	0	0
RFX5	RFX5	0.22	3.38	0	0
RFXANK	RFXANK	-0.24	-3.64	0	0
RGS19	RGS19	0.21	3.27	0	0
RNASE4	RNASE4	-0.26	-3.91	0	0
RNF125	RNF125	-0.21	-3.32	0	0
RNF166	RNF166	-0.22	-3.72	0	0
RNF5	RNF5	-0.21	-3.44	0	0
ROCK2	ROCK2	0.22	3.54	0	0
ROS1	ROS1	0.23	3.41	0	0
RPS14	RPS14	0.21	3.28	0	0
RPS19	RPS19	-0.22	-3.28	0	0
RTEL1	RTEL1	-0.22	-3.28	0	0
RUVBL2	RUVBL2	0.24	3.5	0	0
S100Z	S100Z	-0.21	-3.38	0	0
SCCPDH	SCCPDH	0.28	4.25	0	0
SCN10A	SCN10A	0.2	3.06	0	0
SCN9A	SCN9A	0.21	3.24	0	0
SDHD	SDHD	0.23	3.52	0	0
SEC24D	SEC24D	0.21	3.15	0	0
SERINC3	SERINC3	0.22	3.43	0	0
SERPINB5	SERPINB5	0.21	3.15	0	0
SGK1	SGK1	-0.24	-3.59	0	0
SIAH2	SIAH2	0.23	3.52	0	0
SIRT2	SIRT2	0.21	3.23	0	0
SIRT3	SIRT3	0.22	3.29	0	0
SLC1A5	SLC1A5	-0.22	-3.3	0	0
SLC22A5	SLC22A5	-0.24	-3.52	0	0
SLC39A6	SLC39A6	-0.22	-3.4	0	0
SNF8	SNF8	0.26	4.41	0	0
SOAT1	SOAT1	0.22	3.57	0	0
SOD1	SOD1	0.28	4.47	0	0
SPAG4	SPAG4	0.2	3.12	0	0
SPHK2	SPHK2	0.22	3.08	0	0
SPIC	SPIC	0.22	3.75	0	0
SPP1	SPP1	0.25	3.84	0	0
SPTLC2	SPTLC2	0.31	4.98	0	0
SRM	SRM	0.22	3.45	0	0
SRPRB	SRPRB	0.21	3.32	0	0
SSTR1	SSTR1	0.24	3.58	0	0
SSTR2	SSTR2	0.24	3.6	0	0
SSTR3	SSTR3	0.24	3.83	0	0
SSTR4	SSTR4	0.21	3.36	0	0
SSTR5	SSTR5	0.24	3.64	0	0
ST3GAL5	ST3GAL5	0.22	3.4	0	0
ST7	ST7	0.29	4.21	0	0
STAM	STAM	0.21	3.26	0	0
STK36	STK36	-0.21	-3.23	0	0
STK38	STK38	-0.24	-3.6	0	0
STK39	STK39	0.21	3.34	0	0
STRN4	STRN4	0.24	3.78	0	0
STX4	STX4	-0.21	-3.25	0	0
SUCLA2	SUCLA2	0.2	3.21	0	0
SUCLG2	SUCLG2	0.24	3.83	0	0
ABCG2	ABCG2	-0.21	-3.05	0	0.01
ACSL3	ACSL3	0.19	2.8	0	0.01
ADCY9	ADCY9	-0.19	-2.9	0.01	0.01
ADORA1	ADORA1	0.19	2.87	0	0.01
ADRA1A	ADRA1A	0.18	2.91	0	0.01
ADRA2C	ADRA2C	0.18	2.84	0.01	0.01
AKAP11	AKAP11	0.22	3.03	0	0.01
AKT3	AKT3	0.19	3.02	0	0.01
ALDH1A2	ALDH1A2	0.19	2.91	0	0.01
ALDOC	ALDOC	-0.21	-3.15	0	0.01
ALOX12	ALOX12	-0.18	-2.89	0	0.01
AMIGO3	AMIGO3	0.18	2.81	0	0.01
ANKRD10	ANKRD10	0.19	2.89	0	0.01
ANKRD37	ANKRD37	-0.2	-2.92	0	0.01
AOX1	AOX1	0.17	2.81	0.01	0.01
ARG2	ARG2	0.2	3.06	0	0.01
ARGLU1	ARGLU1	0.18	2.8	0	0.01
ARPC3	ARPC3	0.19	2.97	0	0.01
ASMTL	ASMTL	-0.2	-3.04	0	0.01
ATP5H	ATP5H	-0.18	-2.93	0	0.01
ATP6V1D	ATP6V1D	0.18	2.94	0	0.01
AURKB	AURKB	0.19	2.99	0	0.01
BAG6	BAG6	-0.2	-3.1	0	0.01
BATF3	BATF3	-0.19	-2.97	0.01	0.01
BLOC1S1	BLOC1S1	0.19	3.03	0	0.01
BRAP	BRAP	0.2	3	0	0.01
BRCA2	BRCA2	0.19	2.82	0	0.01
BRD2	BRD2	0.19	2.85	0	0.01
BRD8	BRD8	-0.19	-3.02	0	0.01
BTK	BTK	-0.18	-2.99	0	0.01
BUB1B	BUB1B	-0.19	-2.99	0	0.01
C2CD2	C2CD2	-0.22	-3.12	0	0.01
C3	C3	-0.19	-3	0	0.01
CA6	CA6	0.2	3	0	0.01
CA7	CA7	-0.2	-3.02	0	0.01
CACNA1I	CACNA1I	0.19	2.97	0	0.01
CACNA2D1	CACNA2D1	-0.19	-2.94	0	0.01
CAMK2D	CAMK2D	0.19	3.03	0	0.01
CARS	CARS	0.19	2.83	0	0.01
CBR3	CBR3	0.19	2.81	0	0.01
CCDC86	CCDC86	-0.21	-3.06	0	0.01
CCND1	CCND1	-0.19	-2.91	0	0.01
CCNE1	CCNE1	-0.19	-3.01	0	0.01
CCNE2	CCNE2	0.19	3.03	0	0.01
CD24	CD24	-0.19	-3	0	0.01
CDC7	CDC7	0.19	2.81	0	0.01
CEP72	CEP72	0.19	2.94	0	0.01
CETN2	CETN2	0.21	3.04	0	0.01
CHKB	CHKB	0.18	2.8	0.01	0.01
CHRNA6	CHRNA6	-0.21	-3.08	0	0.01
CLASRP	CLASRP	-0.19	-3.07	0	0.01
CNNM2	CNNM2	-0.2	-2.93	0	0.01
COG4	COG4	0.19	3.03	0	0.01
CPT2	CPT2	0.19	2.99	0	0.01
CRYZ	CRYZ	0.19	2.96	0.01	0.01
CSDA	CSDA	-0.18	-2.96	0	0.01
CYB5B	CYB5B	-0.2	-3.11	0	0.01
CYC1	CYC1	-0.19	-3.06	0	0.01
CYP11A1	CYP11A1	-0.2	-3	0	0.01
CYP11B1	CYP11B1	-0.2	-2.89	0	0.01
CYP2A6	CYP2A6	0.2	2.98	0	0.01
CYP2B6	CYP2B6	0.18	2.88	0	0.01
DCTN6	DCTN6	-0.2	-3.05	0	0.01
DECR1	DECR1	-0.2	-2.94	0	0.01
DNAJB9	DNAJB9	0.2	2.9	0	0.01
DRD3	DRD3	0.19	2.98	0	0.01
DTX3L	DTX3L	-0.21	-3.11	0	0.01
DUT	DUT	0.18	2.83	0	0.01
DYNLL1	DYNLL1	0.19	2.91	0	0.01
EED	EED	-0.2	-2.94	0	0.01
EHF	EHF	-0.2	-3.13	0	0.01
EIF2AK3	EIF2AK3	0.2	3.05	0	0.01
EIF3J	EIF3J	-0.2	-3.14	0	0.01
EIF4A2	EIF4A2	0.19	2.98	0	0.01
EIF5A	EIF5A	-0.2	-3.16	0	0.01
ELK3	ELK3	-0.17	-2.86	0.01	0.01
ENTPD1	ENTPD1	0.2	2.96	0	0.01
ENTPD3	ENTPD3	0.17	2.82	0	0.01
ERCC5	ERCC5	0.19	2.94	0.01	0.01
EXOSC8	EXOSC8	0.2	3.05	0	0.01
EXT1	EXT1	-0.2	-2.89	0	0.01
EXT2	EXT2	-0.2	-2.93	0	0.01
F2R	F2R	0.2	2.95	0	0.01
FAM120A	FAM120A	0.19	3.02	0	0.01
FBXO21	FBXO21	-0.18	-3.09	0	0.01
FGFR1OP	FGFR1OP	-0.18	-2.89	0	0.01
FKBP14	FKBP14	-0.19	-2.89	0	0.01
FOXN3	FOXN3	-0.2	-3.04	0	0.01
FTSJ1	FTSJ1	-0.21	-3.13	0	0.01
FUS	FUS	-0.21	-2.91	0	0.01
FZD5	FZD5	0.2	3.02	0	0.01
G2E3	G2E3	0.19	2.96	0	0.01
GABBR1	GABBR1	-0.21	-3.09	0	0.01
GABBR2	GABBR2	0.19	2.88	0	0.01
GABRA4	GABRA4	0.19	2.83	0	0.01
GATA1	GATA1	-0.18	-2.87	0	0.01
GATA2	GATA2	-0.21	-3.1	0	0.01
GATA6	GATA6	-0.19	-2.94	0	0.01
GBF1	GBF1	0.19	2.8	0	0.01
GBGT1	GBGT1	-0.21	-3.14	0	0.01
GBP2	GBP2	-0.19	-3.01	0	0.01
GGCT	GGCT	0.19	2.91	0	0.01
GNAI2	GNAI2	0.18	2.86	0	0.01
GPR172A	GPR172A	0.2	2.88	0	0.01
GPR37	GPR37	-0.2	-3.04	0	0.01
GPX7	GPX7	0.19	3.04	0	0.01
GRIA3	GRIA3	0.19	2.95	0	0.01
GRIA4	GRIA4	0.19	2.93	0	0.01
GRPR	GRPR	-0.19	-2.94	0	0.01
GSTP1	GSTP1	-0.2	-3.03	0	0.01
GTF2F2	GTF2F2	-0.18	-2.86	0.01	0.01
GTF3C2	GTF3C2	-0.2	-3	0	0.01
HADH	HADH	0.19	2.87	0	0.01
HLA-A	HLA-A	0.19	2.86	0	0.01
HMGB3	HMGB3	0.2	3.03	0	0.01
HOXB2	HOXB2	-0.19	-3.04	0	0.01
HS3ST3A1	HS3ST3A1	0.19	2.96	0	0.01
HSD17B1	HSD17B1	-0.2	-3.04	0	0.01
HSPB8	HSPB8	0.19	2.93	0	0.01
HTR2C	HTR2C	0.19	2.85	0	0.01
HTRA1	HTRA1	-0.2	-3.11	0	0.01
IDH1	IDH1	-0.22	-3.15	0	0.01
IFNGR2	IFNGR2	-0.2	-2.94	0	0.01
IFRD2	IFRD2	-0.19	-2.9	0	0.01
IL11	IL11	0.19	2.97	0	0.01
IL12A	IL12A	0.21	3	0	0.01
IL13RA1	IL13RA1	-0.19	-2.87	0	0.01
IL20	IL20	0.18	2.85	0	0.01
IL4R	IL4R	0.2	2.97	0	0.01
IL5RA	IL5RA	0.2	2.95	0	0.01
ILF2	ILF2	-0.2	-3.11	0	0.01
IMPDH1	IMPDH1	-0.19	-2.96	0	0.01
ITK	ITK	-0.19	-2.88	0	0.01
JAK2	JAK2	-0.19	-3.04	0	0.01
KCNK9	KCNK9	-0.21	-3.08	0	0.01
KCNN2	KCNN2	0.19	2.88	0	0.01
KCNN3	KCNN3	0.19	2.84	0	0.01
KDM4B	KDM4B	-0.2	-3.13	0	0.01
KDR	KDR	0.19	2.85	0	0.01
KIAA1279	KIAA1279	-0.18	-2.86	0	0.01
KITLG	KITLG	-0.19	-3	0	0.01
KLF10	KLF10	-0.21	-3	0	0.01
KLF4	KLF4	-0.18	-2.91	0.01	0.01
KLHDC2	KLHDC2	0.2	2.96	0	0.01
KRT19	KRT19	0.2	3.02	0	0.01
KRT7	KRT7	0.2	3	0	0.01
LEPREL1	LEPREL1	-0.19	-2.97	0	0.01
LRP10	LRP10	-0.19	-2.88	0	0.01
MAP2K1	MAP2K1	-0.2	-3.16	0	0.01
MAP2K2	MAP2K2	-0.19	-2.92	0	0.01
MAP2K3	MAP2K3	0.19	2.93	0	0.01
MAP3K4	MAP3K4	0.19	2.95	0	0.01
MAP4K4	MAP4K4	0.19	3.04	0	0.01
MBNL2	MBNL2	-0.19	-2.92	0	0.01
ME1	ME1	-0.2	-3.05	0	0.01
MED15	MED15	-0.2	-3.15	0	0.01
MKI67IP	MKI67IP	0.18	2.8	0	0.01
MSMO1	MSMO1	0.18	2.9	0.01	0.01
NAGA	NAGA	-0.19	-2.92	0	0.01
NASP	NASP	-0.21	-3.06	0	0.01
NCOA4	NCOA4	0.2	3	0	0.01
NDFIP1	NDFIP1	-0.21	-3.18	0	0.01
NDUFB3	NDUFB3	0.19	2.9	0	0.01
NOD1	NOD1	-0.19	-3.01	0	0.01
NPTN	NPTN	0.2	3.04	0	0.01
NR1I3	NR1I3	-0.18	-2.86	0	0.01
NR3C1	NR3C1	0.2	3.03	0	0.01
NTRK2	NTRK2	0.19	2.99	0	0.01
NUCB2	NUCB2	0.19	2.99	0	0.01
NUP88	NUP88	-0.2	-2.89	0	0.01
NVL	NVL	0.2	2.95	0	0.01
OLIG3	OLIG3	-0.2	-3.01	0	0.01
OPRD1	OPRD1	0.2	2.88	0.01	0.01
OR52B2	OR52B2	-0.18	-2.87	0	0.01
OSR1	OSR1	-0.19	-3.16	0	0.01
OXCT1	OXCT1	0.19	2.96	0	0.01
P2RX1	P2RX1	0.19	2.86	0	0.01
PAF1	PAF1	0.2	3.04	0	0.01
PAK2	PAK2	0.17	2.84	0	0.01
PASD1	PASD1	0.19	3.05	0	0.01
PCBD1	PCBD1	0.19	2.85	0	0.01
PDE4C	PDE4C	0.19	2.87	0	0.01
PDX1	PDX1	-0.19	-2.96	0	0.01
PECR	PECR	-0.18	-3.03	0	0.01
PHF13	PHF13	-0.19	-2.89	0.01	0.01
PHF23	PHF23	0.2	3.03	0	0.01
PIK3CB	PIK3CB	-0.19	-2.86	0	0.01
PISD	PISD	-0.19	-2.97	0	0.01
PKIA	PKIA	0.18	2.83	0	0.01
PLA2G1B	PLA2G1B	0.2	2.96	0	0.01
PLA2G2A	PLA2G2A	0.19	2.88	0	0.01
PLD1	PLD1	0.18	2.86	0	0.01
PLP2	PLP2	0.18	2.93	0.01	0.01
PML	PML	0.17	2.82	0.01	0.01
PNKP	PNKP	0.19	2.96	0	0.01
POLR3B	POLR3B	-0.21	-3.16	0	0.01
POLR3C	POLR3C	-0.2	-3.07	0	0.01
PPIF	PPIF	0.19	2.8	0	0.01
PRDM1	PRDM1	0.2	3	0	0.01
PRR15L	PRR15L	0.2	2.97	0	0.01
PRSS3	PRSS3	-0.19	-2.95	0	0.01
PSMB10	PSMB10	-0.2	-3.17	0	0.01
PSMB5	PSMB5	-0.2	-2.96	0	0.01
PSMB9	PSMB9	0.19	3.03	0	0.01
PSMD4	PSMD4	0.18	3	0	0.01
PSMD9	PSMD9	-0.18	-2.88	0	0.01
PSPH	PSPH	0.19	2.87	0	0.01
PTMS	PTMS	0.18	2.81	0.01	0.01
PTPN12	PTPN12	0.2	2.92	0	0.01
PTPRF	PTPRF	-0.21	-3.15	0	0.01
PUS10	PUS10	0.18	2.88	0	0.01
PYCRL	PYCRL	-0.18	-2.86	0	0.01
QRSL1	QRSL1	-0.2	-3.06	0	0.01
RAF1	RAF1	0.19	3.03	0	0.01
RBKS	RBKS	0.2	2.96	0	0.01
RETSAT	RETSAT	0.18	2.93	0	0.01
RGS16	RGS16	0.18	2.8	0	0.01
RIOK2	RIOK2	-0.18	-3	0	0.01
RNF186	RNF186	0.19	2.95	0	0.01
RPS6KL1	RPS6KL1	-0.2	-3.11	0	0.01
RRM1	RRM1	-0.18	-2.89	0	0.01
RRM2	RRM2	-0.19	-2.9	0.01	0.01
RUFY1	RUFY1	0.2	2.98	0	0.01
RUNX1	RUNX1	-0.19	-2.89	0	0.01
RUVBL1	RUVBL1	-0.19	-2.87	0	0.01
S100P	S100P	-0.2	-2.93	0	0.01
SC5DL	SC5DL	-0.19	-3	0.01	0.01
SEC61A2	SEC61A2	0.2	3.04	0	0.01
SERPINA5	SERPINA5	-0.2	-3.07	0	0.01
SIRPG	SIRPG	-0.18	-2.88	0	0.01
SLC16A6	SLC16A6	-0.17	-2.86	0	0.01
SLC22A2	SLC22A2	-0.18	-2.96	0	0.01
SLC25A32	SLC25A32	-0.2	-3.13	0	0.01
SLC25A46	SLC25A46	0.19	3	0	0.01
SLC36A1	SLC36A1	0.2	2.94	0	0.01
SMARCA5	SMARCA5	-0.18	-2.92	0	0.01
SMARCB1	SMARCB1	0.19	2.9	0	0.01
SMURF1	SMURF1	0.2	3.05	0	0.01
SOX10	SOX10	0.19	2.85	0	0.01
SREBF1	SREBF1	-0.19	-2.87	0	0.01
SRGAP2	SRGAP2	-0.2	-2.98	0	0.01
STAT1	STAT1	-0.19	-2.86	0	0.01
STK33	STK33	0.19	2.9	0	0.01
SUZ12	SUZ12	-0.2	-3.06	0	0.01
ABHD2	ABHD2	0.18	2.76	0	0.02
ABL2	ABL2	0.19	2.79	0	0.02
ADAM15	ADAM15	-0.18	-2.79	0	0.02
ADAM17	ADAM17	-0.19	-2.75	0	0.02
AIRE	AIRE	-0.18	-2.83	0	0.02
AKR1C2	AKR1C2	0.18	2.71	0	0.02
ALAS1	ALAS1	0.17	2.76	0	0.02
AXIN1	AXIN1	-0.17	-2.8	0.01	0.02
BARX1	BARX1	0.18	2.77	0	0.02
BCL2	BCL2	0.17	2.78	0	0.02
BCL6	BCL6	-0.17	-2.74	0.01	0.02
BRAF	BRAF	0.17	2.68	0.01	0.02
BRPF1	BRPF1	0.18	2.71	0	0.02
CACNB2	CACNB2	-0.17	-2.8	0.01	0.02
CARD10	CARD10	0.17	2.67	0.01	0.02
CERK	CERK	-0.18	-2.73	0	0.02
CHEK1	CHEK1	-0.19	-2.82	0	0.02
CHRM1	CHRM1	0.17	2.73	0.01	0.02
CHRNA1	CHRNA1	0.16	2.69	0.02	0.02
CREM	CREM	0.17	2.68	0	0.02
CTDSP1	CTDSP1	0.17	2.67	0	0.02
CTPS	CTPS	0.18	2.72	0	0.02
CYP2D6	CYP2D6	0.17	2.72	0	0.02
DICER1	DICER1	0.17	2.71	0.01	0.02
DMD	DMD	0.18	2.77	0	0.02
DMRTB1	DMRTB1	-0.19	-2.85	0	0.02
DSG2	DSG2	0.17	2.68	0.01	0.02
DUSP3	DUSP3	-0.18	-2.75	0	0.02
EBNA1BP2	EBNA1BP2	-0.18	-2.8	0	0.02
EPHA2	EPHA2	-0.18	-2.79	0.01	0.02
EPHA7	EPHA7	-0.17	-2.76	0	0.02
ERBB2	ERBB2	0.17	2.75	0.01	0.02
ESR1	ESR1	0.16	2.69	0.01	0.02
ETNK1	ETNK1	0.18	2.71	0.01	0.02
ETS2	ETS2	0.17	2.74	0	0.02
ETV1	ETV1	-0.19	-2.73	0	0.02
EXOC2	EXOC2	-0.18	-2.75	0.01	0.02
FAP	FAP	0.18	2.72	0.01	0.02
FCHO1	FCHO1	0.19	2.77	0	0.02
FGF2	FGF2	0.17	2.69	0.01	0.02
FOSL1	FOSL1	0.18	2.79	0	0.02
FOXO1	FOXO1	-0.18	-2.8	0.01	0.02
FPGS	FPGS	-0.19	-2.83	0	0.02
GCLM	GCLM	-0.18	-2.78	0.01	0.02
GLRB	GLRB	-0.19	-2.82	0.01	0.02
GPR137	GPR137	0.19	2.72	0	0.02
GPR19	GPR19	0.18	2.71	0	0.02
GSK3A	GSK3A	-0.19	-2.82	0	0.02
GSK3B	GSK3B	0.18	2.77	0.01	0.02
HBE1	HBE1	0.18	2.73	0	0.02
HBP1	HBP1	-0.18	-2.77	0.01	0.02
HCN3	HCN3	-0.18	-2.82	0	0.02
HCRTR1	HCRTR1	0.19	2.77	0	0.02
HLA-DRB4	HLA-DRB4	0.17	2.7	0	0.02
HOXC4	HOXC4	0.18	2.76	0	0.02
HPSE	HPSE	0.16	2.69	0.01	0.02
HSF1	HSF1	0.18	2.74	0.01	0.02
HSF5	HSF5	0.18	2.71	0	0.02
HSPA5	HSPA5	0.17	2.68	0.01	0.02
HTR1A	HTR1A	0.18	2.77	0	0.02
IL12B	IL12B	0.18	2.72	0	0.02
IL2	IL2	0.17	2.76	0.01	0.02
IL23R	IL23R	0.18	2.78	0	0.02
IQGAP1	IQGAP1	-0.19	-2.82	0	0.02
IRF6	IRF6	-0.18	-2.82	0	0.02
KCNA10	KCNA10	0.18	2.79	0	0.02
LYN	LYN	-0.17	-2.73	0	0.02
LZIC	LZIC	0.17	2.72	0.01	0.02
MAOA	MAOA	-0.2	-2.79	0	0.02
MAP4K3	MAP4K3	-0.18	-2.74	0	0.02
MBTPS1	MBTPS1	0.18	2.69	0	0.02
MCM6	MCM6	0.19	2.76	0.01	0.02
MTHFD1	MTHFD1	0.17	2.76	0.01	0.02
MTR	MTR	-0.2	-2.84	0	0.02
NAB1	NAB1	0.18	2.73	0	0.02
NPSR1	NPSR1	0.19	2.76	0	0.02
NR0B1	NR0B1	-0.19	-2.82	0	0.02
NR5A1	NR5A1	-0.19	-2.79	0	0.02
NRBF2	NRBF2	-0.18	-2.78	0.01	0.02
NUP133	NUP133	-0.17	-2.73	0	0.02
OAZ2	OAZ2	-0.17	-2.76	0	0.02
OGG1	OGG1	-0.17	-2.78	0.01	0.02
OPN3	OPN3	0.19	2.75	0	0.02
OPRL1	OPRL1	-0.2	-2.85	0	0.02
OXER1	OXER1	0.18	2.77	0	0.02
OXGR1	OXGR1	-0.19	-2.79	0	0.02
PAK1	PAK1	0.17	2.72	0.01	0.02
PBK	PBK	0.18	2.7	0	0.02
PBXIP1	PBXIP1	-0.18	-2.72	0	0.02
PCGF6	PCGF6	-0.18	-2.84	0	0.02
PGM1	PGM1	-0.18	-2.81	0.01	0.02
PHLPP1	PHLPP1	0.18	2.69	0.01	0.02
PJA1	PJA1	0.18	2.76	0	0.02
PPP4C	PPP4C	0.17	2.73	0.01	0.02
PSMD8	PSMD8	-0.17	-2.76	0.01	0.02
PTGDR2	PTGDR2	-0.18	-2.82	0	0.02
PTS	PTS	0.18	2.79	0	0.02
RAN	RAN	0.18	2.75	0.01	0.02
RFK	RFK	0.18	2.76	0	0.02
RGS18	RGS18	0.19	2.73	0	0.02
RGS2	RGS2	0.19	2.77	0	0.02
RIPK4	RIPK4	-0.18	-2.74	0.01	0.02
RPA3	RPA3	-0.17	-2.75	0.01	0.02
RPL7	RPL7	-0.18	-2.78	0.01	0.02
S100B	S100B	0.17	2.75	0.01	0.02
SFN	SFN	0.18	2.69	0	0.02
SGPL1	SGPL1	0.18	2.79	0	0.02
SLC25A4	SLC25A4	0.18	2.76	0.01	0.02
SLC8A1	SLC8A1	0.17	2.71	0.01	0.02
SMARCC1	SMARCC1	0.2	2.78	0	0.02
SOX4	SOX4	0.19	2.77	0	0.02
SPDEF	SPDEF	0.19	2.78	0	0.02
STUB1	STUB1	-0.19	-2.77	0	0.02
ADAT1	ADAT1	-0.18	-2.7	0.01	0.03
ADRA2B	ADRA2B	0.17	2.61	0.01	0.03
ASPH	ASPH	0.17	2.63	0.01	0.03
ATIC	ATIC	0.18	2.63	0.01	0.03
AXL	AXL	-0.16	-2.67	0.01	0.03
BAZ2B	BAZ2B	-0.17	-2.7	0	0.03
BUB3	BUB3	0.18	2.66	0	0.03
BZW2	BZW2	-0.17	-2.66	0.01	0.03
CASK	CASK	0.17	2.62	0.01	0.03
CASP7	CASP7	0.17	2.65	0	0.03
CCR8	CCR8	0.17	2.66	0.01	0.03
CDK19	CDK19	0.17	2.58	0	0.03
CENPE	CENPE	0.17	2.65	0	0.03
CNOT8	CNOT8	0.18	2.64	0.01	0.03
COMT	COMT	0.16	2.61	0.02	0.03
CRTAP	CRTAP	-0.17	-2.68	0.01	0.03
CXCR7	CXCR7	0.18	2.65	0.01	0.03
DDIT3	DDIT3	0.17	2.63	0	0.03
DHRS7	DHRS7	0.18	2.57	0	0.03
DNTTIP2	DNTTIP2	-0.19	-2.7	0	0.03
DR1	DR1	-0.18	-2.67	0.01	0.03
EIF2B3	EIF2B3	0.16	2.6	0.01	0.03
FBXO5	FBXO5	0.17	2.63	0	0.03
FEN1	FEN1	0.17	2.62	0.01	0.03
FUT1	FUT1	-0.17	-2.65	0.01	0.03
FZD7	FZD7	0.18	2.64	0	0.03
GCDH	GCDH	0.17	2.65	0.01	0.03
GFOD1	GFOD1	0.18	2.6	0	0.03
GHR	GHR	0.18	2.6	0.01	0.03
GIT1	GIT1	-0.18	-2.65	0	0.03
GLI1	GLI1	0.18	2.66	0	0.03
GPR119	GPR119	0.17	2.64	0.01	0.03
GPSM1	GPSM1	0.17	2.64	0.01	0.03
HMGCS2	HMGCS2	-0.17	-2.65	0.01	0.03
HNMT	HNMT	0.17	2.58	0.01	0.03
HTR5A	HTR5A	-0.17	-2.67	0.01	0.03
JAZF1	JAZF1	0.17	2.63	0.01	0.03
KCNK2	KCNK2	0.17	2.66	0	0.03
KYNU	KYNU	0.17	2.6	0.02	0.03
LCMT1	LCMT1	0.17	2.66	0	0.03
LPHN2	LPHN2	-0.18	-2.65	0.01	0.03
MAN2B1	MAN2B1	-0.17	-2.7	0	0.03
MAPK11	MAPK11	0.16	2.6	0.02	0.03
MCM4	MCM4	0.16	2.63	0.01	0.03
MITF	MITF	-0.17	-2.66	0.01	0.03
MKX	MKX	0.17	2.66	0.01	0.03
MORF4L1	MORF4L1	0.17	2.61	0.01	0.03
MSH2	MSH2	0.17	2.63	0.01	0.03
MSH5	MSH5	0.17	2.62	0.01	0.03
MSH6	MSH6	0.15	2.64	0.02	0.03
MSX1	MSX1	-0.16	-2.71	0.02	0.03
NBR1	NBR1	0.17	2.62	0	0.03
NCOR2	NCOR2	0.17	2.65	0	0.03
NDUFB1	NDUFB1	-0.17	-2.69	0.01	0.03
NPBWR1	NPBWR1	0.17	2.63	0.01	0.03
NUMA1	NUMA1	-0.17	-2.67	0	0.03
PCK2	PCK2	-0.17	-2.66	0.01	0.03
PCMT1	PCMT1	0.17	2.58	0.02	0.03
PDE5A	PDE5A	0.17	2.58	0.01	0.03
PIAS4	PIAS4	-0.18	-2.7	0	0.03
PKD2	PKD2	0.18	2.62	0.01	0.03
PLCB3	PLCB3	0.17	2.63	0	0.03
PMAIP1	PMAIP1	0.18	2.66	0	0.03
POU2AF1	POU2AF1	0.17	2.66	0.01	0.03
PRKCG	PRKCG	-0.18	-2.65	0	0.03
PRKRA	PRKRA	0.17	2.6	0.01	0.03
PRLR	PRLR	-0.18	-2.7	0.01	0.03
PRPF6	PRPF6	0.17	2.61	0	0.03
PRSS23	PRSS23	-0.17	-2.72	0	0.03
RBBP8	RBBP8	0.18	2.65	0	0.03
RFWD2	RFWD2	-0.17	-2.69	0.01	0.03
RPF1	RPF1	0.18	2.63	0	0.03
RPS6KB1	RPS6KB1	-0.17	-2.66	0.01	0.03
SCRN1	SCRN1	0.17	2.59	0.01	0.03
SERPINH1	SERPINH1	-0.17	-2.68	0	0.03
SLC22A4	SLC22A4	0.17	2.6	0.01	0.03
SLC25A6	SLC25A6	0.16	2.58	0.02	0.03
SMURF2	SMURF2	0.17	2.59	0.01	0.03
SNAI3	SNAI3	-0.17	-2.71	0	0.03
SPAG7	SPAG7	0.17	2.59	0.01	0.03
SSB	SSB	0.17	2.59	0.01	0.03
STAM2	STAM2	0.18	2.63	0	0.03
ABCC5	ABCC5	-0.18	-2.63	0.01	0.04
AFG3L2	AFG3L2	0.16	2.51	0.01	0.04
AHCY	AHCY	0.17	2.54	0.02	0.04
AKAP17A	AKAP17A	-0.19	-2.62	0	0.04
ALDH3B2	ALDH3B2	0.16	2.55	0.01	0.04
ATP6V0C	ATP6V0C	0.17	2.56	0	0.04
C2	C2	-0.17	-2.59	0.01	0.04
C5	C5	-0.17	-2.63	0	0.04
CCNC	CCNC	0.17	2.56	0.01	0.04
CEP57	CEP57	-0.17	-2.61	0.02	0.04
CFD	CFD	-0.15	-2.6	0.02	0.04
CHRNA4	CHRNA4	0.17	2.52	0.01	0.04
CP	CP	0.17	2.56	0.01	0.04
CSNK1A1	CSNK1A1	0.17	2.55	0.01	0.04
CYP17A1	CYP17A1	-0.17	-2.59	0.01	0.04
EAPP	EAPP	-0.16	-2.62	0.02	0.04
EGR3	EGR3	0.17	2.53	0	0.04
FCGR2A	FCGR2A	0.17	2.54	0.01	0.04
GABRP	GABRP	0.17	2.52	0.01	0.04
GLRX2	GLRX2	-0.16	-2.59	0.01	0.04
GPER	GPER	-0.17	-2.62	0.01	0.04
GPR26	GPR26	-0.17	-2.6	0.01	0.04
GUCY1B3	GUCY1B3	-0.17	-2.58	0.01	0.04
HGS	HGS	0.16	2.56	0.01	0.04
HMGB1	HMGB1	0.17	2.51	0	0.04
HMMR	HMMR	0.16	2.55	0.01	0.04
IKZF5	IKZF5	0.16	2.54	0.02	0.04
IL1R2	IL1R2	-0.17	-2.62	0.01	0.04
ITCH	ITCH	-0.17	-2.6	0.02	0.04
ITGAV	ITGAV	0.16	2.52	0.02	0.04
KIF5C	KIF5C	0.18	2.55	0.01	0.04
LHX2	LHX2	-0.16	-2.61	0.02	0.04
LSM5	LSM5	0.16	2.57	0.01	0.04
MAP3K8	MAP3K8	-0.17	-2.6	0.01	0.04
MCHR2	MCHR2	-0.18	-2.57	0.01	0.04
MED1	MED1	-0.18	-2.6	0	0.04
MRGPRX4	MRGPRX4	-0.17	-2.59	0.01	0.04
MSRA	MSRA	0.17	2.54	0.01	0.04
MXD4	MXD4	-0.18	-2.6	0	0.04
NDUFA6	NDUFA6	0.16	2.55	0.01	0.04
NDUFAB1	NDUFAB1	-0.17	-2.6	0.01	0.04
NEK7	NEK7	0.16	2.54	0.01	0.04
OTX1	OTX1	-0.18	-2.57	0.01	0.04
PCCB	PCCB	0.16	2.51	0.01	0.04
PCSK9	PCSK9	-0.15	-2.58	0.01	0.04
PGR	PGR	0.17	2.51	0.01	0.04
PPP2CA	PPP2CA	0.17	2.52	0.02	0.04
PUM2	PUM2	0.17	2.56	0.01	0.04
PWP1	PWP1	-0.17	-2.58	0	0.04
RASA1	RASA1	0.16	2.53	0.01	0.04
RASGRP4	RASGRP4	-0.17	-2.57	0.01	0.04
RBBP6	RBBP6	0.17	2.55	0.01	0.04
RND3	RND3	0.16	2.51	0.01	0.04
RPL39L	RPL39L	0.18	2.55	0.01	0.04
SLC25A10	SLC25A10	-0.17	-2.58	0.01	0.04
SPR	SPR	-0.16	-2.57	0.01	0.04
SPTLC3	SPTLC3	0.17	2.51	0.01	0.04
ST13	ST13	-0.18	-2.63	0.01	0.04
STXBP2	STXBP2	-0.18	-2.61	0	0.04
ACHE	ACHE	0.17	2.5	0.01	0.05
AGTR2	AGTR2	0.15	2.49	0.02	0.05
ARL3	ARL3	0.16	2.48	0.01	0.05
AURKA	AURKA	-0.17	-2.53	0.01	0.05
BCAR1	BCAR1	0.16	2.46	0.03	0.05
BCR	BCR	-0.16	-2.55	0.02	0.05
BOLA1	BOLA1	0.16	2.45	0.02	0.05
C2CD2L	C2CD2L	0.16	2.46	0.02	0.05
CASP3	CASP3	0.16	2.48	0.01	0.05
CELSR2	CELSR2	0.17	2.48	0.02	0.05
DAG1	DAG1	-0.17	-2.56	0.01	0.05
DNMT3B	DNMT3B	0.16	2.47	0.01	0.05
DUSP9	DUSP9	0.16	2.46	0.02	0.05
EIF2S1	EIF2S1	-0.16	-2.51	0.01	0.05
EIF4EBP1	EIF4EBP1	-0.17	-2.53	0.01	0.05
EML3	EML3	-0.16	-2.53	0.02	0.05
FOS	FOS	0.16	2.5	0.02	0.05
GLIS3	GLIS3	-0.18	-2.53	0.01	0.05
GSR	GSR	0.16	2.46	0.02	0.05
HMGN5	HMGN5	-0.16	-2.52	0.01	0.05
IDH3B	IDH3B	0.16	2.47	0.02	0.05
ITGB5	ITGB5	-0.16	-2.52	0.02	0.05
ITPK1	ITPK1	-0.17	-2.54	0.01	0.05
KCNA2	KCNA2	-0.17	-2.56	0	0.05
KCNA7	KCNA7	-0.16	-2.56	0.01	0.05
LRRC32	LRRC32	-0.17	-2.56	0.01	0.05
MCM7	MCM7	0.16	2.49	0.02	0.05
MDH1	MDH1	-0.17	-2.53	0.01	0.05
MMP25	MMP25	0.17	2.49	0	0.05
MSL3	MSL3	0.16	2.48	0.01	0.05
MTSS1	MTSS1	-0.16	-2.52	0.01	0.05
NEK9	NEK9	0.16	2.48	0.02	0.05
NNT	NNT	-0.17	-2.55	0.01	0.05
NR1H3	NR1H3	0.16	2.46	0.02	0.05
NRIP3	NRIP3	0.17	2.49	0.01	0.05
PCDH15	PCDH15	0.16	2.49	0.03	0.05
PHF10	PHF10	-0.17	-2.53	0	0.05
PHRF1	PHRF1	0.15	2.5	0.01	0.05
PIH1D1	PIH1D1	0.16	2.5	0.01	0.05
PITPNA	PITPNA	-0.17	-2.54	0	0.05
PMPCB	PMPCB	0.16	2.47	0.01	0.05
PPARA	PPARA	-0.17	-2.54	0.01	0.05
RAD51C	RAD51C	0.16	2.47	0.02	0.05
RBBP7	RBBP7	-0.18	-2.53	0	0.05
RPS13	RPS13	0.17	2.47	0.01	0.05
SCNN1A	SCNN1A	0.15	2.5	0.02	0.05
SKP2	SKP2	0.17	2.46	0.01	0.05
SLC25A1	SLC25A1	0.16	2.5	0.01	0.05
SMARCA4	SMARCA4	-0.17	-2.52	0.01	0.05
ARHGAP1	ARHGAP1	0.16	2.4	0.01	0.06
BAX	BAX	0.16	2.44	0.02	0.06
BCKDK	BCKDK	0.16	2.41	0.01	0.06
CA2	CA2	0.16	2.42	0.02	0.06
CAPNS1	CAPNS1	0.15	2.4	0.02	0.06
CCT8	CCT8	-0.15	-2.47	0.02	0.06
CXCL12	CXCL12	0.16	2.45	0.03	0.06
DACH2	DACH2	0.16	2.41	0.02	0.06
DDC	DDC	0.16	2.43	0.03	0.06
ERCC1	ERCC1	0.16	2.43	0.03	0.06
F2	F2	0.16	2.44	0.02	0.06
FOXA2	FOXA2	-0.16	-2.51	0.02	0.06
FOXF2	FOXF2	-0.16	-2.47	0.01	0.06
GABRA2	GABRA2	-0.17	-2.5	0.01	0.06
GABRB2	GABRB2	0.15	2.45	0.02	0.06
GPR174	GPR174	0.15	2.43	0.03	0.06
GTF2H2	GTF2H2	0.16	2.44	0.01	0.06
HCK	HCK	0.16	2.4	0.01	0.06
HIF1A	HIF1A	-0.16	-2.48	0.01	0.06
HRH4	HRH4	-0.16	-2.5	0.03	0.06
HSD17B11	HSD17B11	0.15	2.44	0.03	0.06
IP6K2	IP6K2	0.16	2.43	0.02	0.06
JOSD1	JOSD1	0.16	2.43	0.01	0.06
KARS	KARS	0.16	2.45	0.02	0.06
KLF14	KLF14	0.17	2.43	0.01	0.06
LPAR6	LPAR6	-0.16	-2.48	0.01	0.06
LRRK1	LRRK1	0.16	2.41	0.01	0.06
MCM8	MCM8	0.16	2.43	0.01	0.06
MRPS16	MRPS16	0.16	2.44	0.01	0.06
MTTP	MTTP	-0.16	-2.48	0.01	0.06
NDUFS7	NDUFS7	-0.16	-2.49	0.01	0.06
NFE2L1	NFE2L1	0.15	2.42	0.03	0.06
NGFR	NGFR	0.16	2.41	0.02	0.06
OVCA2	OVCA2	0.17	2.44	0.02	0.06
PDE4A	PDE4A	0.15	2.41	0.02	0.06
PHF2	PHF2	-0.15	-2.48	0.03	0.06
PIM3	PIM3	0.15	2.42	0.04	0.06
PKIG	PKIG	0.15	2.45	0.02	0.06
PLAU	PLAU	0.16	2.4	0.01	0.06
PLS1	PLS1	0.15	2.42	0.05	0.06
POLB	POLB	0.16	2.4	0.02	0.06
PPIC	PPIC	0.15	2.42	0.03	0.06
PPIE	PPIE	0.17	2.44	0.01	0.06
PPP1CA	PPP1CA	0.15	2.41	0.01	0.06
PPP1CC	PPP1CC	0.15	2.42	0.02	0.06
PTP4A3	PTP4A3	0.16	2.4	0.01	0.06
PXMP2	PXMP2	0.15	2.45	0.03	0.06
RICTOR	RICTOR	0.14	2.42	0.04	0.06
SEC24C	SEC24C	0.16	2.4	0.02	0.06
SELP	SELP	0.15	2.42	0.03	0.06
SIRT5	SIRT5	0.16	2.44	0.02	0.06
SLC25A12	SLC25A12	-0.16	-2.48	0.01	0.06
SLC2A1	SLC2A1	-0.17	-2.47	0.01	0.06
ARHGEF5	ARHGEF5	0.16	2.37	0.02	0.07
BACE2	BACE2	0.15	2.37	0.03	0.07
BCHE	BCHE	0.16	2.37	0.03	0.07
CACNA1S	CACNA1S	-0.17	-2.44	0.02	0.07
CBLB	CBLB	-0.16	-2.46	0.01	0.07
CMPK1	CMPK1	-0.16	-2.45	0.01	0.07
CRADD	CRADD	-0.16	-2.44	0.01	0.07
E2F8	E2F8	-0.16	-2.46	0.02	0.07
EDNRB	EDNRB	-0.15	-2.45	0.02	0.07
F10	F10	0.15	2.36	0.03	0.07
FANCA	FANCA	-0.15	-2.46	0.02	0.07
FDX1L	FDX1L	0.16	2.36	0.02	0.07
GABRG3	GABRG3	0.15	2.38	0.04	0.07
GABRQ	GABRQ	0.15	2.39	0.03	0.07
GLTSCR1	GLTSCR1	-0.17	-2.46	0.01	0.07
GNG4	GNG4	0.15	2.36	0.02	0.07
GPR101	GPR101	0.15	2.39	0.02	0.07
HSPA8	HSPA8	0.16	2.39	0.01	0.07
IGSF8	IGSF8	-0.15	-2.43	0.04	0.07
ITSN1	ITSN1	0.16	2.39	0.02	0.07
LAMA3	LAMA3	0.15	2.38	0.03	0.07
LDLR	LDLR	0.15	2.36	0.04	0.07
LPL	LPL	-0.16	-2.45	0.02	0.07
LRRC40	LRRC40	0.16	2.37	0.01	0.07
MAP2	MAP2	-0.16	-2.42	0.02	0.07
MAPT	MAPT	-0.16	-2.43	0.01	0.07
MLH1	MLH1	-0.17	-2.45	0.01	0.07
MLL	MLL	0.16	2.37	0.02	0.07
MUT	MUT	0.15	2.36	0.02	0.07
MYB	MYB	0.15	2.37	0.03	0.07
NLK	NLK	-0.16	-2.42	0.01	0.07
NOS2	NOS2	0.15	2.39	0.02	0.07
OPRM1	OPRM1	0.16	2.38	0.01	0.07
OR10Z1	OR10Z1	-0.16	-2.45	0.01	0.07
PDE7A	PDE7A	0.15	2.39	0.02	0.07
PHGDH	PHGDH	-0.17	-2.46	0.01	0.07
PPP4R1	PPP4R1	-0.16	-2.44	0.02	0.07
PRKCQ	PRKCQ	0.16	2.37	0.02	0.07
PSMA8	PSMA8	-0.16	-2.43	0.02	0.07
RDX	RDX	-0.17	-2.43	0.01	0.07
RNGTT	RNGTT	-0.16	-2.44	0.01	0.07
RORB	RORB	-0.15	-2.42	0.03	0.07
RSPH1	RSPH1	-0.15	-2.45	0.04	0.07
SACM1L	SACM1L	-0.16	-2.46	0.01	0.07
SCN4A	SCN4A	0.15	2.36	0.04	0.07
SLC16A4	SLC16A4	-0.16	-2.46	0.01	0.07
SOCS2	SOCS2	-0.16	-2.42	0.03	0.07
SQSTM1	SQSTM1	0.16	2.39	0.04	0.07
ABCB4	ABCB4	-0.16	-2.38	0.02	0.08
ALDH9A1	ALDH9A1	-0.15	-2.39	0.04	0.08
ATG16L2	ATG16L2	-0.14	-2.37	0.06	0.08
CACNB1	CACNB1	-0.16	-2.39	0.02	0.08
CREBBP	CREBBP	-0.15	-2.38	0.02	0.08
CTSK	CTSK	-0.16	-2.37	0.02	0.08
DVL1	DVL1	-0.16	-2.41	0.01	0.08
EDEM1	EDEM1	-0.16	-2.4	0.02	0.08
ERBB4	ERBB4	-0.16	-2.38	0.01	0.08
FOXD4L3	FOXD4L3	0.15	2.32	0.04	0.08
GABRB1	GABRB1	0.15	2.34	0.04	0.08
GABRR1	GABRR1	-0.17	-2.41	0.01	0.08
GCGR	GCGR	0.16	2.35	0.02	0.08
GNPTAB	GNPTAB	0.16	2.34	0.03	0.08
GPR111	GPR111	-0.17	-2.41	0.01	0.08
HSF2	HSF2	0.15	2.34	0.03	0.08
IGF2BP3	IGF2BP3	-0.16	-2.4	0.03	0.08
IRF3	IRF3	0.15	2.35	0.03	0.08
ITPR3	ITPR3	0.16	2.33	0.02	0.08
JAG1	JAG1	-0.16	-2.39	0.02	0.08
LARS2	LARS2	0.15	2.34	0.05	0.08
MAP4	MAP4	-0.16	-2.38	0.02	0.08
ME2	ME2	-0.16	-2.39	0.01	0.08
MTX2	MTX2	0.15	2.32	0.02	0.08
NCAPD2	NCAPD2	0.16	2.34	0.02	0.08
NOV	NOV	-0.15	-2.39	0.03	0.08
P4HA1	P4HA1	0.15	2.33	0.03	0.08
PDE6A	PDE6A	0.14	2.33	0.04	0.08
PDHA1	PDHA1	0.15	2.33	0.03	0.08
PDK1	PDK1	0.16	2.35	0.01	0.08
PMM2	PMM2	-0.15	-2.41	0.04	0.08
PPP2R2C	PPP2R2C	-0.15	-2.39	0.03	0.08
PRKCB	PRKCB	-0.15	-2.39	0.02	0.08
PTDSS1	PTDSS1	0.15	2.34	0.04	0.08
PTPLAD1	PTPLAD1	-0.15	-2.41	0.02	0.08
RAB23	RAB23	-0.16	-2.41	0.03	0.08
RAD50	RAD50	0.15	2.35	0.02	0.08
RAD51	RAD51	-0.15	-2.41	0.03	0.08
SIN3A	SIN3A	-0.17	-2.4	0	0.08
SLC16A2	SLC16A2	-0.16	-2.39	0.02	0.08
SLC1A6	SLC1A6	0.16	2.33	0.03	0.08
SLC47A1	SLC47A1	-0.15	-2.41	0.04	0.08
SMARCAD1	SMARCAD1	-0.15	-2.39	0.04	0.08
ABCC3	ABCC3	0.14	2.3	0.04	0.09
ADRB1	ADRB1	-0.15	-2.37	0.03	0.09
BLMH	BLMH	0.15	2.3	0.05	0.09
BRD3	BRD3	0.15	2.29	0.03	0.09
C1QTNF6	C1QTNF6	0.15	2.3	0.02	0.09
CCDC90A	CCDC90A	0.14	2.29	0.05	0.09
CCR5	CCR5	-0.16	-2.37	0.02	0.09
CEBPZ	CEBPZ	0.14	2.31	0.06	0.09
CHMP4A	CHMP4A	0.15	2.31	0.04	0.09
CLCNKA	CLCNKA	-0.15	-2.34	0.03	0.09
COPB2	COPB2	0.15	2.28	0.03	0.09
COPS5	COPS5	-0.16	-2.36	0.01	0.09
CRAT	CRAT	0.15	2.29	0.04	0.09
CXCR4	CXCR4	-0.16	-2.36	0.02	0.09
DTX1	DTX1	0.15	2.3	0.06	0.09
HSD17B2	HSD17B2	-0.15	-2.36	0.04	0.09
IL13RA2	IL13RA2	0.15	2.29	0.03	0.09
IRS2	IRS2	0.15	2.31	0.04	0.09
LGALS1	LGALS1	0.14	2.29	0.03	0.09
MAT2A	MAT2A	-0.15	-2.36	0.03	0.09
MCM2	MCM2	0.14	2.29	0.04	0.09
PARP1	PARP1	0.15	2.32	0.04	0.09
PCNA	PCNA	0.15	2.29	0.04	0.09
PDE11A	PDE11A	-0.16	-2.34	0.02	0.09
PDE6B	PDE6B	0.14	2.29	0.04	0.09
PDGFRA	PDGFRA	0.15	2.28	0.03	0.09
POLR2D	POLR2D	0.16	2.31	0.03	0.09
PRLHR	PRLHR	-0.15	-2.34	0.02	0.09
PTGER1	PTGER1	0.15	2.29	0.03	0.09
PTPN4	PTPN4	-0.15	-2.37	0.02	0.09
RALA	RALA	0.15	2.29	0.02	0.09
RELA	RELA	0.15	2.3	0.03	0.09
RRS1	RRS1	0.15	2.3	0.03	0.09
SAR1B	SAR1B	-0.16	-2.35	0.03	0.09
SLC1A2	SLC1A2	0.15	2.28	0.04	0.09
SLC38A2	SLC38A2	0.14	2.32	0.06	0.09
SRP14	SRP14	0.15	2.28	0.03	0.09
SRSF3	SRSF3	0.16	2.32	0.02	0.09
SS18L1	SS18L1	0.15	2.3	0.03	0.09
ABCC8	ABCC8	0.15	2.25	0.04	0.1
AK1	AK1	0.15	2.27	0.04	0.1
AKR7A2	AKR7A2	-0.15	-2.32	0.03	0.1
BAD	BAD	0.14	2.27	0.04	0.1
CASP10	CASP10	-0.15	-2.32	0.03	0.1
CD59	CD59	0.15	2.25	0.03	0.1
CGRRF1	CGRRF1	0.15	2.27	0.03	0.1
CXCL1	CXCL1	-0.16	-2.33	0.02	0.1
EPHB6	EPHB6	-0.15	-2.32	0.04	0.1
EXOC3	EXOC3	0.14	2.27	0.05	0.1
FST	FST	0.15	2.26	0.02	0.1
GABRE	GABRE	0.15	2.25	0.04	0.1
GCK	GCK	0.15	2.26	0.03	0.1
GNB1	GNB1	-0.14	-2.33	0.03	0.1
HOPX	HOPX	0.15	2.28	0.05	0.1
IKBKE	IKBKE	-0.15	-2.32	0.04	0.1
IL1B	IL1B	0.15	2.27	0.05	0.1
KDM4C	KDM4C	0.14	2.28	0.05	0.1
LASP1	LASP1	-0.15	-2.31	0.02	0.1
LGR5	LGR5	0.15	2.27	0.04	0.1
LSR	LSR	-0.15	-2.31	0.03	0.1
NR0B2	NR0B2	0.14	2.27	0.05	0.1
NR4A1	NR4A1	-0.15	-2.34	0.02	0.1
NTSR1	NTSR1	0.15	2.26	0.04	0.1
PER2	PER2	0.16	2.25	0.03	0.1
PHKB	PHKB	0.15	2.26	0.05	0.1
PKM2	PKM2	0.14	2.26	0.04	0.1
RHOBTB1	RHOBTB1	0.16	2.27	0.03	0.1
S1PR4	S1PR4	0.15	2.25	0.05	0.1
SLC38A1	SLC38A1	-0.15	-2.34	0.04	0.1
SLC9A1	SLC9A1	0.15	2.25	0.04	0.1
SMOC2	SMOC2	-0.16	-2.34	0.03	0.1
STAMBP	STAMBP	-0.16	-2.32	0.02	0.1
ANXA5	ANXA5	0.15	2.24	0.03	0.11
APOM	APOM	-0.16	-2.28	0.03	0.11
EPHB4	EPHB4	-0.15	-2.28	0.02	0.11
FOXO4	FOXO4	-0.16	-2.31	0.03	0.11
GABRD	GABRD	0.15	2.22	0.04	0.11
GGPS1	GGPS1	-0.15	-2.3	0.02	0.11
GPR107	GPR107	-0.15	-2.29	0.03	0.11
GPR31	GPR31	0.14	2.22	0.03	0.11
GPRC5A	GPRC5A	-0.15	-2.31	0.02	0.11
GTF2E2	GTF2E2	0.16	2.22	0.02	0.11
HSD17B4	HSD17B4	0.15	2.22	0.03	0.11
IRF9	IRF9	-0.15	-2.29	0.02	0.11
KCNH2	KCNH2	0.15	2.23	0.02	0.11
KIF5B	KIF5B	-0.15	-2.28	0.03	0.11
KLF7	KLF7	-0.16	-2.29	0.01	0.11
MAS1L	MAS1L	-0.15	-2.3	0.04	0.11
MEIS2	MEIS2	-0.14	-2.3	0.05	0.11
NADSYN1	NADSYN1	0.15	2.24	0.04	0.11
PDE6C	PDE6C	0.14	2.23	0.06	0.11
PMF1	PMF1	-0.15	-2.3	0.05	0.11
RFX4	RFX4	0.15	2.23	0.03	0.11
RPA1	RPA1	-0.15	-2.28	0.02	0.11
SF3B1	SF3B1	0.14	2.23	0.06	0.11
SLC6A3	SLC6A3	-0.15	-2.3	0.02	0.11
ALK	ALK	-0.15	-2.26	0.02	0.12
AMDHD2	AMDHD2	0.15	2.21	0.03	0.12
ATP5O	ATP5O	-0.15	-2.26	0.04	0.12
BCL9	BCL9	0.14	2.21	0.04	0.12
CAPNS2	CAPNS2	0.14	2.2	0.07	0.12
CCND3	CCND3	-0.15	-2.26	0.03	0.12
CDK10	CDK10	0.14	2.21	0.06	0.12
CLCNKB	CLCNKB	-0.15	-2.26	0.02	0.12
CREBL2	CREBL2	0.15	2.2	0.04	0.12
DHCR24	DHCR24	-0.15	-2.27	0.04	0.12
DHFR	DHFR	0.15	2.21	0.03	0.12
FASN	FASN	-0.15	-2.26	0.04	0.12
GABRG1	GABRG1	0.14	2.21	0.06	0.12
GALNT1	GALNT1	0.15	2.22	0.05	0.12
GSS	GSS	0.15	2.2	0.05	0.12
HOXA6	HOXA6	-0.14	-2.25	0.05	0.12
HTR7	HTR7	0.14	2.21	0.06	0.12
INS	INS	0.16	2.2	0.03	0.12
LDHA	LDHA	-0.15	-2.27	0.04	0.12
MYC	MYC	-0.15	-2.26	0.04	0.12
RASSF1	RASSF1	-0.16	-2.27	0.02	0.12
RRM2B	RRM2B	-0.14	-2.27	0.06	0.12
SIX2	SIX2	-0.15	-2.26	0.04	0.12
SORT1	SORT1	0.14	2.22	0.06	0.12
AARS	AARS	0.14	2.19	0.06	0.13
ADORA2A	ADORA2A	0.14	2.19	0.06	0.13
ADRA1B	ADRA1B	0.14	2.18	0.07	0.13
APOA5	APOA5	0.15	2.19	0.03	0.13
ATMIN	ATMIN	0.14	2.19	0.07	0.13
CNOT3	CNOT3	-0.14	-2.23	0.06	0.13
CPE	CPE	-0.14	-2.23	0.06	0.13
DRD5	DRD5	0.14	2.18	0.08	0.13
ENDOG	ENDOG	-0.14	-2.23	0.04	0.13
FEZ1	FEZ1	0.14	2.19	0.06	0.13
FKBP8	FKBP8	-0.14	-2.25	0.05	0.13
GPR34	GPR34	-0.15	-2.22	0.05	0.13
HDAC1	HDAC1	-0.14	-2.23	0.04	0.13
HSPG2	HSPG2	-0.15	-2.23	0.05	0.13
KIAA1009	KIAA1009	-0.15	-2.23	0.04	0.13
MAPK13	MAPK13	-0.15	-2.23	0.05	0.13
MYCBP	MYCBP	0.13	2.17	0.09	0.13
NUDCD3	NUDCD3	-0.15	-2.23	0.04	0.13
PCK1	PCK1	-0.14	-2.24	0.05	0.13
PKD1	PKD1	0.15	2.18	0.04	0.13
PLEKHJ1	PLEKHJ1	0.15	2.18	0.04	0.13
RARRES1	RARRES1	-0.15	-2.24	0.04	0.13
SLC11A2	SLC11A2	-0.14	-2.24	0.04	0.13
SRD5A1	SRD5A1	-0.15	-2.24	0.04	0.13
BLCAP	BLCAP	-0.15	-2.21	0.04	0.14
C5ORF62	C5ORF62	0.13	2.16	0.08	0.14
CHRNA7	CHRNA7	-0.15	-2.2	0.04	0.14
CSF1R	CSF1R	-0.15	-2.21	0.03	0.14
CSNK1A1L	CSNK1A1L	0.14	2.17	0.04	0.14
DIABLO	DIABLO	0.14	2.17	0.07	0.14
GABRA6	GABRA6	0.13	2.15	0.09	0.14
GPR114	GPR114	0.14	2.15	0.07	0.14
HDAC3	HDAC3	-0.14	-2.21	0.06	0.14
HSD17B10	HSD17B10	-0.15	-2.2	0.06	0.14
ITGA3	ITGA3	-0.14	-2.21	0.07	0.14
LRRC59	LRRC59	-0.14	-2.21	0.05	0.14
MMP9	MMP9	-0.14	-2.21	0.04	0.14
NR1H2	NR1H2	0.13	2.16	0.06	0.14
P4HB	P4HB	0.15	2.16	0.05	0.14
PDE6G	PDE6G	-0.14	-2.2	0.04	0.14
SCAP	SCAP	0.14	2.15	0.07	0.14
SFPQ	SFPQ	-0.15	-2.22	0.03	0.14
SMAD1	SMAD1	0.13	2.15	0.06	0.14
SMARCA2	SMARCA2	-0.15	-2.2	0.03	0.14
SMU1	SMU1	0.15	2.16	0.05	0.14
CA14	CA14	0.13	2.13	0.06	0.15
CREB3L1	CREB3L1	-0.15	-2.19	0.04	0.15
EPCAM	EPCAM	-0.15	-2.2	0.04	0.15
ETV5	ETV5	-0.13	-2.18	0.07	0.15
FADS1	FADS1	0.15	2.14	0.05	0.15
FNTB	FNTB	-0.14	-2.19	0.04	0.15
KCNK3	KCNK3	-0.14	-2.19	0.05	0.15
KCNQ1	KCNQ1	-0.14	-2.19	0.06	0.15
L3MBTL4	L3MBTL4	0.14	2.14	0.06	0.15
NR1D2	NR1D2	-0.14	-2.18	0.07	0.15
PACSIN3	PACSIN3	0.15	2.13	0.06	0.15
PLA2G2C	PLA2G2C	-0.15	-2.19	0.04	0.15
PRKAR2B	PRKAR2B	-0.14	-2.2	0.05	0.15
RBL2	RBL2	0.15	2.14	0.05	0.15
RPIA	RPIA	0.13	2.13	0.09	0.15
SLC7A1	SLC7A1	-0.14	-2.18	0.07	0.15
SNAPC1	SNAPC1	-0.14	-2.19	0.05	0.15
ALDH3B1	ALDH3B1	0.14	2.12	0.07	0.16
BCAT1	BCAT1	0.14	2.1	0.08	0.16
BCL10	BCL10	0.14	2.12	0.05	0.16
CDCA4	CDCA4	-0.14	-2.17	0.05	0.16
DHX8	DHX8	-0.13	-2.15	0.06	0.16
DNAJB6	DNAJB6	0.14	2.12	0.05	0.16
EPHA4	EPHA4	-0.15	-2.16	0.03	0.16
FAAH	FAAH	0.13	2.11	0.09	0.16
FZD6	FZD6	-0.15	-2.17	0.05	0.16
GAST	GAST	0.13	2.11	0.08	0.16
GNG8	GNG8	-0.14	-2.16	0.05	0.16
HDAC11	HDAC11	-0.13	-2.15	0.08	0.16
HLA-DRB1	HLA-DRB1	0.15	2.12	0.06	0.16
HTR6	HTR6	0.14	2.11	0.08	0.16
MMP2	MMP2	0.14	2.12	0.07	0.16
MRPL19	MRPL19	-0.14	-2.16	0.05	0.16
NIT1	NIT1	0.13	2.11	0.1	0.16
OSGEP	OSGEP	0.15	2.11	0.07	0.16
PIK3R3	PIK3R3	-0.15	-2.16	0.06	0.16
PLA2G12B	PLA2G12B	-0.15	-2.16	0.06	0.16
PLAUR	PLAUR	-0.13	-2.15	0.08	0.16
PTCH1	PTCH1	0.13	2.12	0.08	0.16
RYR1	RYR1	0.14	2.12	0.05	0.16
SARS	SARS	0.14	2.12	0.07	0.16
SCUBE1	SCUBE1	0.13	2.11	0.1	0.16
ABCC9	ABCC9	0.14	2.1	0.08	0.17
CHRM2	CHRM2	-0.15	-2.13	0.05	0.17
COASY	COASY	-0.13	-2.13	0.07	0.17
CPT1A	CPT1A	-0.13	-2.15	0.07	0.17
FADD	FADD	0.14	2.09	0.08	0.17
HCAR1	HCAR1	0.13	2.09	0.09	0.17
HERC6	HERC6	-0.14	-2.15	0.07	0.17
HOMER2	HOMER2	0.14	2.09	0.07	0.17
HSBP1	HSBP1	-0.13	-2.13	0.08	0.17
IKZF1	IKZF1	0.13	2.09	0.1	0.17
IL13	IL13	-0.14	-2.13	0.06	0.17
LTB4R	LTB4R	-0.14	-2.14	0.09	0.17
MAPK7	MAPK7	-0.15	-2.13	0.04	0.17
NSD1	NSD1	0.14	2.1	0.05	0.17
PDE6H	PDE6H	-0.14	-2.14	0.07	0.17
PRSS2	PRSS2	-0.15	-2.13	0.06	0.17
RYR3	RYR3	0.14	2.09	0.05	0.17
SENP6	SENP6	0.14	2.09	0.07	0.17
SLC25A20	SLC25A20	0.14	2.1	0.07	0.17
SOAT2	SOAT2	0.14	2.09	0.08	0.17
AP2M1	AP2M1	-0.14	-2.12	0.05	0.18
ARHGEF11	ARHGEF11	0.14	2.07	0.06	0.18
CA5A	CA5A	-0.14	-2.12	0.06	0.18
CACNA1B	CACNA1B	-0.13	-2.12	0.07	0.18
CASP6	CASP6	-0.14	-2.11	0.06	0.18
CEACAM6	CEACAM6	-0.15	-2.11	0.05	0.18
CETN3	CETN3	0.13	2.07	0.1	0.18
CHAT	CHAT	-0.13	-2.11	0.08	0.18
CYP2C19	CYP2C19	-0.14	-2.11	0.06	0.18
ERCC2	ERCC2	-0.14	-2.13	0.05	0.18
FAM104A	FAM104A	0.14	2.06	0.08	0.18
GOT1	GOT1	-0.14	-2.11	0.05	0.18
IL2RA	IL2RA	0.13	2.08	0.08	0.18
KRT26	KRT26	-0.14	-2.11	0.06	0.18
LHX9	LHX9	-0.14	-2.11	0.05	0.18
LIF	LIF	-0.14	-2.12	0.07	0.18
MARK4	MARK4	-0.13	-2.11	0.1	0.18
MESP1	MESP1	0.13	2.08	0.07	0.18
MIF	MIF	-0.14	-2.11	0.04	0.18
NSDHL	NSDHL	-0.14	-2.12	0.05	0.18
PDS5B	PDS5B	-0.14	-2.12	0.05	0.18
PLCG2	PLCG2	0.13	2.06	0.11	0.18
RPL3	RPL3	0.13	2.06	0.1	0.18
SDHC	SDHC	0.13	2.08	0.08	0.18
SNRNP70	SNRNP70	0.13	2.08	0.09	0.18
SRF	SRF	-0.14	-2.12	0.07	0.18
ACTN1	ACTN1	0.13	2.04	0.1	0.19
AVPR1B	AVPR1B	0.13	2.04	0.09	0.19
BCL2L11	BCL2L11	0.13	2.06	0.09	0.19
CASC3	CASC3	0.14	2.05	0.08	0.19
CEBPD	CEBPD	0.13	2.05	0.09	0.19
CHRNA9	CHRNA9	-0.13	-2.09	0.08	0.19
DYNLT3	DYNLT3	-0.13	-2.09	0.1	0.19
ERCC4	ERCC4	-0.14	-2.1	0.08	0.19
GPR84	GPR84	0.14	2.06	0.07	0.19
HDGFRP3	HDGFRP3	0.13	2.06	0.11	0.19
ILF3	ILF3	-0.13	-2.09	0.04	0.19
IP6K1	IP6K1	0.13	2.06	0.1	0.19
MAPK1IP1L	MAPK1IP1L	-0.14	-2.1	0.05	0.19
NEK4	NEK4	0.14	2.06	0.07	0.19
OSR2	OSR2	-0.14	-2.09	0.08	0.19
PANK2	PANK2	0.13	2.05	0.06	0.19
PHB2	PHB2	0.13	2.06	0.08	0.19
PHF15	PHF15	-0.13	-2.1	0.07	0.19
PSRC1	PSRC1	0.13	2.05	0.1	0.19
QARS	QARS	0.13	2.06	0.09	0.19
SERPINA6	SERPINA6	0.13	2.05	0.09	0.19
SLC6A9	SLC6A9	-0.14	-2.09	0.06	0.19
CFTR	CFTR	-0.14	-2.08	0.07	0.2
CLEC16A	CLEC16A	0.14	2.03	0.09	0.2
CROT	CROT	-0.13	-2.07	0.1	0.2
ECHS1	ECHS1	-0.14	-2.07	0.06	0.2
IL7R	IL7R	0.14	2.04	0.1	0.2
ITGAE	ITGAE	-0.14	-2.08	0.08	0.2
ITPKA	ITPKA	0.14	2.04	0.07	0.2
MDM2	MDM2	-0.13	-2.08	0.09	0.2
MGAT4A	MGAT4A	0.13	2.03	0.1	0.2
NTRK1	NTRK1	-0.13	-2.08	0.09	0.2
PDGFRB	PDGFRB	-0.14	-2.08	0.07	0.2
RXFP4	RXFP4	-0.13	-2.08	0.09	0.2
SOCS1	SOCS1	-0.14	-2.07	0.07	0.2
AP2A1	AP2A1	0.13	2.01	0.1	0.21
AVPR1A	AVPR1A	0.12	2.01	0.14	0.21
CAPN1	CAPN1	0.13	2.02	0.12	0.21
CELSR3	CELSR3	0.13	2.02	0.07	0.21
CHRNA2	CHRNA2	0.13	2.02	0.08	0.21
DHDDS	DHDDS	0.13	2.02	0.09	0.21
ENPP1	ENPP1	0.13	2.02	0.12	0.21
FTCD	FTCD	-0.13	-2.06	0.1	0.21
GBA	GBA	0.14	2.02	0.06	0.21
GRIN3A	GRIN3A	0.12	2.01	0.13	0.21
KLRC1	KLRC1	0.14	2.02	0.08	0.21
LTB4R2	LTB4R2	-0.13	-2.06	0.09	0.21
NUP85	NUP85	-0.13	-2.05	0.08	0.21
PAFAH1B3	PAFAH1B3	0.13	2.02	0.09	0.21
PFN2	PFN2	-0.12	-2.05	0.14	0.21
PHF5A	PHF5A	0.14	2.02	0.09	0.21
POFUT1	POFUT1	0.14	2.01	0.08	0.21
PTPLA	PTPLA	-0.14	-2.06	0.06	0.21
RPS6KB2	RPS6KB2	-0.14	-2.07	0.05	0.21
SIRT1	SIRT1	-0.14	-2.06	0.06	0.21
SLC18A1	SLC18A1	0.13	2.01	0.1	0.21
SMAD6	SMAD6	-0.13	-2.06	0.08	0.21
ACTB	ACTB	-0.13	-2.04	0.1	0.22
CAMK1	CAMK1	-0.13	-2.04	0.1	0.22
CCNF	CCNF	0.13	2.01	0.12	0.22
CLCN7	CLCN7	0.13	2	0.12	0.22
DDOST	DDOST	0.13	2	0.1	0.22
DFFB	DFFB	0.13	1.99	0.1	0.22
DLC1	DLC1	-0.14	-2.03	0.06	0.22
ESD	ESD	0.13	1.99	0.1	0.22
FOXP3	FOXP3	0.12	1.99	0.08	0.22
HRSP12	HRSP12	-0.14	-2.04	0.07	0.22
HTR1B	HTR1B	0.14	1.99	0.06	0.22
IKBKG	IKBKG	0.13	2	0.11	0.22
KLHDC9	KLHDC9	0.13	2	0.12	0.22
MAP2K7	MAP2K7	-0.14	-2.05	0.07	0.22
PLCD1	PLCD1	0.13	2	0.11	0.22
RPS2	RPS2	-0.14	-2.03	0.07	0.22
SRRM1	SRRM1	0.13	2	0.11	0.22
ARID3A	ARID3A	0.14	1.98	0.08	0.23
C16ORF5	C16ORF5	-0.13	-2.03	0.08	0.23
CISH	CISH	-0.13	-2.03	0.12	0.23
DUSP14	DUSP14	-0.14	-2.02	0.07	0.23
FGFR2	FGFR2	-0.13	-2.01	0.11	0.23
FOXA3	FOXA3	0.13	1.99	0.09	0.23
HDAC2	HDAC2	-0.14	-2.02	0.07	0.23
HTR2B	HTR2B	0.13	1.98	0.1	0.23
PDE4B	PDE4B	-0.13	-2.02	0.12	0.23
POLR2I	POLR2I	-0.14	-2.01	0.07	0.23
PPOX	PPOX	0.13	1.98	0.11	0.23
PTGS2	PTGS2	0.13	1.99	0.08	0.23
SCARB1	SCARB1	-0.14	-2.02	0.08	0.23
ALDH18A1	ALDH18A1	-0.14	-2.01	0.08	0.24
CACNA1H	CACNA1H	-0.12	-2.01	0.09	0.24
CCDC85B	CCDC85B	-0.13	-2.01	0.11	0.24
CLCN6	CLCN6	0.13	1.96	0.12	0.24
CSNK1D	CSNK1D	0.13	1.97	0.12	0.24
MEF2A	MEF2A	0.13	1.97	0.09	0.24
PDE9A	PDE9A	0.12	1.96	0.13	0.24
PLXNA2	PLXNA2	0.13	1.96	0.12	0.24
POU5F1	POU5F1	-0.13	-2.01	0.1	0.24
PPP2R5B	PPP2R5B	-0.14	-2.01	0.08	0.24
BMI1	BMI1	0.13	1.94	0.1	0.25
CHRNA10	CHRNA10	-0.13	-1.99	0.08	0.25
DUSP11	DUSP11	0.13	1.96	0.09	0.25
GSTT1	GSTT1	-0.12	-1.99	0.14	0.25
IFIH1	IFIH1	0.13	1.95	0.11	0.25
OGFOD1	OGFOD1	-0.14	-1.99	0.09	0.25
PDE1B	PDE1B	-0.12	-1.98	0.13	0.25
PNLDC1	PNLDC1	-0.13	-2	0.11	0.25
PRKX	PRKX	-0.13	-1.99	0.12	0.25
RYR2	RYR2	-0.13	-1.99	0.12	0.25
ALG9	ALG9	0.12	1.94	0.14	0.26
CTBP1	CTBP1	0.14	1.93	0.09	0.26
CTCFL	CTCFL	0.13	1.93	0.12	0.26
FKBP5	FKBP5	0.13	1.93	0.11	0.26
GFPT2	GFPT2	0.14	1.93	0.08	0.26
HDAC9	HDAC9	-0.14	-1.98	0.08	0.26
HOXA10	HOXA10	-0.12	-1.98	0.12	0.26
MMP13	MMP13	-0.13	-1.97	0.12	0.26
PDE3A	PDE3A	-0.13	-1.97	0.11	0.26
PLCB2	PLCB2	0.13	1.94	0.09	0.26
RAE1	RAE1	0.12	1.94	0.15	0.26
RIOK3	RIOK3	0.12	1.94	0.13	0.26
RRAGC	RRAGC	0.13	1.94	0.1	0.26
ADRB2	ADRB2	-0.13	-1.96	0.08	0.27
AURKC	AURKC	-0.13	-1.96	0.1	0.27
AVPR2	AVPR2	0.12	1.92	0.11	0.27
DHX29	DHX29	0.12	1.92	0.14	0.27
LSM6	LSM6	0.13	1.92	0.11	0.27
MYLIP	MYLIP	0.12	1.92	0.17	0.27
PDLIM4	PDLIM4	0.12	1.92	0.13	0.27
PRKAB2	PRKAB2	-0.13	-1.96	0.09	0.27
B4GALNT1	B4GALNT1	-0.12	-1.94	0.14	0.28
CYB561	CYB561	0.12	1.91	0.13	0.28
GART	GART	-0.12	-1.95	0.17	0.28
KCNJ1	KCNJ1	-0.13	-1.95	0.14	0.28
KSR2	KSR2	-0.12	-1.94	0.13	0.28
PURA	PURA	-0.13	-1.95	0.11	0.28
RARA	RARA	-0.12	-1.94	0.12	0.28
SLC7A5	SLC7A5	-0.13	-1.94	0.14	0.28
SNAPC4	SNAPC4	-0.12	-1.95	0.13	0.28
ADRB3	ADRB3	0.13	1.89	0.13	0.29
BTRC	BTRC	0.13	1.89	0.11	0.29
MED4	MED4	0.13	1.89	0.11	0.29
SLC12A7	SLC12A7	-0.12	-1.93	0.13	0.29
APEX1	APEX1	0.13	1.88	0.14	0.3
BNIP2	BNIP2	-0.13	-1.92	0.14	0.3
ENOPH1	ENOPH1	0.12	1.87	0.18	0.3
PGF	PGF	0.12	1.89	0.16	0.3
PIGB	PIGB	-0.11	-1.92	0.17	0.3
RIPK1	RIPK1	0.12	1.88	0.14	0.3
AQP12A	AQP12A	0.12	1.86	0.16	0.31
ARAF	ARAF	0.13	1.86	0.13	0.31
BACH1	BACH1	0.12	1.87	0.16	0.31
EPS8	EPS8	0.12	1.87	0.17	0.31
GPR113	GPR113	0.13	1.87	0.11	0.31
GRIN2A	GRIN2A	-0.13	-1.91	0.13	0.31
IL27	IL27	0.12	1.86	0.14	0.31
INTS3	INTS3	0.12	1.87	0.13	0.31
SLCO1B3	SLCO1B3	0.12	1.86	0.16	0.31
ACBD3	ACBD3	0.13	1.85	0.12	0.32
EIF5	EIF5	-0.13	-1.9	0.11	0.32
GLOD4	GLOD4	-0.12	-1.9	0.13	0.32
GNA13	GNA13	-0.12	-1.89	0.13	0.32
HNF4G	HNF4G	0.13	1.86	0.14	0.32
KCNA3	KCNA3	-0.13	-1.9	0.12	0.32
LACC1	LACC1	0.13	1.85	0.18	0.32
LSP1	LSP1	-0.13	-1.89	0.11	0.32
STK24	STK24	0.12	1.86	0.16	0.32
DAXX	DAXX	0.12	1.84	0.13	0.33
KIF2C	KIF2C	0.11	1.85	0.2	0.33
KLF6	KLF6	0.12	1.84	0.2	0.33
MBD6	MBD6	-0.12	-1.89	0.16	0.33
NPDC1	NPDC1	-0.13	-1.89	0.12	0.33
GNB5	GNB5	0.12	1.83	0.19	0.34
INSR	INSR	0.12	1.83	0.19	0.34
NR2C1	NR2C1	0.11	1.82	0.2	0.34
PAK4	PAK4	0.12	1.83	0.17	0.34
PTGR2	PTGR2	-0.13	-1.88	0.12	0.34
E2F4	E2F4	0.12	1.82	0.17	0.35
EGLN1	EGLN1	0.12	1.81	0.19	0.35
KCNU1	KCNU1	0.12	1.81	0.15	0.35
NENF	NENF	0.12	1.82	0.14	0.35
PAX8	PAX8	0.11	1.81	0.17	0.35
DHX9	DHX9	-0.12	-1.85	0.13	0.36
ITGB1	ITGB1	-0.12	-1.85	0.15	0.36
MRGPRX2	MRGPRX2	0.12	1.8	0.17	0.36
POLR1C	POLR1C	0.12	1.8	0.2	0.36
SOD2	SOD2	-0.12	-1.85	0.16	0.36
CACNA2D2	CACNA2D2	0.12	1.8	0.18	0.37
CBX4	CBX4	0.11	1.79	0.22	0.37
DSE	DSE	-0.12	-1.84	0.17	0.37
KRT8	KRT8	0.12	1.79	0.16	0.37
PPP2R5A	PPP2R5A	-0.12	-1.84	0.15	0.37
SLC30A8	SLC30A8	-0.12	-1.84	0.17	0.37
EWSR1	EWSR1	0.12	1.78	0.16	0.38
OXTR	OXTR	-0.12	-1.83	0.17	0.38
POLR1A	POLR1A	-0.12	-1.83	0.16	0.38
QPCT	QPCT	0.11	1.78	0.23	0.38
CLOCK	CLOCK	-0.11	-1.81	0.19	0.39
DPYD	DPYD	-0.11	-1.81	0.17	0.39
FN1	FN1	0.11	1.77	0.19	0.39
HOXA2	HOXA2	0.11	1.77	0.24	0.39
MBOAT7	MBOAT7	-0.12	-1.82	0.17	0.39
IRAK2	IRAK2	-0.12	-1.8	0.19	0.4
KCNT1	KCNT1	0.12	1.75	0.19	0.4
MAMLD1	MAMLD1	-0.12	-1.81	0.17	0.4
MAPK3	MAPK3	-0.12	-1.8	0.19	0.4
PDE8A	PDE8A	-0.12	-1.81	0.17	0.4
RAB4A	RAB4A	0.12	1.76	0.2	0.4
RORC	RORC	0.11	1.76	0.16	0.4
CTBP2	CTBP2	-0.12	-1.79	0.19	0.41
DHH	DHH	-0.12	-1.79	0.17	0.41
NKIRAS2	NKIRAS2	-0.12	-1.79	0.17	0.41
PDE8B	PDE8B	-0.12	-1.79	0.18	0.41
SLC6A4	SLC6A4	0.11	1.75	0.22	0.41
ATG4A	ATG4A	-0.12	-1.78	0.17	0.42
BECN1	BECN1	0.11	1.73	0.21	0.42
DNAJC15	DNAJC15	0.11	1.74	0.23	0.42
FECH	FECH	0.11	1.73	0.24	0.42
POLA1	POLA1	-0.12	-1.78	0.17	0.42
PPP2R5E	PPP2R5E	0.11	1.73	0.22	0.42
PTK2B	PTK2B	-0.12	-1.78	0.19	0.42
SIK3	SIK3	-0.12	-1.78	0.18	0.42
DCLRE1B	DCLRE1B	0.12	1.72	0.2	0.43
NAE1	NAE1	0.11	1.72	0.25	0.43
SLC16A3	SLC16A3	0.11	1.72	0.25	0.43
ELOVL4	ELOVL4	0.12	1.72	0.21	0.44
LIPA	LIPA	-0.11	-1.76	0.21	0.44
SLC6A2	SLC6A2	0.11	1.71	0.23	0.44
AR	AR	0.11	1.7	0.23	0.45
ELOVL6	ELOVL6	-0.12	-1.75	0.21	0.45
HSPA1A	HSPA1A	0.11	1.7	0.23	0.45
KISS1R	KISS1R	0.11	1.7	0.21	0.45
MLLT11	MLLT11	0.12	1.7	0.21	0.45
NME1	NME1	0.11	1.7	0.23	0.45
RNF138	RNF138	0.11	1.71	0.24	0.45
CYP2C8	CYP2C8	-0.11	-1.74	0.19	0.46
IL10	IL10	-0.11	-1.74	0.22	0.46
KIT	KIT	-0.12	-1.74	0.21	0.46
DNMT3A	DNMT3A	0.11	1.68	0.25	0.47
HCFC1	HCFC1	-0.12	-1.73	0.21	0.47
MTA1	MTA1	0.11	1.69	0.22	0.47
SLCO1B1	SLCO1B1	-0.11	-1.73	0.23	0.47
FLI1	FLI1	-0.12	-1.72	0.2	0.48
GNAQ	GNAQ	0.11	1.67	0.25	0.48
PAN2	PAN2	0.1	1.67	0.26	0.48
AIMP2	AIMP2	0.1	1.66	0.25	0.49
ATP5L	ATP5L	-0.11	-1.7	0.22	0.5
MST1R	MST1R	-0.11	-1.7	0.24	0.5
MYCBP2	MYCBP2	0.1	1.65	0.27	0.5
NDUFA2	NDUFA2	-0.11	-1.7	0.26	0.5
GM2A	GM2A	-0.11	-1.69	0.24	0.51
BRP44	BRP44	-0.11	-1.67	0.22	0.53
CYP3A5	CYP3A5	-0.11	-1.67	0.27	0.53
DDX39B	DDX39B	0.1	1.62	0.28	0.53
IFNAR2	IFNAR2	-0.11	-1.67	0.25	0.53
CCR2	CCR2	-0.11	-1.66	0.27	0.54
GPR158	GPR158	-0.11	-1.65	0.26	0.55
HSPE1	HSPE1	-0.11	-1.65	0.24	0.55
KCNJ5	KCNJ5	-0.12	-1.65	0.2	0.56
PEX11A	PEX11A	0.1	1.59	0.3	0.56
POLR2F	POLR2F	-0.11	-1.64	0.24	0.56
PRKAG1	PRKAG1	0.1	1.59	0.29	0.56
BCL2L2	BCL2L2	0.11	1.58	0.28	0.57
FOXP4	FOXP4	0.1	1.58	0.3	0.57
GFRA1	GFRA1	0.1	1.59	0.32	0.57
HNF1A	HNF1A	0.1	1.58	0.29	0.57
PPM1L	PPM1L	0.11	1.58	0.3	0.57
RNPS1	RNPS1	-0.11	-1.63	0.23	0.57
SUCNR1	SUCNR1	0.1	1.58	0.3	0.57
BTG1	BTG1	-0.11	-1.63	0.27	0.58
DLX3	DLX3	0.1	1.57	0.3	0.58
GALE	GALE	-0.11	-1.62	0.28	0.58
HOXA5	HOXA5	0.1	1.57	0.29	0.58
MT-ND1	MT-ND1	-0.1	-1.63	0.28	0.58
SEC24B	SEC24B	0.1	1.57	0.31	0.58
ARNTL2	ARNTL2	-0.1	-1.6	0.3	0.6
FAM114A2	FAM114A2	-0.1	-1.6	0.27	0.6
GPR128	GPR128	0.1	1.54	0.28	0.61
METRN	METRN	0.1	1.54	0.31	0.61
CDKN2B	CDKN2B	-0.1	-1.59	0.3	0.62
SGK3	SGK3	-0.1	-1.59	0.28	0.62
SLC1A1	SLC1A1	-0.1	-1.59	0.28	0.62
CHAF1B	CHAF1B	0.09	1.52	0.37	0.63
EIF4E	EIF4E	0.1	1.52	0.32	0.63
KIF14	KIF14	0.1	1.52	0.33	0.63
S100A6	S100A6	-0.11	-1.58	0.28	0.63
AKR1B1	AKR1B1	-0.11	-1.55	0.27	0.66
RIPK2	RIPK2	-0.11	-1.54	0.3	0.66
NPRL2	NPRL2	-0.1	-1.54	0.35	0.67
EIF4B	EIF4B	0.1	1.47	0.35	0.68
SLC25A13	SLC25A13	-0.1	-1.52	0.35	0.69
PDIA5	PDIA5	0.09	1.44	0.36	0.7
ADH5	ADH5	-0.1	-1.51	0.31	0.71
FAH	FAH	-0.1	-1.5	0.34	0.71
NOTCH2	NOTCH2	-0.1	-1.5	0.36	0.71
GABRG2	GABRG2	-0.1	-1.49	0.33	0.72
GAPDH	GAPDH	-0.1	-1.49	0.35	0.72
GFOD2	GFOD2	0.09	1.42	0.4	0.72
LMNB2	LMNB2	0.09	1.42	0.39	0.72
SLC27A3	SLC27A3	0.1	1.42	0.39	0.72
SREBF2	SREBF2	-0.09	-1.48	0.37	0.73
SUV39H1	SUV39H1	-0.1	-1.48	0.34	0.73
EHMT2	EHMT2	-0.1	-1.47	0.35	0.74
RALBP1	RALBP1	-0.1	-1.47	0.38	0.74
FBXO11	FBXO11	-0.1	-1.45	0.35	0.75
LIPE	LIPE	0.09	1.39	0.4	0.75
CHERP	CHERP	-0.09	-1.45	0.4	0.76
GPR18	GPR18	-0.09	-1.45	0.39	0.76
SIAH1	SIAH1	0.09	1.37	0.41	0.76
GNRHR	GNRHR	-0.09	-1.44	0.36	0.77
RFX6	RFX6	-0.09	-1.44	0.4	0.77
FLT1	FLT1	-0.09	-1.41	0.38	0.79
MMEL1	MMEL1	-0.09	-1.41	0.37	0.79
MRE11A	MRE11A	-0.09	-1.41	0.38	0.79
P2RY6	P2RY6	-0.09	-1.41	0.39	0.79
MED6	MED6	-0.09	-1.4	0.41	0.8
PPARG	PPARG	-0.09	-1.4	0.4	0.8
SLC29A2	SLC29A2	0.09	1.32	0.44	0.81
E2F1	E2F1	0.08	1.3	0.43	0.82
PDE4D	PDE4D	0.08	1.31	0.44	0.82
SMC4	SMC4	0.09	1.3	0.43	0.82
SPTAN1	SPTAN1	0.08	1.3	0.44	0.82
EDNRA	EDNRA	0.09	1.28	0.46	0.83
EZH1	EZH1	0.08	1.29	0.46	0.83
AKR1C3	AKR1C3	-0.08	-1.36	0.41	0.84
CRABP2	CRABP2	-0.09	-1.35	0.41	0.84
FFAR4	FFAR4	0.09	1.27	0.46	0.84
GTF2H3	GTF2H3	0.08	1.26	0.46	0.84
KIAA0922	KIAA0922	0.08	1.26	0.47	0.84
AIM2	AIM2	0.03	0.55	0.54	0.85
ANG	ANG	0.04	0.55	0.59	0.85
CHD8	CHD8	0.09	1.25	0.48	0.85
CIRBP	CIRBP	0.04	0.59	0.58	0.85
CRKL	CRKL	0.04	0.57	0.59	0.85
EPRS	EPRS	0.04	0.56	0.59	0.85
FABP6	FABP6	0.08	1.24	0.44	0.85
FKBP3	FKBP3	0.04	0.59	0.55	0.85
GPR148	GPR148	0.04	0.55	0.56	0.85
HMOX1	HMOX1	0.04	0.56	0.56	0.85
IGF2R	IGF2R	0.04	0.58	0.56	0.85
ING2	ING2	0.04	0.57	0.55	0.85
INSIG1	INSIG1	0.04	0.58	0.57	0.85
IRF1	IRF1	0.04	0.58	0.54	0.85
JUNB	JUNB	0.04	0.59	0.55	0.85
KAT7	KAT7	0.04	0.57	0.55	0.85
KLHL21	KLHL21	0.04	0.56	0.56	0.85
MMP12	MMP12	0.04	0.57	0.55	0.85
NEDD4	NEDD4	0.03	0.56	0.55	0.85
NOD2	NOD2	0.04	0.6	0.53	0.85
NTAN1	NTAN1	0.04	0.57	0.58	0.85
ORM1	ORM1	0.04	0.58	0.54	0.85
PIK3CD	PIK3CD	0.04	0.59	0.55	0.85
PIK3CG	PIK3CG	0.04	0.59	0.55	0.85
PPIH	PPIH	0.04	0.56	0.57	0.85
PQBP1	PQBP1	0.04	0.55	0.56	0.85
PRKAR1A	PRKAR1A	0.04	0.55	0.58	0.85
PSMD5	PSMD5	0.03	0.43	0.63	0.85
RAB11A	RAB11A	0.04	0.58	0.58	0.85
RPS16	RPS16	-0.09	-1.34	0.41	0.85
SLC2A2	SLC2A2	0.04	0.58	0.56	0.85
SMAD4	SMAD4	0.04	0.58	0.54	0.85
SUPV3L1	SUPV3L1	0.04	0.57	0.55	0.85
ABCA5	ABCA5	0.03	0.4	0.65	0.86
ABCB1	ABCB1	0.04	0.66	0.55	0.86
ABCB6	ABCB6	0.08	1.23	0.46	0.86
ABCC2	ABCC2	0.04	0.65	0.57	0.86
ABL1	ABL1	0.03	0.4	0.61	0.86
ACAD8	ACAD8	0.03	0.48	0.59	0.86
ACTA1	ACTA1	0.03	0.45	0.63	0.86
ADA	ADA	0.03	0.5	0.57	0.86
AK4	AK4	0.03	0.47	0.58	0.86
AKAP1	AKAP1	0.04	0.54	0.57	0.86
AKAP8	AKAP8	0.03	0.41	0.64	0.86
ALDH6A1	ALDH6A1	0.03	0.53	0.56	0.86
ALDOA	ALDOA	0.03	0.45	0.62	0.86
ANXA3	ANXA3	0.02	0.39	0.61	0.86
AOC3	AOC3	0.03	0.44	0.59	0.86
APC	APC	0.04	0.67	0.53	0.86
APOB	APOB	0.03	0.4	0.63	0.86
APOH	APOH	0.03	0.49	0.59	0.86
ARFGAP1	ARFGAP1	0.03	0.52	0.57	0.86
BCCIP	BCCIP	0.02	0.37	0.62	0.86
BCL2A1	BCL2A1	0.03	0.46	0.59	0.86
BCL2L1	BCL2L1	0.03	0.45	0.62	0.86
BHMT	BHMT	0.03	0.4	0.64	0.86
BHMT2	BHMT2	0.03	0.46	0.59	0.86
BIK	BIK	0.03	0.51	0.57	0.86
BLM	BLM	0.03	0.46	0.61	0.86
BNIP1	BNIP1	0.03	0.43	0.63	0.86
BNIP3L	BNIP3L	0.03	0.38	0.65	0.86
C16ORF80	C16ORF80	0.04	0.61	0.52	0.86
C2ORF3	C2ORF3	0.04	0.63	0.57	0.86
CA9	CA9	0.04	0.67	0.55	0.86
CACNA1D	CACNA1D	0.03	0.53	0.57	0.86
CARD9	CARD9	0.03	0.43	0.62	0.86
CBX6	CBX6	0.05	0.68	0.56	0.86
CCNB2	CCNB2	0.03	0.4	0.63	0.86
CCNG1	CCNG1	0.03	0.45	0.6	0.86
CCT7	CCT7	0.08	1.22	0.45	0.86
CD55	CD55	0.04	0.66	0.53	0.86
CDC25C	CDC25C	0.03	0.51	0.57	0.86
CFB	CFB	0.05	0.68	0.57	0.86
CHIA	CHIA	0.03	0.43	0.6	0.86
CLTB	CLTB	0.03	0.48	0.58	0.86
CNR1	CNR1	0.03	0.43	0.63	0.86
COL4A5	COL4A5	0.03	0.41	0.61	0.86
CPNE3	CPNE3	0.03	0.42	0.6	0.86
CPT1B	CPT1B	0.03	0.44	0.59	0.86
CREB3L4	CREB3L4	0.02	0.38	0.64	0.86
CRYAA	CRYAA	0.03	0.47	0.59	0.86
CSK	CSK	0.04	0.67	0.51	0.86
CTNNBIP1	CTNNBIP1	0.04	0.62	0.57	0.86
CTSL2	CTSL2	0.03	0.51	0.58	0.86
CUL2	CUL2	0.03	0.42	0.62	0.86
CYP1A2	CYP1A2	0.03	0.42	0.63	0.86
DAP	DAP	0.04	0.58	0.59	0.86
DBI	DBI	0.03	0.41	0.6	0.86
DDB1	DDB1	0.03	0.46	0.63	0.86
DERA	DERA	0.03	0.52	0.58	0.86
DNMT1	DNMT1	0.03	0.4	0.61	0.86
DPEP1	DPEP1	0.03	0.46	0.6	0.86
DRD2	DRD2	0.03	0.54	0.56	0.86
EHMT1	EHMT1	0.04	0.64	0.58	0.86
EIF2B2	EIF2B2	0.03	0.46	0.6	0.86
EIF6	EIF6	0.04	0.67	0.5	0.86
EPOR	EPOR	0.03	0.5	0.6	0.86
ERAP2	ERAP2	0.03	0.51	0.54	0.86
ESRRG	ESRRG	0.03	0.43	0.61	0.86
ETS1	ETS1	0.02	0.37	0.65	0.86
F11	F11	0.04	0.66	0.56	0.86
FABP4	FABP4	0.04	0.63	0.56	0.86
FBRS	FBRS	0.03	0.44	0.6	0.86
FBXL12	FBXL12	0.03	0.49	0.55	0.86
FER	FER	0.08	1.22	0.47	0.86
FES	FES	0.03	0.45	0.6	0.86
FGFR4	FGFR4	0.03	0.45	0.59	0.86
FIGF	FIGF	0.03	0.41	0.64	0.86
FZD2	FZD2	0.03	0.45	0.6	0.86
G6PD	G6PD	0.02	0.4	0.61	0.86
GFPT1	GFPT1	0.03	0.42	0.61	0.86
GMNN	GMNN	0.04	0.62	0.53	0.86
GPR65	GPR65	0.03	0.45	0.58	0.86
GPR78	GPR78	0.04	0.67	0.53	0.86
GPX3	GPX3	0.03	0.45	0.6	0.86
GPX4	GPX4	0.04	0.61	0.55	0.86
GRIK2	GRIK2	0.04	0.53	0.58	0.86
GRIN2D	GRIN2D	0.04	0.68	0.54	0.86
GSTZ1	GSTZ1	0.02	0.38	0.63	0.86
GTF2I	GTF2I	0.03	0.4	0.62	0.86
GTPBP8	GTPBP8	0.03	0.38	0.65	0.86
HIST2H2BE	HIST2H2BE	0.03	0.44	0.61	0.86
HMGB4	HMGB4	0.04	0.64	0.54	0.86
HSP90AA2	HSP90AA2	0.03	0.42	0.63	0.86
HSP90AB1	HSP90AB1	0.04	0.54	0.56	0.86
HSPA4	HSPA4	0.03	0.4	0.62	0.86
HSPD1	HSPD1	0.03	0.42	0.63	0.86
HYAL1	HYAL1	0.04	0.64	0.55	0.86
IDO1	IDO1	0.03	0.47	0.59	0.86
IGF2	IGF2	0.03	0.41	0.61	0.86
IGFBP6	IGFBP6	0.02	0.4	0.66	0.86
IHH	IHH	0.03	0.41	0.64	0.86
IL2RB	IL2RB	0.03	0.38	0.65	0.86
INSRR	INSRR	0.04	0.65	0.56	0.86
IRGM	IRGM	0.03	0.47	0.57	0.86
ITGB1BP1	ITGB1BP1	0.03	0.39	0.65	0.86
ITPR2	ITPR2	0.04	0.54	0.57	0.86
KAT6B	KAT6B	0.04	0.68	0.55	0.86
KBTBD2	KBTBD2	0.03	0.42	0.59	0.86
KCNMA1	KCNMA1	0.04	0.66	0.53	0.86
KCNN1	KCNN1	0.04	0.64	0.56	0.86
KCNQ5	KCNQ5	0.03	0.45	0.61	0.86
KDELR2	KDELR2	0.03	0.47	0.6	0.86
KDELR3	KDELR3	0.04	0.6	0.55	0.86
KDM3A	KDM3A	0.04	0.66	0.52	0.86
KDM5B	KDM5B	0.03	0.4	0.64	0.86
KIF20A	KIF20A	0.03	0.5	0.57	0.86
KPNB1	KPNB1	0.04	0.61	0.52	0.86
KRT12	KRT12	0.03	0.46	0.58	0.86
L1CAM	L1CAM	0.04	0.6	0.54	0.86
LCK	LCK	0.03	0.41	0.63	0.86
LDHB	LDHB	0.02	0.38	0.62	0.86
LIG1	LIG1	0.03	0.39	0.67	0.86
LIPF	LIPF	0.03	0.51	0.58	0.86
LIPT1	LIPT1	0.03	0.44	0.6	0.86
LPAR1	LPAR1	0.04	0.52	0.6	0.86
LRP4	LRP4	0.03	0.38	0.64	0.86
MAP2K4	MAP2K4	0.02	0.37	0.6	0.86
MAPK14	MAPK14	0.04	0.67	0.52	0.86
MAPK9	MAPK9	0.04	0.65	0.53	0.86
MARS	MARS	0.03	0.45	0.6	0.86
MAT1A	MAT1A	0.03	0.49	0.58	0.86
METTL1	METTL1	0.03	0.41	0.64	0.86
MICALL1	MICALL1	0.04	0.61	0.54	0.86
MPHOSPH9	MPHOSPH9	0.03	0.52	0.58	0.86
MRGPRF	MRGPRF	0.02	0.38	0.63	0.86
MTAP	MTAP	0.03	0.43	0.61	0.86
MTOR	MTOR	0.03	0.49	0.61	0.86
MYO10	MYO10	0.04	0.56	0.56	0.86
NCL	NCL	0.03	0.43	0.62	0.86
NCOA1	NCOA1	0.03	0.43	0.62	0.86
NCOA3	NCOA3	0.04	0.63	0.54	0.86
NDUFA1	NDUFA1	0.02	0.39	0.63	0.86
NDUFS3	NDUFS3	0.03	0.45	0.58	0.86
NDUFS6	NDUFS6	0.03	0.44	0.63	0.86
NEU1	NEU1	0.02	0.41	0.61	0.86
NF1	NF1	0.03	0.49	0.58	0.86
NFRKB	NFRKB	0.03	0.47	0.56	0.86
NIPBL	NIPBL	0.03	0.39	0.64	0.86
NR2F2	NR2F2	0.03	0.42	0.66	0.86
NRP1	NRP1	0.04	0.66	0.5	0.86
NUCKS1	NUCKS1	0.04	0.64	0.55	0.86
OXSR1	OXSR1	0.04	0.64	0.54	0.86
PANX2	PANX2	0.02	0.39	0.63	0.86
PAPOLA	PAPOLA	0.03	0.5	0.6	0.86
PAPSS1	PAPSS1	0.04	0.61	0.56	0.86
PARP15	PARP15	0.03	0.51	0.58	0.86
PARP2	PARP2	0.03	0.41	0.61	0.86
PDAP1	PDAP1	0.03	0.44	0.6	0.86
PGK1	PGK1	0.03	0.48	0.62	0.86
PHACTR1	PHACTR1	0.03	0.44	0.61	0.86
PHF17	PHF17	0.03	0.5	0.59	0.86
PIGA	PIGA	0.03	0.54	0.54	0.86
PIK3C3	PIK3C3	0.03	0.41	0.61	0.86
PKN1	PKN1	0.04	0.54	0.58	0.86
PLA2G15	PLA2G15	0.03	0.43	0.62	0.86
PLOD2	PLOD2	0.04	0.68	0.52	0.86
PNLIP	PNLIP	0.03	0.5	0.58	0.86
POLR3E	POLR3E	0.03	0.47	0.6	0.86
PON3	PON3	0.03	0.46	0.62	0.86
PPAP2B	PPAP2B	0.03	0.51	0.58	0.86
PRDM7	PRDM7	0.03	0.45	0.62	0.86
PRKAG3	PRKAG3	0.03	0.5	0.55	0.86
PRKCE	PRKCE	0.04	0.6	0.55	0.86
PRNP	PRNP	0.03	0.52	0.58	0.86
PRPF4B	PRPF4B	0.03	0.37	0.66	0.86
PSEN2	PSEN2	0.04	0.65	0.5	0.86
PSIP1	PSIP1	0.04	0.65	0.53	0.86
PSMA1	PSMA1	0.03	0.42	0.59	0.86
PSMD1	PSMD1	0.04	0.62	0.54	0.86
PSME1	PSME1	0.05	0.68	0.55	0.86
PTP4A1	PTP4A1	0.02	0.37	0.64	0.86
PUF60	PUF60	0.04	0.59	0.56	0.86
QRFPR	QRFPR	0.03	0.52	0.57	0.86
RAC3	RAC3	0.03	0.39	0.67	0.86
RAD23B	RAD23B	0.04	0.6	0.55	0.86
RAD54L	RAD54L	0.03	0.45	0.61	0.86
RASGRP1	RASGRP1	0.03	0.45	0.59	0.86
RCAN1	RCAN1	0.03	0.43	0.63	0.86
RFNG	RFNG	0.04	0.6	0.56	0.86
RHEB	RHEB	0.04	0.66	0.55	0.86
RHOD	RHOD	0.04	0.61	0.59	0.86
RNF14	RNF14	0.03	0.38	0.65	0.86
RPA2	RPA2	0.03	0.53	0.57	0.86
RPN2	RPN2	0.03	0.5	0.57	0.86
RPS10	RPS10	0.03	0.45	0.6	0.86
RPS15A	RPS15A	0.03	0.46	0.62	0.86
RPS6KA1	RPS6KA1	0.03	0.49	0.59	0.86
RPTOR	RPTOR	0.04	0.63	0.55	0.86
RRP12	RRP12	0.03	0.45	0.63	0.86
RRP1B	RRP1B	0.04	0.53	0.58	0.86
SAP18	SAP18	0.03	0.4	0.64	0.86
SERPIND1	SERPIND1	0.03	0.43	0.62	0.86
SESN1	SESN1	0.04	0.52	0.59	0.86
SETDB1	SETDB1	0.04	0.55	0.6	0.86
SHH	SHH	0.04	0.65	0.53	0.86
SLC12A3	SLC12A3	0.04	0.62	0.55	0.86
SLC25A15	SLC25A15	0.03	0.5	0.62	0.86
SLC25A28	SLC25A28	0.03	0.4	0.6	0.86
SLC35A1	SLC35A1	0.03	0.5	0.57	0.86
SLC35A3	SLC35A3	0.04	0.67	0.55	0.86
SLC6A14	SLC6A14	0.04	0.62	0.54	0.86
SLC7A11	SLC7A11	0.02	0.38	0.64	0.86
SLC7A9	SLC7A9	0.04	0.6	0.54	0.86
SMAD2	SMAD2	0.04	0.63	0.52	0.86
SMNDC1	SMNDC1	0.03	0.51	0.59	0.86
SNCA	SNCA	0.03	0.46	0.6	0.86
SORD	SORD	0.03	0.43	0.61	0.86
SOS1	SOS1	0.03	0.42	0.66	0.86
SPIRE2	SPIRE2	0.03	0.44	0.61	0.86
STAT6	STAT6	0.03	0.43	0.63	0.86
STK11	STK11	0.03	0.43	0.6	0.86
STK3	STK3	0.03	0.51	0.59	0.86
STX1A	STX1A	0.05	0.68	0.53	0.86
SULT2B1	SULT2B1	0.03	0.44	0.59	0.86
ACAA1	ACAA1	0.04	0.68	0.54	0.87
ADCY3	ADCY3	0.02	0.33	0.68	0.87
AES	AES	0.02	0.36	0.64	0.87
AK2	AK2	0.05	0.68	0.55	0.87
ALOX5	ALOX5	0.02	0.36	0.65	0.87
ANKRD49	ANKRD49	0.02	0.34	0.65	0.87
ASL	ASL	0.04	0.73	0.48	0.87
ATF5	ATF5	0.02	0.36	0.64	0.87
BAK1	BAK1	0.02	0.34	0.67	0.87
BBC3	BBC3	0.04	0.69	0.52	0.87
BCL2L13	BCL2L13	0.05	0.73	0.51	0.87
C1S	C1S	0.02	0.35	0.67	0.87
CD2BP2	CD2BP2	0.02	0.33	0.66	0.87
CDKN1B	CDKN1B	0.02	0.36	0.65	0.87
CHRNA3	CHRNA3	0.05	0.69	0.58	0.87
CORO1A	CORO1A	0.02	0.35	0.65	0.87
CYP51A1	CYP51A1	0.02	0.35	0.65	0.87
DAPK3	DAPK3	0.02	0.33	0.68	0.87
DDIT4	DDIT4	0.02	0.32	0.68	0.87
DLX2	DLX2	0.05	0.74	0.51	0.87
DMTF1	DMTF1	0.05	0.73	0.53	0.87
EFNB3	EFNB3	0.05	0.72	0.56	0.87
ERGIC1	ERGIC1	0.02	0.34	0.67	0.87
FAT1	FAT1	0.02	0.35	0.67	0.87
FDFT1	FDFT1	0.02	0.36	0.64	0.87
FEZ2	FEZ2	0.02	0.33	0.71	0.87
FFAR1	FFAR1	0.02	0.33	0.67	0.87
FXYD2	FXYD2	0.02	0.34	0.68	0.87
GALC	GALC	0.05	0.74	0.48	0.87
GATAD2B	GATAD2B	0.05	0.74	0.52	0.87
GPATCH8	GPATCH8	0.02	0.37	0.67	0.87
GPR156	GPR156	0.02	0.35	0.68	0.87
GPSM2	GPSM2	0.05	0.7	0.51	0.87
HHEX	HHEX	0.02	0.34	0.67	0.87
[truncated: 1,277 more rows]

## Sheet: Sheet1
	description	log2FoldChange_CS	log2FoldChange_NCS	log2FoldChange_Pvalue	log2FoldChange_FDR
AATF	AATF	0.21	3.21	0	0
ACACA	ACACA	0.24	3.76	0	0
ACACB	ACACB	0.19	3.07	0	0
ACE	ACE	-0.21	-3.24	0	0
ACVR1	ACVR1	0.2	3.14	0	0
ADC	ADC	0.23	3.42	0	0
ADCK4	ADCK4	-0.2	-3.29	0	0
ADH6	ADH6	-0.26	-3.82	0	0
ADK	ADK	0.24	3.74	0	0
ADO	ADO	0.32	4.51	0	0
ADORA3	ADORA3	0.21	3.13	0	0
ADRA2A	ADRA2A	0.19	3.08	0	0
AGT	AGT	0.26	3.9	0	0
AIFM1	AIFM1	-0.21	-3.32	0	0
AKAP8L	AKAP8L	0.23	3.43	0	0
AKR1A1	AKR1A1	-0.24	-3.71	0	0
AKT1	AKT1	0.23	3.32	0	0
AKT2	AKT2	0.22	3.32	0	0
ALDH2	ALDH2	-0.23	-3.66	0	0
ALG5	ALG5	0.25	3.72	0	0
ANO10	ANO10	0.25	3.7	0	0
AP2A2	AP2A2	0.22	3.34	0	0
ARF4	ARF4	-0.25	-3.89	0	0
ARHGAP35	ARHGAP35	0.21	3.14	0	0
ARHGDIB	ARHGDIB	-0.22	-3.51	0	0
ARNT	ARNT	0.21	3.2	0	0
ARNT2	ARNT2	0.25	3.72	0	0
ARNTL	ARNTL	0.26	3.87	0	0
ARPC1A	ARPC1A	0.19	3.08	0	0
ASF1A	ASF1A	0.22	3.45	0	0
ASF1B	ASF1B	-0.22	-3.58	0	0
ASGR2	ASGR2	0.25	3.84	0	0
ATG3	ATG3	0.22	3.32	0	0
ATG5	ATG5	-0.19	-3.19	0	0
ATG7	ATG7	0.21	3.08	0	0
ATOX1	ATOX1	0.25	3.82	0	0
ATP2A2	ATP2A2	0.27	4.05	0	0
ATP2B1	ATP2B1	0.22	3.37	0	0
ATP2C1	ATP2C1	0.21	3.32	0	0
ATP5D	ATP5D	0.19	3.06	0	0
AXIN2	AXIN2	0.21	3.23	0	0
B3GNT1	B3GNT1	0.24	3.57	0	0
B4GALT1	B4GALT1	0.2	3.12	0	0
B4GALT4	B4GALT4	0.2	3.06	0	0
BCKDHA	BCKDHA	0.19	3.06	0	0
BCL7B	BCL7B	0.28	4.41	0	0
BDKRB2	BDKRB2	0.2	3.18	0	0
BID	BID	0.2	3.11	0	0
BIRC5	BIRC5	0.2	3.1	0	0
BIRC6	BIRC6	0.22	3.61	0	0
BLVRA	BLVRA	0.23	3.52	0	0
BMP2	BMP2	0.22	3.66	0	0
BMPR1A	BMPR1A	0.22	3.36	0	0
BNIP3	BNIP3	0.22	3.4	0	0
BRCA1	BRCA1	-0.22	-3.27	0	0
BRPF3	BRPF3	0.3	4.65	0	0
CACNA1G	CACNA1G	0.2	3.17	0	0
CACNA2D3	CACNA2D3	-0.2	-3.3	0	0
CALML6	CALML6	-0.25	-3.74	0	0
CALR	CALR	0.21	3.22	0	0
CALU	CALU	-0.22	-3.46	0	0
CALY	CALY	-0.22	-3.41	0	0
CAMKK2	CAMKK2	0.21	3.21	0	0
CASP14	CASP14	0.21	3.11	0	0
CASP8	CASP8	0.22	3.29	0	0
CATSPER1	CATSPER1	0.26	4.11	0	0
CATSPER2	CATSPER2	0.26	4	0	0
CATSPER3	CATSPER3	0.26	4.11	0	0
CATSPER4	CATSPER4	0.26	4.16	0	0
CBS	CBS	-0.22	-3.18	0	0
CCKAR	CCKAR	-0.23	-3.55	0	0
CCNL1	CCNL1	-0.23	-3.6	0	0
CD83	CD83	0.26	4.08	0	0
CDC25A	CDC25A	0.2	3.17	0	0
CDC42	CDC42	-0.2	-3.42	0	0
CDIPT	CDIPT	-0.2	-3.26	0	0
CDK2	CDK2	0.25	3.73	0	0
CDK4	CDK4	0.21	3.13	0	0
CDK5	CDK5	0.22	3.37	0	0
CDK6	CDK6	0.22	3.5	0	0
CDK8	CDK8	0.22	3.36	0	0
CDK9	CDK9	0.19	3.08	0	0
CDKAL1	CDKAL1	-0.22	-3.56	0	0
CEBPA	CEBPA	0.25	3.64	0	0
CFLAR	CFLAR	0.21	3.19	0	0
CHAC1	CHAC1	0.21	3.51	0	0
CHEK2	CHEK2	0.22	3.38	0	0
CHIC2	CHIC2	0.23	3.49	0	0
CHMP2A	CHMP2A	0.2	3.11	0	0
CHRM3	CHRM3	0.22	3.24	0	0
CHRM5	CHRM5	0.21	3.17	0	0
CHRNB1	CHRNB1	0.22	3.37	0	0
CHRNB2	CHRNB2	0.18	3.08	0.01	0
CHRND	CHRND	0.22	3.39	0	0
CHRNE	CHRNE	0.22	3.4	0	0
CHRNG	CHRNG	0.22	3.29	0	0
CKS1B	CKS1B	-0.27	-3.92	0	0
CLK1	CLK1	-0.22	-3.46	0	0
CLK3	CLK3	0.27	4.18	0	0
CLPP	CLPP	0.21	3.27	0	0
CNOT4	CNOT4	0.2	3.22	0	0
COL13A1	COL13A1	0.22	3.18	0	0
CREG1	CREG1	0.26	3.95	0	0
CRY1	CRY1	-0.26	-3.84	0	0
CSAD	CSAD	0.3	4.58	0	0
CSF2RB	CSF2RB	0.2	3.07	0	0
CSNK1E	CSNK1E	0.22	3.43	0	0
CSNK1G2	CSNK1G2	0.26	3.76	0	0
CTNNB1	CTNNB1	-0.28	-4.29	0	0
CTSH	CTSH	0.2	3.19	0	0
CXCL2	CXCL2	0.24	3.54	0	0
CYCS	CYCS	0.28	4.28	0	0
CYP11B2	CYP11B2	0.22	3.38	0	0
CYP3A7	CYP3A7	0.22	3.39	0	0
DAGLA	DAGLA	0.26	4.06	0	0
DAGLB	DAGLB	0.26	4.08	0	0
DCK	DCK	0.28	4.49	0	0
DDB2	DDB2	-0.24	-3.55	0	0
DGCR14	DGCR14	-0.21	-3.3	0	0
DGKD	DGKD	-0.22	-3.72	0	0
DHCR7	DHCR7	0.24	3.55	0	0
DHRS2	DHRS2	0.25	3.74	0	0
DHX16	DHX16	0.24	3.58	0	0
DIDO1	DIDO1	0.28	4.47	0	0
DKC1	DKC1	-0.29	-4.64	0	0
DLGAP5	DLGAP5	0.21	3.3	0	0
DNA2	DNA2	-0.26	-4.12	0	0
DNAJC1	DNAJC1	0.23	3.51	0	0
DRD4	DRD4	0.2	3.22	0	0
DTNA	DTNA	0.24	3.57	0	0
DVL2	DVL2	0.21	3.55	0	0
DYNLL2	DYNLL2	0.22	3.37	0	0
DYRK3	DYRK3	0.25	3.69	0	0
EBP	EBP	0.21	3.18	0	0
ECSIT	ECSIT	0.2	3.32	0	0
EGF	EGF	0.21	3.4	0	0
EGFR	EGFR	0.22	3.27	0	0
EHHADH	EHHADH	-0.23	-3.71	0	0
EIF3H	EIF3H	0.19	3.16	0	0
EIF4G1	EIF4G1	-0.22	-3.33	0	0
ELF1	ELF1	-0.22	-3.51	0	0
ELK1	ELK1	-0.27	-4.02	0	0
EMD	EMD	-0.2	-3.25	0	0
ENOSF1	ENOSF1	0.25	3.96	0	0
ENTPD2	ENTPD2	0.2	3.19	0	0
ENTPD6	ENTPD6	0.2	3.13	0	0
EPAS1	EPAS1	0.23	3.28	0	0
EPC1	EPC1	0.22	3.27	0	0
EPN2	EPN2	0.26	3.99	0	0
EPO	EPO	0.2	3.1	0	0
ERCC6L	ERCC6L	0.27	3.75	0	0
ERG	ERG	0.22	3.46	0	0
ERH	ERH	0.2	3.21	0	0
ESRRB	ESRRB	0.21	3.3	0	0
ETV4	ETV4	-0.21	-3.2	0	0
F2RL1	F2RL1	-0.22	-3.42	0	0
F9	F9	0.24	3.52	0	0
FADS3	FADS3	-0.22	-3.44	0	0
FAS	FAS	0.28	4.29	0	0
FBXO7	FBXO7	0.23	3.55	0	0
FDPS	FDPS	0.24	3.98	0	0
FGA	FGA	0.23	3.5	0	0
FGFR3	FGFR3	-0.21	-3.3	0	0
FOLR1	FOLR1	0.2	3.3	0	0
FOXR1	FOXR1	0.24	3.53	0	0
FPR1	FPR1	0.21	3.19	0.01	0
FRAT1	FRAT1	0.21	3.36	0	0
FTL	FTL	0.2	3.07	0	0
GAA	GAA	0.21	3.16	0	0
GALNS	GALNS	-0.27	-4.06	0	0
GAMT	GAMT	-0.21	-3.19	0	0
GAS6	GAS6	-0.21	-3.34	0	0
GATA3	GATA3	0.22	3.17	0	0
GATAD1	GATAD1	0.22	3.41	0	0
GCA	GCA	0.24	3.83	0	0
GCH1	GCH1	0.23	3.47	0	0
GDI1	GDI1	-0.23	-3.41	0	0
GDPD5	GDPD5	-0.23	-3.65	0	0
GGCX	GGCX	0.2	3.13	0	0
GGH	GGH	0.2	3.19	0	0
GLRA2	GLRA2	0.26	4.24	0	0
GLRA3	GLRA3	0.26	4.01	0	0
GMPS	GMPS	0.27	3.85	0	0
GNE	GNE	0.25	3.61	0	0
GPC1	GPC1	0.22	3.55	0	0
GPI	GPI	0.25	3.83	0	0
GPR123	GPR123	-0.24	-3.4	0	0
GPR141	GPR141	0.2	3.19	0	0
GPR152	GPR152	0.24	3.81	0	0
GPR153	GPR153	0.26	3.92	0	0
GPR83	GPR83	-0.22	-3.32	0	0
GPRC6A	GPRC6A	0.22	3.41	0	0
GPX1	GPX1	-0.23	-3.63	0	0
GPX2	GPX2	0.23	3.46	0	0
GRK5	GRK5	0.22	3.43	0	0
GRM2	GRM2	-0.21	-3.19	0	0
GRM3	GRM3	-0.22	-3.44	0	0
GSDMB	GSDMB	-0.27	-4	0	0
GUK1	GUK1	-0.23	-3.5	0	0
GYG1	GYG1	-0.26	-3.86	0	0
HAL	HAL	0.22	3.4	0	0
HCAR2	HCAR2	-0.21	-3.21	0	0
HCRTR2	HCRTR2	0.19	3.11	0	0
HK1	HK1	-0.24	-3.66	0	0
HLA-DMA	HLA-DMA	0.3	4.56	0	0
HLA-DQA1	HLA-DQA1	0.24	3.61	0	0
HLA-DRB3	HLA-DRB3	0.2	3.12	0	0
HMGCS1	HMGCS1	0.22	3.25	0	0
HNF1B	HNF1B	0.21	3.2	0	0
HORMAD2	HORMAD2	-0.23	-3.69	0	0
HOXA1	HOXA1	0.27	4.13	0	0
HOXA9	HOXA9	0.21	3.23	0	0
HOXB4	HOXB4	-0.25	-4.05	0	0
HPD	HPD	0.25	3.79	0	0
HRH3	HRH3	-0.22	-3.31	0	0
HS2ST1	HS2ST1	0.26	3.9	0	0
HSPA2	HSPA2	-0.25	-3.88	0	0
HSPA9	HSPA9	0.28	4.37	0	0
HTATIP2	HTATIP2	0.21	3.33	0	0
HTATSF1	HTATSF1	-0.22	-3.59	0	0
HYOU1	HYOU1	0.29	4.23	0	0
IARS2	IARS2	0.21	3.49	0	0
ICAM1	ICAM1	0.25	3.87	0	0
ID1	ID1	0.19	3.24	0	0
IDE	IDE	0.2	3.17	0	0
IGBP1	IGBP1	-0.29	-4.31	0	0
IGF1	IGF1	0.2	3.12	0	0
IGFBP5	IGFBP5	0.21	3.1	0	0
IGFBP7	IGFBP7	-0.23	-3.41	0	0
IKBKB	IKBKB	0.27	4.18	0	0
IL15	IL15	0.25	3.73	0	0
IL1R1	IL1R1	0.2	3.08	0	0
IL6ST	IL6ST	0.2	3.23	0	0
ILK	ILK	0.22	3.41	0	0
ING3	ING3	0.23	3.54	0	0
INPP5D	INPP5D	0.24	3.76	0	0
IRS1	IRS1	0.29	4.38	0	0
ISX	ISX	0.21	3.53	0	0
ITGA2	ITGA2	0.22	3.43	0	0
KCND2	KCND2	-0.25	-3.73	0	0
KCNJ10	KCNJ10	0.21	3.42	0	0
KCNJ12	KCNJ12	-0.22	-3.49	0	0
KCNK1	KCNK1	0.21	3.36	0	0
KCNQ2	KCNQ2	0.23	3.49	0	0
KCNQ4	KCNQ4	0.23	3.51	0	0
KDM5A	KDM5A	-0.21	-3.31	0	0
KIAA0196	KIAA0196	0.23	3.6	0	0
KIAA0317	KIAA0317	-0.21	-3.24	0	0
KIF11	KIF11	0.26	3.82	0	0
KLK6	KLK6	-0.25	-3.73	0	0
KNG1	KNG1	-0.24	-3.62	0	0
KREMEN1	KREMEN1	0.23	3.32	0	0
KRT25	KRT25	0.26	4.1	0	0
LAMB1	LAMB1	0.22	3.55	0	0
LIAS	LIAS	0.26	3.87	0	0
LIPH	LIPH	0.24	3.78	0	0
LMNA	LMNA	-0.24	-3.87	0	0
LPAR5	LPAR5	0.24	3.66	0	0
LRRC18	LRRC18	-0.22	-3.33	0	0
LRRK2	LRRK2	0.21	3.19	0	0
LRSAM1	LRSAM1	0.29	4.48	0	0
LTA4H	LTA4H	-0.21	-3.24	0	0
LTBR	LTBR	0.22	3.4	0	0
MACF1	MACF1	0.21	3.22	0	0
MAD2L1BP	MAD2L1BP	0.2	3.22	0	0
MAP3K14	MAP3K14	0.22	3.28	0	0
MAP3K2	MAP3K2	-0.21	-3.26	0	0
MAP7	MAP7	0.28	4.23	0	0
MAPK10	MAPK10	0.21	3.26	0	0
MAPK12	MAPK12	0.23	3.65	0	0
MAPK8IP1	MAPK8IP1	0.22	3.55	0	0
MAPKAPK5	MAPKAPK5	0.28	3.83	0	0
MBNL1	MBNL1	0.22	3.33	0	0
MCL1	MCL1	0.2	3.41	0	0
MCM5	MCM5	-0.2	-3.23	0	0
MCOLN1	MCOLN1	-0.24	-3.62	0	0
MED12L	MED12L	0.22	3.63	0	0
MED21	MED21	0.21	3.28	0	0
MED28	MED28	0.21	3.08	0	0
MED7	MED7	-0.23	-3.33	0	0
MEN1	MEN1	0.22	3.7	0	0
MFHAS1	MFHAS1	0.22	3.25	0	0
MGAT1	MGAT1	0.23	3.71	0	0
MGST2	MGST2	0.2	3.11	0	0
MMP14	MMP14	0.2	3.1	0	0
MMP7	MMP7	-0.25	-3.76	0	0
MNAT1	MNAT1	0.21	3.15	0	0
MTA3	MTA3	-0.24	-3.6	0	0
MTERFD1	MTERFD1	0.21	3.37	0	0
MTNR1A	MTNR1A	-0.2	-3.37	0	0
MXD3	MXD3	-0.21	-3.38	0	0
MYBL2	MYBL2	0.22	3.22	0	0
MYCN	MYCN	0.2	3.29	0	0
MYD88	MYD88	0.21	3.41	0	0
MYLK	MYLK	0.19	3.27	0	0
MYNN	MYNN	-0.21	-3.37	0	0
NAB2	NAB2	0.29	4.71	0	0
NARFL	NARFL	0.22	3.34	0	0
NARS	NARS	0.21	3.27	0	0
NAT1	NAT1	-0.28	-4.27	0	0
NCOA2	NCOA2	0.26	3.92	0	0
NDUFA5	NDUFA5	0.24	3.68	0	0
NDUFA9	NDUFA9	-0.25	-3.79	0	0
NEK6	NEK6	-0.23	-3.56	0	0
NET1	NET1	0.26	3.92	0	0
NFKB1	NFKB1	0.25	3.98	0	0
NFKBIB	NFKBIB	0.2	3.19	0	0
NFYB	NFYB	0.22	3.5	0	0
NKX2-3	NKX2-3	0.21	3.17	0	0
NME9	NME9	0.3	4.56	0	0
NMI	NMI	-0.22	-3.31	0	0
NOL3	NOL3	0.23	3.31	0	0
NOSIP	NOSIP	0.22	3.48	0	0
NOX1	NOX1	0.2	3.23	0	0
NPC1L1	NPC1L1	0.29	4.47	0	0
NPEPL1	NPEPL1	0.22	3.31	0	0
NPY1R	NPY1R	0.21	3.48	0	0
NQO1	NQO1	0.2	3.06	0	0
NR1H4	NR1H4	0.21	3.36	0	0
NR2C2	NR2C2	-0.21	-3.24	0	0
NR5A2	NR5A2	0.22	3.74	0	0
NRBP1	NRBP1	0.22	3.49	0	0
NT5C2	NT5C2	0.23	3.39	0	0
O3FAR1	O3FAR1	-0.24	-3.7	0	0
OAZ1	OAZ1	0.25	3.7	0	0
OPA1	OPA1	0.22	3.37	0	0
OR5W2	OR5W2	0.25	3.75	0	0
ORC1	ORC1	-0.23	-3.65	0	0
OVOL2	OVOL2	0.2	3.07	0	0
P4HTM	P4HTM	0.24	3.87	0	0
PC	PC	0.2	3.06	0	0
PCGF3	PCGF3	-0.25	-3.68	0	0
PCSK7	PCSK7	-0.26	-4.15	0	0
PDPK1	PDPK1	0.21	3.31	0	0
PGRMC1	PGRMC1	-0.21	-3.27	0	0
PHF16	PHF16	-0.21	-3.36	0	0
PHYH	PHYH	0.24	3.53	0	0
PI4KAP2	PI4KAP2	0.22	3.3	0	0
PIAS1	PIAS1	-0.29	-4.38	0	0
PIAS3	PIAS3	-0.21	-3.4	0	0
PIK3R4	PIK3R4	0.21	3.11	0	0
PIM1	PIM1	0.29	4.44	0	0
PIP4K2C	PIP4K2C	0.21	3.23	0	0
PJA2	PJA2	0.24	3.36	0	0
PKN2	PKN2	0.22	3.49	0	0
PLA2G2D	PLA2G2D	0.23	3.48	0	0
PLA2G4A	PLA2G4A	0.32	5.22	0	0
PLCL1	PLCL1	0.23	3.29	0	0
PLXNA1	PLXNA1	0.2	3.07	0	0
PNPO	PNPO	0.24	3.78	0	0
POLD4	POLD4	0.23	3.74	0	0
POLR2A	POLR2A	0.26	3.94	0	0
POLR2C	POLR2C	-0.27	-4.27	0	0
POLRMT	POLRMT	0.2	3.21	0	0
PPIB	PPIB	-0.23	-3.68	0	0
PPP2R3A	PPP2R3A	0.25	3.99	0	0
PPT1	PPT1	0.22	3.32	0	0
PRDX1	PRDX1	-0.23	-3.45	0	0
PRDX5	PRDX5	0.2	3.21	0	0
PRKCA	PRKCA	0.23	3.64	0	0
PRKCD	PRKCD	0.24	3.59	0	0
PRKCI	PRKCI	0.23	3.43	0	0
PRKD2	PRKD2	0.21	3.29	0	0
PRMT2	PRMT2	-0.29	-4.4	0	0
PROC	PROC	0.24	3.49	0	0
PROCR	PROCR	0.24	4.07	0	0
PROKR1	PROKR1	-0.23	-3.54	0	0
PRPF4	PRPF4	0.21	3.28	0	0
PSMA3	PSMA3	0.23	3.51	0	0
PSMB7	PSMB7	0.22	3.25	0	0
PSMB8	PSMB8	-0.21	-3.23	0	0
PTGFR	PTGFR	0.24	3.69	0	0
PTRF	PTRF	0.21	3.13	0	0
PTTG1	PTTG1	0.22	3.43	0	0
PYCR1	PYCR1	0.2	3.1	0	0
QPRT	QPRT	0.21	3.1	0	0
RAC1	RAC1	0.22	3.43	0	0
RANBP9	RANBP9	0.22	3.26	0	0
RAP1A	RAP1A	0.25	3.88	0	0
RARB	RARB	-0.23	-3.32	0	0
RASSF2	RASSF2	0.25	3.94	0	0
RBCK1	RBCK1	0.23	3.61	0	0
RBMX	RBMX	0.25	3.67	0	0
RCCD1	RCCD1	-0.2	-3.2	0	0
RFC2	RFC2	0.24	3.83	0	0
RFX5	RFX5	0.22	3.38	0	0
RFXANK	RFXANK	-0.24	-3.64	0	0
RGS19	RGS19	0.21	3.27	0	0
RNASE4	RNASE4	-0.26	-3.91	0	0
RNF125	RNF125	-0.21	-3.32	0	0
RNF166	RNF166	-0.22	-3.72	0	0
RNF5	RNF5	-0.21	-3.44	0	0
ROCK2	ROCK2	0.22	3.54	0	0
ROS1	ROS1	0.23	3.41	0	0
RPS14	RPS14	0.21	3.28	0	0
RPS19	RPS19	-0.22	-3.28	0	0
RTEL1	RTEL1	-0.22	-3.28	0	0
RUVBL2	RUVBL2	0.24	3.5	0	0
S100Z	S100Z	-0.21	-3.38	0	0
SCCPDH	SCCPDH	0.28	4.25	0	0
SCN10A	SCN10A	0.2	3.06	0	0
SCN9A	SCN9A	0.21	3.24	0	0
SDHD	SDHD	0.23	3.52	0	0
SEC24D	SEC24D	0.21	3.15	0	0
SERINC3	SERINC3	0.22	3.43	0	0
SERPINB5	SERPINB5	0.21	3.15	0	0
SGK1	SGK1	-0.24	-3.59	0	0
SIAH2	SIAH2	0.23	3.52	0	0
SIRT2	SIRT2	0.21	3.23	0	0
SIRT3	SIRT3	0.22	3.29	0	0
SLC1A5	SLC1A5	-0.22	-3.3	0	0
SLC22A5	SLC22A5	-0.24	-3.52	0	0
SLC39A6	SLC39A6	-0.22	-3.4	0	0
SNF8	SNF8	0.26	4.41	0	0
SOAT1	SOAT1	0.22	3.57	0	0
SOD1	SOD1	0.28	4.47	0	0
SPAG4	SPAG4	0.2	3.12	0	0
SPHK2	SPHK2	0.22	3.08	0	0
SPIC	SPIC	0.22	3.75	0	0
SPP1	SPP1	0.25	3.84	0	0
SPTLC2	SPTLC2	0.31	4.98	0	0
SRM	SRM	0.22	3.45	0	0
SRPRB	SRPRB	0.21	3.32	0	0
SSTR1	SSTR1	0.24	3.58	0	0
SSTR2	SSTR2	0.24	3.6	0	0
SSTR3	SSTR3	0.24	3.83	0	0
SSTR4	SSTR4	0.21	3.36	0	0
SSTR5	SSTR5	0.24	3.64	0	0
ST3GAL5	ST3GAL5	0.22	3.4	0	0
ST7	ST7	0.29	4.21	0	0
STAM	STAM	0.21	3.26	0	0
STK36	STK36	-0.21	-3.23	0	0
STK38	STK38	-0.24	-3.6	0	0
STK39	STK39	0.21	3.34	0	0
STRN4	STRN4	0.24	3.78	0	0
STX4	STX4	-0.21	-3.25	0	0
SUCLA2	SUCLA2	0.2	3.21	0	0
SUCLG2	SUCLG2	0.24	3.83	0	0
ABCG2	ABCG2	-0.21	-3.05	0	0.01
ACSL3	ACSL3	0.19	2.8	0	0.01
ADCY9	ADCY9	-0.19	-2.9	0.01	0.01
ADORA1	ADORA1	0.19	2.87	0	0.01
ADRA1A	ADRA1A	0.18	2.91	0	0.01
ADRA2C	ADRA2C	0.18	2.84	0.01	0.01
AKAP11	AKAP11	0.22	3.03	0	0.01
AKT3	AKT3	0.19	3.02	0	0.01
ALDH1A2	ALDH1A2	0.19	2.91	0	0.01
ALDOC	ALDOC	-0.21	-3.15	0	0.01
ALOX12	ALOX12	-0.18	-2.89	0	0.01
AMIGO3	AMIGO3	0.18	2.81	0	0.01
ANKRD10	ANKRD10	0.19	2.89	0	0.01
ANKRD37	ANKRD37	-0.2	-2.92	0	0.01
AOX1	AOX1	0.17	2.81	0.01	0.01
ARG2	ARG2	0.2	3.06	0	0.01
ARGLU1	ARGLU1	0.18	2.8	0	0.01
ARPC3	ARPC3	0.19	2.97	0	0.01
ASMTL	ASMTL	-0.2	-3.04	0	0.01
ATP5H	ATP5H	-0.18	-2.93	0	0.01
ATP6V1D	ATP6V1D	0.18	2.94	0	0.01
AURKB	AURKB	0.19	2.99	0	0.01
BAG6	BAG6	-0.2	-3.1	0	0.01
BATF3	BATF3	-0.19	-2.97	0.01	0.01
BLOC1S1	BLOC1S1	0.19	3.03	0	0.01
BRAP	BRAP	0.2	3	0	0.01
BRCA2	BRCA2	0.19	2.82	0	0.01
BRD2	BRD2	0.19	2.85	0	0.01
BRD8	BRD8	-0.19	-3.02	0	0.01
BTK	BTK	-0.18	-2.99	0	0.01
BUB1B	BUB1B	-0.19	-2.99	0	0.01
C2CD2	C2CD2	-0.22	-3.12	0	0.01
C3	C3	-0.19	-3	0	0.01
CA6	CA6	0.2	3	0	0.01
CA7	CA7	-0.2	-3.02	0	0.01
CACNA1I	CACNA1I	0.19	2.97	0	0.01
CACNA2D1	CACNA2D1	-0.19	-2.94	0	0.01
CAMK2D	CAMK2D	0.19	3.03	0	0.01
CARS	CARS	0.19	2.83	0	0.01
CBR3	CBR3	0.19	2.81	0	0.01
CCDC86	CCDC86	-0.21	-3.06	0	0.01
CCND1	CCND1	-0.19	-2.91	0	0.01
CCNE1	CCNE1	-0.19	-3.01	0	0.01
CCNE2	CCNE2	0.19	3.03	0	0.01
CD24	CD24	-0.19	-3	0	0.01
CDC7	CDC7	0.19	2.81	0	0.01
CEP72	CEP72	0.19	2.94	0	0.01
CETN2	CETN2	0.21	3.04	0	0.01
CHKB	CHKB	0.18	2.8	0.01	0.01
CHRNA6	CHRNA6	-0.21	-3.08	0	0.01
CLASRP	CLASRP	-0.19	-3.07	0	0.01
CNNM2	CNNM2	-0.2	-2.93	0	0.01
COG4	COG4	0.19	3.03	0	0.01
CPT2	CPT2	0.19	2.99	0	0.01
CRYZ	CRYZ	0.19	2.96	0.01	0.01
CSDA	CSDA	-0.18	-2.96	0	0.01
CYB5B	CYB5B	-0.2	-3.11	0	0.01
CYC1	CYC1	-0.19	-3.06	0	0.01
CYP11A1	CYP11A1	-0.2	-3	0	0.01
CYP11B1	CYP11B1	-0.2	-2.89	0	0.01
CYP2A6	CYP2A6	0.2	2.98	0	0.01
CYP2B6	CYP2B6	0.18	2.88	0	0.01
DCTN6	DCTN6	-0.2	-3.05	0	0.01
DECR1	DECR1	-0.2	-2.94	0	0.01
DNAJB9	DNAJB9	0.2	2.9	0	0.01
DRD3	DRD3	0.19	2.98	0	0.01
DTX3L	DTX3L	-0.21	-3.11	0	0.01
DUT	DUT	0.18	2.83	0	0.01
DYNLL1	DYNLL1	0.19	2.91	0	0.01
EED	EED	-0.2	-2.94	0	0.01
EHF	EHF	-0.2	-3.13	0	0.01
EIF2AK3	EIF2AK3	0.2	3.05	0	0.01
EIF3J	EIF3J	-0.2	-3.14	0	0.01
EIF4A2	EIF4A2	0.19	2.98	0	0.01
EIF5A	EIF5A	-0.2	-3.16	0	0.01
ELK3	ELK3	-0.17	-2.86	0.01	0.01
ENTPD1	ENTPD1	0.2	2.96	0	0.01
ENTPD3	ENTPD3	0.17	2.82	0	0.01
ERCC5	ERCC5	0.19	2.94	0.01	0.01
EXOSC8	EXOSC8	0.2	3.05	0	0.01
EXT1	EXT1	-0.2	-2.89	0	0.01
EXT2	EXT2	-0.2	-2.93	0	0.01
F2R	F2R	0.2	2.95	0	0.01
FAM120A	FAM120A	0.19	3.02	0	0.01
FBXO21	FBXO21	-0.18	-3.09	0	0.01
FGFR1OP	FGFR1OP	-0.18	-2.89	0	0.01
FKBP14	FKBP14	-0.19	-2.89	0	0.01
FOXN3	FOXN3	-0.2	-3.04	0	0.01
FTSJ1	FTSJ1	-0.21	-3.13	0	0.01
FUS	FUS	-0.21	-2.91	0	0.01
FZD5	FZD5	0.2	3.02	0	0.01
G2E3	G2E3	0.19	2.96	0	0.01
GABBR1	GABBR1	-0.21	-3.09	0	0.01
GABBR2	GABBR2	0.19	2.88	0	0.01
GABRA4	GABRA4	0.19	2.83	0	0.01
GATA1	GATA1	-0.18	-2.87	0	0.01
GATA2	GATA2	-0.21	-3.1	0	0.01
GATA6	GATA6	-0.19	-2.94	0	0.01
GBF1	GBF1	0.19	2.8	0	0.01
GBGT1	GBGT1	-0.21	-3.14	0	0.01
GBP2	GBP2	-0.19	-3.01	0	0.01
GGCT	GGCT	0.19	2.91	0	0.01
GNAI2	GNAI2	0.18	2.86	0	0.01
GPR172A	GPR172A	0.2	2.88	0	0.01
GPR37	GPR37	-0.2	-3.04	0	0.01
GPX7	GPX7	0.19	3.04	0	0.01
GRIA3	GRIA3	0.19	2.95	0	0.01
GRIA4	GRIA4	0.19	2.93	0	0.01
GRPR	GRPR	-0.19	-2.94	0	0.01
GSTP1	GSTP1	-0.2	-3.03	0	0.01
GTF2F2	GTF2F2	-0.18	-2.86	0.01	0.01
GTF3C2	GTF3C2	-0.2	-3	0	0.01
HADH	HADH	0.19	2.87	0	0.01
HLA-A	HLA-A	0.19	2.86	0	0.01
HMGB3	HMGB3	0.2	3.03	0	0.01
HOXB2	HOXB2	-0.19	-3.04	0	0.01
HS3ST3A1	HS3ST3A1	0.19	2.96	0	0.01
HSD17B1	HSD17B1	-0.2	-3.04	0	0.01
HSPB8	HSPB8	0.19	2.93	0	0.01
HTR2C	HTR2C	0.19	2.85	0	0.01
HTRA1	HTRA1	-0.2	-3.11	0	0.01
IDH1	IDH1	-0.22	-3.15	0	0.01
IFNGR2	IFNGR2	-0.2	-2.94	0	0.01
IFRD2	IFRD2	-0.19	-2.9	0	0.01
IL11	IL11	0.19	2.97	0	0.01
IL12A	IL12A	0.21	3	0	0.01
IL13RA1	IL13RA1	-0.19	-2.87	0	0.01
IL20	IL20	0.18	2.85	0	0.01
IL4R	IL4R	0.2	2.97	0	0.01
IL5RA	IL5RA	0.2	2.95	0	0.01
ILF2	ILF2	-0.2	-3.11	0	0.01
IMPDH1	IMPDH1	-0.19	-2.96	0	0.01
ITK	ITK	-0.19	-2.88	0	0.01
JAK2	JAK2	-0.19	-3.04	0	0.01
KCNK9	KCNK9	-0.21	-3.08	0	0.01
KCNN2	KCNN2	0.19	2.88	0	0.01
KCNN3	KCNN3	0.19	2.84	0	0.01
KDM4B	KDM4B	-0.2	-3.13	0	0.01
KDR	KDR	0.19	2.85	0	0.01
KIAA1279	KIAA1279	-0.18	-2.86	0	0.01
KITLG	KITLG	-0.19	-3	0	0.01
KLF10	KLF10	-0.21	-3	0	0.01
KLF4	KLF4	-0.18	-2.91	0.01	0.01
KLHDC2	KLHDC2	0.2	2.96	0	0.01
KRT19	KRT19	0.2	3.02	0	0.01
KRT7	KRT7	0.2	3	0	0.01
LEPREL1	LEPREL1	-0.19	-2.97	0	0.01
LRP10	LRP10	-0.19	-2.88	0	0.01
MAP2K1	MAP2K1	-0.2	-3.16	0	0.01
MAP2K2	MAP2K2	-0.19	-2.92	0	0.01
MAP2K3	MAP2K3	0.19	2.93	0	0.01
MAP3K4	MAP3K4	0.19	2.95	0	0.01
MAP4K4	MAP4K4	0.19	3.04	0	0.01
MBNL2	MBNL2	-0.19	-2.92	0	0.01
ME1	ME1	-0.2	-3.05	0	0.01
MED15	MED15	-0.2	-3.15	0	0.01
MKI67IP	MKI67IP	0.18	2.8	0	0.01
MSMO1	MSMO1	0.18	2.9	0.01	0.01
NAGA	NAGA	-0.19	-2.92	0	0.01
NASP	NASP	-0.21	-3.06	0	0.01
NCOA4	NCOA4	0.2	3	0	0.01
NDFIP1	NDFIP1	-0.21	-3.18	0	0.01
NDUFB3	NDUFB3	0.19	2.9	0	0.01
NOD1	NOD1	-0.19	-3.01	0	0.01
NPTN	NPTN	0.2	3.04	0	0.01
NR1I3	NR1I3	-0.18	-2.86	0	0.01
NR3C1	NR3C1	0.2	3.03	0	0.01
NTRK2	NTRK2	0.19	2.99	0	0.01
NUCB2	NUCB2	0.19	2.99	0	0.01
NUP88	NUP88	-0.2	-2.89	0	0.01
NVL	NVL	0.2	2.95	0	0.01
OLIG3	OLIG3	-0.2	-3.01	0	0.01
OPRD1	OPRD1	0.2	2.88	0.01	0.01
OR52B2	OR52B2	-0.18	-2.87	0	0.01
OSR1	OSR1	-0.19	-3.16	0	0.01
OXCT1	OXCT1	0.19	2.96	0	0.01
P2RX1	P2RX1	0.19	2.86	0	0.01
PAF1	PAF1	0.2	3.04	0	0.01
PAK2	PAK2	0.17	2.84	0	0.01
PASD1	PASD1	0.19	3.05	0	0.01
PCBD1	PCBD1	0.19	2.85	0	0.01
PDE4C	PDE4C	0.19	2.87	0	0.01
PDX1	PDX1	-0.19	-2.96	0	0.01
PECR	PECR	-0.18	-3.03	0	0.01
PHF13	PHF13	-0.19	-2.89	0.01	0.01
PHF23	PHF23	0.2	3.03	0	0.01
PIK3CB	PIK3CB	-0.19	-2.86	0	0.01
PISD	PISD	-0.19	-2.97	0	0.01
PKIA	PKIA	0.18	2.83	0	0.01
PLA2G1B	PLA2G1B	0.2	2.96	0	0.01
PLA2G2A	PLA2G2A	0.19	2.88	0	0.01
PLD1	PLD1	0.18	2.86	0	0.01
PLP2	PLP2	0.18	2.93	0.01	0.01
PML	PML	0.17	2.82	0.01	0.01
PNKP	PNKP	0.19	2.96	0	0.01
POLR3B	POLR3B	-0.21	-3.16	0	0.01
POLR3C	POLR3C	-0.2	-3.07	0	0.01
PPIF	PPIF	0.19	2.8	0	0.01
PRDM1	PRDM1	0.2	3	0	0.01
PRR15L	PRR15L	0.2	2.97	0	0.01
PRSS3	PRSS3	-0.19	-2.95	0	0.01
PSMB10	PSMB10	-0.2	-3.17	0	0.01
PSMB5	PSMB5	-0.2	-2.96	0	0.01
PSMB9	PSMB9	0.19	3.03	0	0.01
PSMD4	PSMD4	0.18	3	0	0.01
PSMD9	PSMD9	-0.18	-2.88	0	0.01
PSPH	PSPH	0.19	2.87	0	0.01
PTMS	PTMS	0.18	2.81	0.01	0.01
PTPN12	PTPN12	0.2	2.92	0	0.01
PTPRF	PTPRF	-0.21	-3.15	0	0.01
PUS10	PUS10	0.18	2.88	0	0.01
PYCRL	PYCRL	-0.18	-2.86	0	0.01
QRSL1	QRSL1	-0.2	-3.06	0	0.01
RAF1	RAF1	0.19	3.03	0	0.01
RBKS	RBKS	0.2	2.96	0	0.01
RETSAT	RETSAT	0.18	2.93	0	0.01
RGS16	RGS16	0.18	2.8	0	0.01
RIOK2	RIOK2	-0.18	-3	0	0.01
RNF186	RNF186	0.19	2.95	0	0.01
RPS6KL1	RPS6KL1	-0.2	-3.11	0	0.01
RRM1	RRM1	-0.18	-2.89	0	0.01
RRM2	RRM2	-0.19	-2.9	0.01	0.01
RUFY1	RUFY1	0.2	2.98	0	0.01
RUNX1	RUNX1	-0.19	-2.89	0	0.01
RUVBL1	RUVBL1	-0.19	-2.87	0	0.01
S100P	S100P	-0.2	-2.93	0	0.01
SC5DL	SC5DL	-0.19	-3	0.01	0.01
SEC61A2	SEC61A2	0.2	3.04	0	0.01
SERPINA5	SERPINA5	-0.2	-3.07	0	0.01
SIRPG	SIRPG	-0.18	-2.88	0	0.01
SLC16A6	SLC16A6	-0.17	-2.86	0	0.01
SLC22A2	SLC22A2	-0.18	-2.96	0	0.01
SLC25A32	SLC25A32	-0.2	-3.13	0	0.01
SLC25A46	SLC25A46	0.19	3	0	0.01
SLC36A1	SLC36A1	0.2	2.94	0	0.01
SMARCA5	SMARCA5	-0.18	-2.92	0	0.01
SMARCB1	SMARCB1	0.19	2.9	0	0.01
SMURF1	SMURF1	0.2	3.05	0	0.01
SOX10	SOX10	0.19	2.85	0	0.01
SREBF1	SREBF1	-0.19	-2.87	0	0.01
SRGAP2	SRGAP2	-0.2	-2.98	0	0.01
STAT1	STAT1	-0.19	-2.86	0	0.01
STK33	STK33	0.19	2.9	0	0.01
SUZ12	SUZ12	-0.2	-3.06	0	0.01
ABHD2	ABHD2	0.18	2.76	0	0.02
ABL2	ABL2	0.19	2.79	0	0.02
ADAM15	ADAM15	-0.18	-2.79	0	0.02
ADAM17	ADAM17	-0.19	-2.75	0	0.02
AIRE	AIRE	-0.18	-2.83	0	0.02
AKR1C2	AKR1C2	0.18	2.71	0	0.02
ALAS1	ALAS1	0.17	2.76	0	0.02
AXIN1	AXIN1	-0.17	-2.8	0.01	0.02
BARX1	BARX1	0.18	2.77	0	0.02
BCL2	BCL2	0.17	2.78	0	0.02
BCL6	BCL6	-0.17	-2.74	0.01	0.02
BRAF	BRAF	0.17	2.68	0.01	0.02
BRPF1	BRPF1	0.18	2.71	0	0.02
CACNB2	CACNB2	-0.17	-2.8	0.01	0.02
CARD10	CARD10	0.17	2.67	0.01	0.02
CERK	CERK	-0.18	-2.73	0	0.02
CHEK1	CHEK1	-0.19	-2.82	0	0.02
CHRM1	CHRM1	0.17	2.73	0.01	0.02
CHRNA1	CHRNA1	0.16	2.69	0.02	0.02
CREM	CREM	0.17	2.68	0	0.02
CTDSP1	CTDSP1	0.17	2.67	0	0.02
CTPS	CTPS	0.18	2.72	0	0.02
CYP2D6	CYP2D6	0.17	2.72	0	0.02
DICER1	DICER1	0.17	2.71	0.01	0.02
DMD	DMD	0.18	2.77	0	0.02
DMRTB1	DMRTB1	-0.19	-2.85	0	0.02
DSG2	DSG2	0.17	2.68	0.01	0.02
DUSP3	DUSP3	-0.18	-2.75	0	0.02
EBNA1BP2	EBNA1BP2	-0.18	-2.8	0	0.02
EPHA2	EPHA2	-0.18	-2.79	0.01	0.02
EPHA7	EPHA7	-0.17	-2.76	0	0.02
ERBB2	ERBB2	0.17	2.75	0.01	0.02
ESR1	ESR1	0.16	2.69	0.01	0.02
ETNK1	ETNK1	0.18	2.71	0.01	0.02
ETS2	ETS2	0.17	2.74	0	0.02
ETV1	ETV1	-0.19	-2.73	0	0.02
EXOC2	EXOC2	-0.18	-2.75	0.01	0.02
FAP	FAP	0.18	2.72	0.01	0.02
FCHO1	FCHO1	0.19	2.77	0	0.02
FGF2	FGF2	0.17	2.69	0.01	0.02
FOSL1	FOSL1	0.18	2.79	0	0.02
FOXO1	FOXO1	-0.18	-2.8	0.01	0.02
FPGS	FPGS	-0.19	-2.83	0	0.02
GCLM	GCLM	-0.18	-2.78	0.01	0.02
GLRB	GLRB	-0.19	-2.82	0.01	0.02
GPR137	GPR137	0.19	2.72	0	0.02
GPR19	GPR19	0.18	2.71	0	0.02
GSK3A	GSK3A	-0.19	-2.82	0	0.02
GSK3B	GSK3B	0.18	2.77	0.01	0.02
HBE1	HBE1	0.18	2.73	0	0.02
HBP1	HBP1	-0.18	-2.77	0.01	0.02
HCN3	HCN3	-0.18	-2.82	0	0.02
HCRTR1	HCRTR1	0.19	2.77	0	0.02
HLA-DRB4	HLA-DRB4	0.17	2.7	0	0.02
HOXC4	HOXC4	0.18	2.76	0	0.02
HPSE	HPSE	0.16	2.69	0.01	0.02
HSF1	HSF1	0.18	2.74	0.01	0.02
HSF5	HSF5	0.18	2.71	0	0.02
HSPA5	HSPA5	0.17	2.68	0.01	0.02
HTR1A	HTR1A	0.18	2.77	0	0.02
IL12B	IL12B	0.18	2.72	0	0.02
IL2	IL2	0.17	2.76	0.01	0.02
IL23R	IL23R	0.18	2.78	0	0.02
IQGAP1	IQGAP1	-0.19	-2.82	0	0.02
IRF6	IRF6	-0.18	-2.82	0	0.02
KCNA10	KCNA10	0.18	2.79	0	0.02
LYN	LYN	-0.17	-2.73	0	0.02
LZIC	LZIC	0.17	2.72	0.01	0.02
MAOA	MAOA	-0.2	-2.79	0	0.02
MAP4K3	MAP4K3	-0.18	-2.74	0	0.02
MBTPS1	MBTPS1	0.18	2.69	0	0.02
MCM6	MCM6	0.19	2.76	0.01	0.02
MTHFD1	MTHFD1	0.17	2.76	0.01	0.02
MTR	MTR	-0.2	-2.84	0	0.02
NAB1	NAB1	0.18	2.73	0	0.02
NPSR1	NPSR1	0.19	2.76	0	0.02
NR0B1	NR0B1	-0.19	-2.82	0	0.02
NR5A1	NR5A1	-0.19	-2.79	0	0.02
NRBF2	NRBF2	-0.18	-2.78	0.01	0.02
NUP133	NUP133	-0.17	-2.73	0	0.02
OAZ2	OAZ2	-0.17	-2.76	0	0.02
OGG1	OGG1	-0.17	-2.78	0.01	0.02
OPN3	OPN3	0.19	2.75	0	0.02
OPRL1	OPRL1	-0.2	-2.85	0	0.02
OXER1	OXER1	0.18	2.77	0	0.02
OXGR1	OXGR1	-0.19	-2.79	0	0.02
PAK1	PAK1	0.17	2.72	0.01	0.02
PBK	PBK	0.18	2.7	0	0.02
PBXIP1	PBXIP1	-0.18	-2.72	0	0.02
PCGF6	PCGF6	-0.18	-2.84	0	0.02
PGM1	PGM1	-0.18	-2.81	0.01	0.02
PHLPP1	PHLPP1	0.18	2.69	0.01	0.02
PJA1	PJA1	0.18	2.76	0	0.02
PPP4C	PPP4C	0.17	2.73	0.01	0.02
PSMD8	PSMD8	-0.17	-2.76	0.01	0.02
PTGDR2	PTGDR2	-0.18	-2.82	0	0.02
PTS	PTS	0.18	2.79	0	0.02
RAN	RAN	0.18	2.75	0.01	0.02
RFK	RFK	0.18	2.76	0	0.02
RGS18	RGS18	0.19	2.73	0	0.02
RGS2	RGS2	0.19	2.77	0	0.02
RIPK4	RIPK4	-0.18	-2.74	0.01	0.02
RPA3	RPA3	-0.17	-2.75	0.01	0.02
RPL7	RPL7	-0.18	-2.78	0.01	0.02
S100B	S100B	0.17	2.75	0.01	0.02
SFN	SFN	0.18	2.69	0	0.02
SGPL1	SGPL1	0.18	2.79	0	0.02
SLC25A4	SLC25A4	0.18	2.76	0.01	0.02
SLC8A1	SLC8A1	0.17	2.71	0.01	0.02
SMARCC1	SMARCC1	0.2	2.78	0	0.02
SOX4	SOX4	0.19	2.77	0	0.02
SPDEF	SPDEF	0.19	2.78	0	0.02
STUB1	STUB1	-0.19	-2.77	0	0.02
ADAT1	ADAT1	-0.18	-2.7	0.01	0.03
ADRA2B	ADRA2B	0.17	2.61	0.01	0.03
ASPH	ASPH	0.17	2.63	0.01	0.03
ATIC	ATIC	0.18	2.63	0.01	0.03
AXL	AXL	-0.16	-2.67	0.01	0.03
BAZ2B	BAZ2B	-0.17	-2.7	0	0.03
BUB3	BUB3	0.18	2.66	0	0.03
BZW2	BZW2	-0.17	-2.66	0.01	0.03
CASK	CASK	0.17	2.62	0.01	0.03
CASP7	CASP7	0.17	2.65	0	0.03
CCR8	CCR8	0.17	2.66	0.01	0.03
CDK19	CDK19	0.17	2.58	0	0.03
CENPE	CENPE	0.17	2.65	0	0.03
CNOT8	CNOT8	0.18	2.64	0.01	0.03
COMT	COMT	0.16	2.61	0.02	0.03
CRTAP	CRTAP	-0.17	-2.68	0.01	0.03
CXCR7	CXCR7	0.18	2.65	0.01	0.03
DDIT3	DDIT3	0.17	2.63	0	0.03
DHRS7	DHRS7	0.18	2.57	0	0.03
DNTTIP2	DNTTIP2	-0.19	-2.7	0	0.03
DR1	DR1	-0.18	-2.67	0.01	0.03
EIF2B3	EIF2B3	0.16	2.6	0.01	0.03
FBXO5	FBXO5	0.17	2.63	0	0.03
FEN1	FEN1	0.17	2.62	0.01	0.03
FUT1	FUT1	-0.17	-2.65	0.01	0.03
FZD7	FZD7	0.18	2.64	0	0.03
GCDH	GCDH	0.17	2.65	0.01	0.03
GFOD1	GFOD1	0.18	2.6	0	0.03
GHR	GHR	0.18	2.6	0.01	0.03
GIT1	GIT1	-0.18	-2.65	0	0.03
GLI1	GLI1	0.18	2.66	0	0.03
GPR119	GPR119	0.17	2.64	0.01	0.03
GPSM1	GPSM1	0.17	2.64	0.01	0.03
HMGCS2	HMGCS2	-0.17	-2.65	0.01	0.03
HNMT	HNMT	0.17	2.58	0.01	0.03
HTR5A	HTR5A	-0.17	-2.67	0.01	0.03
JAZF1	JAZF1	0.17	2.63	0.01	0.03
KCNK2	KCNK2	0.17	2.66	0	0.03
KYNU	KYNU	0.17	2.6	0.02	0.03
LCMT1	LCMT1	0.17	2.66	0	0.03
LPHN2	LPHN2	-0.18	-2.65	0.01	0.03
MAN2B1	MAN2B1	-0.17	-2.7	0	0.03
MAPK11	MAPK11	0.16	2.6	0.02	0.03
MCM4	MCM4	0.16	2.63	0.01	0.03
MITF	MITF	-0.17	-2.66	0.01	0.03
MKX	MKX	0.17	2.66	0.01	0.03
MORF4L1	MORF4L1	0.17	2.61	0.01	0.03
MSH2	MSH2	0.17	2.63	0.01	0.03
MSH5	MSH5	0.17	2.62	0.01	0.03
MSH6	MSH6	0.15	2.64	0.02	0.03
MSX1	MSX1	-0.16	-2.71	0.02	0.03
NBR1	NBR1	0.17	2.62	0	0.03
NCOR2	NCOR2	0.17	2.65	0	0.03
NDUFB1	NDUFB1	-0.17	-2.69	0.01	0.03
NPBWR1	NPBWR1	0.17	2.63	0.01	0.03
NUMA1	NUMA1	-0.17	-2.67	0	0.03
PCK2	PCK2	-0.17	-2.66	0.01	0.03
PCMT1	PCMT1	0.17	2.58	0.02	0.03
PDE5A	PDE5A	0.17	2.58	0.01	0.03
PIAS4	PIAS4	-0.18	-2.7	0	0.03
PKD2	PKD2	0.18	2.62	0.01	0.03
PLCB3	PLCB3	0.17	2.63	0	0.03
PMAIP1	PMAIP1	0.18	2.66	0	0.03
POU2AF1	POU2AF1	0.17	2.66	0.01	0.03
PRKCG	PRKCG	-0.18	-2.65	0	0.03
PRKRA	PRKRA	0.17	2.6	0.01	0.03
PRLR	PRLR	-0.18	-2.7	0.01	0.03
PRPF6	PRPF6	0.17	2.61	0	0.03
PRSS23	PRSS23	-0.17	-2.72	0	0.03
RBBP8	RBBP8	0.18	2.65	0	0.03
RFWD2	RFWD2	-0.17	-2.69	0.01	0.03
RPF1	RPF1	0.18	2.63	0	0.03
RPS6KB1	RPS6KB1	-0.17	-2.66	0.01	0.03
SCRN1	SCRN1	0.17	2.59	0.01	0.03
SERPINH1	SERPINH1	-0.17	-2.68	0	0.03
SLC22A4	SLC22A4	0.17	2.6	0.01	0.03
SLC25A6	SLC25A6	0.16	2.58	0.02	0.03
SMURF2	SMURF2	0.17	2.59	0.01	0.03
SNAI3	SNAI3	-0.17	-2.71	0	0.03
SPAG7	SPAG7	0.17	2.59	0.01	0.03
SSB	SSB	0.17	2.59	0.01	0.03
STAM2	STAM2	0.18	2.63	0	0.03
ABCC5	ABCC5	-0.18	-2.63	0.01	0.04
AFG3L2	AFG3L2	0.16	2.51	0.01	0.04
AHCY	AHCY	0.17	2.54	0.02	0.04
AKAP17A	AKAP17A	-0.19	-2.62	0	0.04
ALDH3B2	ALDH3B2	0.16	2.55	0.01	0.04
ATP6V0C	ATP6V0C	0.17	2.56	0	0.04
C2	C2	-0.17	-2.59	0.01	0.04
C5	C5	-0.17	-2.63	0	0.04
CCNC	CCNC	0.17	2.56	0.01	0.04
CEP57	CEP57	-0.17	-2.61	0.02	0.04
CFD	CFD	-0.15	-2.6	0.02	0.04
CHRNA4	CHRNA4	0.17	2.52	0.01	0.04
CP	CP	0.17	2.56	0.01	0.04
CSNK1A1	CSNK1A1	0.17	2.55	0.01	0.04
CYP17A1	CYP17A1	-0.17	-2.59	0.01	0.04
EAPP	EAPP	-0.16	-2.62	0.02	0.04
EGR3	EGR3	0.17	2.53	0	0.04
FCGR2A	FCGR2A	0.17	2.54	0.01	0.04
GABRP	GABRP	0.17	2.52	0.01	0.04
GLRX2	GLRX2	-0.16	-2.59	0.01	0.04
GPER	GPER	-0.17	-2.62	0.01	0.04
GPR26	GPR26	-0.17	-2.6	0.01	0.04
GUCY1B3	GUCY1B3	-0.17	-2.58	0.01	0.04
HGS	HGS	0.16	2.56	0.01	0.04
HMGB1	HMGB1	0.17	2.51	0	0.04
HMMR	HMMR	0.16	2.55	0.01	0.04
IKZF5	IKZF5	0.16	2.54	0.02	0.04
IL1R2	IL1R2	-0.17	-2.62	0.01	0.04
ITCH	ITCH	-0.17	-2.6	0.02	0.04
ITGAV	ITGAV	0.16	2.52	0.02	0.04
KIF5C	KIF5C	0.18	2.55	0.01	0.04
LHX2	LHX2	-0.16	-2.61	0.02	0.04
LSM5	LSM5	0.16	2.57	0.01	0.04
MAP3K8	MAP3K8	-0.17	-2.6	0.01	0.04
MCHR2	MCHR2	-0.18	-2.57	0.01	0.04
MED1	MED1	-0.18	-2.6	0	0.04
MRGPRX4	MRGPRX4	-0.17	-2.59	0.01	0.04
MSRA	MSRA	0.17	2.54	0.01	0.04
MXD4	MXD4	-0.18	-2.6	0	0.04
NDUFA6	NDUFA6	0.16	2.55	0.01	0.04
NDUFAB1	NDUFAB1	-0.17	-2.6	0.01	0.04
NEK7	NEK7	0.16	2.54	0.01	0.04
OTX1	OTX1	-0.18	-2.57	0.01	0.04
PCCB	PCCB	0.16	2.51	0.01	0.04
PCSK9	PCSK9	-0.15	-2.58	0.01	0.04
PGR	PGR	0.17	2.51	0.01	0.04
PPP2CA	PPP2CA	0.17	2.52	0.02	0.04
PUM2	PUM2	0.17	2.56	0.01	0.04
PWP1	PWP1	-0.17	-2.58	0	0.04
RASA1	RASA1	0.16	2.53	0.01	0.04
RASGRP4	RASGRP4	-0.17	-2.57	0.01	0.04
RBBP6	RBBP6	0.17	2.55	0.01	0.04
RND3	RND3	0.16	2.51	0.01	0.04
RPL39L	RPL39L	0.18	2.55	0.01	0.04
SLC25A10	SLC25A10	-0.17	-2.58	0.01	0.04
SPR	SPR	-0.16	-2.57	0.01	0.04
SPTLC3	SPTLC3	0.17	2.51	0.01	0.04
ST13	ST13	-0.18	-2.63	0.01	0.04
STXBP2	STXBP2	-0.18	-2.61	0	0.04
ACHE	ACHE	0.17	2.5	0.01	0.05
AGTR2	AGTR2	0.15	2.49	0.02	0.05
ARL3	ARL3	0.16	2.48	0.01	0.05
AURKA	AURKA	-0.17	-2.53	0.01	0.05
BCAR1	BCAR1	0.16	2.46	0.03	0.05
BCR	BCR	-0.16	-2.55	0.02	0.05
BOLA1	BOLA1	0.16	2.45	0.02	0.05
C2CD2L	C2CD2L	0.16	2.46	0.02	0.05
CASP3	CASP3	0.16	2.48	0.01	0.05
CELSR2	CELSR2	0.17	2.48	0.02	0.05
DAG1	DAG1	-0.17	-2.56	0.01	0.05
DNMT3B	DNMT3B	0.16	2.47	0.01	0.05
DUSP9	DUSP9	0.16	2.46	0.02	0.05
EIF2S1	EIF2S1	-0.16	-2.51	0.01	0.05
EIF4EBP1	EIF4EBP1	-0.17	-2.53	0.01	0.05
EML3	EML3	-0.16	-2.53	0.02	0.05
FOS	FOS	0.16	2.5	0.02	0.05
GLIS3	GLIS3	-0.18	-2.53	0.01	0.05
GSR	GSR	0.16	2.46	0.02	0.05
HMGN5	HMGN5	-0.16	-2.52	0.01	0.05
IDH3B	IDH3B	0.16	2.47	0.02	0.05
ITGB5	ITGB5	-0.16	-2.52	0.02	0.05
ITPK1	ITPK1	-0.17	-2.54	0.01	0.05
KCNA2	KCNA2	-0.17	-2.56	0	0.05
KCNA7	KCNA7	-0.16	-2.56	0.01	0.05
LRRC32	LRRC32	-0.17	-2.56	0.01	0.05
MCM7	MCM7	0.16	2.49	0.02	0.05
MDH1	MDH1	-0.17	-2.53	0.01	0.05
MMP25	MMP25	0.17	2.49	0	0.05
MSL3	MSL3	0.16	2.48	0.01	0.05
MTSS1	MTSS1	-0.16	-2.52	0.01	0.05
NEK9	NEK9	0.16	2.48	0.02	0.05
NNT	NNT	-0.17	-2.55	0.01	0.05
NR1H3	NR1H3	0.16	2.46	0.02	0.05
NRIP3	NRIP3	0.17	2.49	0.01	0.05
PCDH15	PCDH15	0.16	2.49	0.03	0.05
PHF10	PHF10	-0.17	-2.53	0	0.05
PHRF1	PHRF1	0.15	2.5	0.01	0.05
PIH1D1	PIH1D1	0.16	2.5	0.01	0.05
PITPNA	PITPNA	-0.17	-2.54	0	0.05
PMPCB	PMPCB	0.16	2.47	0.01	0.05
PPARA	PPARA	-0.17	-2.54	0.01	0.05
RAD51C	RAD51C	0.16	2.47	0.02	0.05
RBBP7	RBBP7	-0.18	-2.53	0	0.05
RPS13	RPS13	0.17	2.47	0.01	0.05
SCNN1A	SCNN1A	0.15	2.5	0.02	0.05
SKP2	SKP2	0.17	2.46	0.01	0.05
SLC25A1	SLC25A1	0.16	2.5	0.01	0.05
SMARCA4	SMARCA4	-0.17	-2.52	0.01	0.05

## Sheet: Sheet2
	description	log2FoldChange_CS	log2FoldChange_NCS	log2FoldChange_Pvalue	log2FoldChange_FDR
AATF	AATF	0.21	3.21	0	0
ACACA	ACACA	0.24	3.76	0	0
ACACB	ACACB	0.19	3.07	0	0
ACE	ACE	-0.21	-3.24	0	0
ACVR1	ACVR1	0.2	3.14	0	0
ADC	ADC	0.23	3.42	0	0
ADCK4	ADCK4	-0.2	-3.29	0	0
ADH6	ADH6	-0.26	-3.82	0	0
ADK	ADK	0.24	3.74	0	0
ADO	ADO	0.32	4.51	0	0
ADORA3	ADORA3	0.21	3.13	0	0
ADRA2A	ADRA2A	0.19	3.08	0	0
AGT	AGT	0.26	3.9	0	0
AIFM1	AIFM1	-0.21	-3.32	0	0
AKAP8L	AKAP8L	0.23	3.43	0	0
AKR1A1	AKR1A1	-0.24	-3.71	0	0
AKT1	AKT1	0.23	3.32	0	0
AKT2	AKT2	0.22	3.32	0	0
ALDH2	ALDH2	-0.23	-3.66	0	0
ALG5	ALG5	0.25	3.72	0	0
ANO10	ANO10	0.25	3.7	0	0
AP2A2	AP2A2	0.22	3.34	0	0
ARF4	ARF4	-0.25	-3.89	0	0
ARHGAP35	ARHGAP35	0.21	3.14	0	0
ARHGDIB	ARHGDIB	-0.22	-3.51	0	0
ARNT	ARNT	0.21	3.2	0	0
ARNT2	ARNT2	0.25	3.72	0	0
ARNTL	ARNTL	0.26	3.87	0	0
ARPC1A	ARPC1A	0.19	3.08	0	0
ASF1A	ASF1A	0.22	3.45	0	0
ASF1B	ASF1B	-0.22	-3.58	0	0
ASGR2	ASGR2	0.25	3.84	0	0
ATG3	ATG3	0.22	3.32	0	0
ATG5	ATG5	-0.19	-3.19	0	0
ATG7	ATG7	0.21	3.08	0	0
ATOX1	ATOX1	0.25	3.82	0	0
ATP2A2	ATP2A2	0.27	4.05	0	0
ATP2B1	ATP2B1	0.22	3.37	0	0
ATP2C1	ATP2C1	0.21	3.32	0	0
ATP5D	ATP5D	0.19	3.06	0	0
AXIN2	AXIN2	0.21	3.23	0	0
B3GNT1	B3GNT1	0.24	3.57	0	0
B4GALT1	B4GALT1	0.2	3.12	0	0
B4GALT4	B4GALT4	0.2	3.06	0	0
BCKDHA	BCKDHA	0.19	3.06	0	0
BCL7B	BCL7B	0.28	4.41	0	0
BDKRB2	BDKRB2	0.2	3.18	0	0
BID	BID	0.2	3.11	0	0
BIRC5	BIRC5	0.2	3.1	0	0
BIRC6	BIRC6	0.22	3.61	0	0
BLVRA	BLVRA	0.23	3.52	0	0
BMP2	BMP2	0.22	3.66	0	0
BMPR1A	BMPR1A	0.22	3.36	0	0
BNIP3	BNIP3	0.22	3.4	0	0
BRCA1	BRCA1	-0.22	-3.27	0	0
BRPF3	BRPF3	0.3	4.65	0	0
CACNA1G	CACNA1G	0.2	3.17	0	0
CACNA2D3	CACNA2D3	-0.2	-3.3	0	0
CALML6	CALML6	-0.25	-3.74	0	0
CALR	CALR	0.21	3.22	0	0
CALU	CALU	-0.22	-3.46	0	0
CALY	CALY	-0.22	-3.41	0	0
CAMKK2	CAMKK2	0.21	3.21	0	0
CASP14	CASP14	0.21	3.11	0	0
CASP8	CASP8	0.22	3.29	0	0
CATSPER1	CATSPER1	0.26	4.11	0	0
CATSPER2	CATSPER2	0.26	4	0	0
CATSPER3	CATSPER3	0.26	4.11	0	0
CATSPER4	CATSPER4	0.26	4.16	0	0
CBS	CBS	-0.22	-3.18	0	0
CCKAR	CCKAR	-0.23	-3.55	0	0
CCNL1	CCNL1	-0.23	-3.6	0	0
CD83	CD83	0.26	4.08	0	0
CDC25A	CDC25A	0.2	3.17	0	0
CDC42	CDC42	-0.2	-3.42	0	0
CDIPT	CDIPT	-0.2	-3.26	0	0
CDK2	CDK2	0.25	3.73	0	0
CDK4	CDK4	0.21	3.13	0	0
CDK5	CDK5	0.22	3.37	0	0
CDK6	CDK6	0.22	3.5	0	0
CDK8	CDK8	0.22	3.36	0	0
CDK9	CDK9	0.19	3.08	0	0
CDKAL1	CDKAL1	-0.22	-3.56	0	0
CEBPA	CEBPA	0.25	3.64	0	0
CFLAR	CFLAR	0.21	3.19	0	0
CHAC1	CHAC1	0.21	3.51	0	0
CHEK2	CHEK2	0.22	3.38	0	0
CHIC2	CHIC2	0.23	3.49	0	0
CHMP2A	CHMP2A	0.2	3.11	0	0
CHRM3	CHRM3	0.22	3.24	0	0
CHRM5	CHRM5	0.21	3.17	0	0
CHRNB1	CHRNB1	0.22	3.37	0	0
CHRNB2	CHRNB2	0.18	3.08	0.01	0
CHRND	CHRND	0.22	3.39	0	0
CHRNE	CHRNE	0.22	3.4	0	0
CHRNG	CHRNG	0.22	3.29	0	0
CKS1B	CKS1B	-0.27	-3.92	0	0
CLK1	CLK1	-0.22	-3.46	0	0
CLK3	CLK3	0.27	4.18	0	0
CLPP	CLPP	0.21	3.27	0	0
CNOT4	CNOT4	0.2	3.22	0	0
COL13A1	COL13A1	0.22	3.18	0	0
CREG1	CREG1	0.26	3.95	0	0
CRY1	CRY1	-0.26	-3.84	0	0
CSAD	CSAD	0.3	4.58	0	0
CSF2RB	CSF2RB	0.2	3.07	0	0
CSNK1E	CSNK1E	0.22	3.43	0	0
CSNK1G2	CSNK1G2	0.26	3.76	0	0
CTNNB1	CTNNB1	-0.28	-4.29	0	0
CTSH	CTSH	0.2	3.19	0	0
CXCL2	CXCL2	0.24	3.54	0	0
CYCS	CYCS	0.28	4.28	0	0
CYP11B2	CYP11B2	0.22	3.38	0	0
CYP3A7	CYP3A7	0.22	3.39	0	0
DAGLA	DAGLA	0.26	4.06	0	0
DAGLB	DAGLB	0.26	4.08	0	0
DCK	DCK	0.28	4.49	0	0
DDB2	DDB2	-0.24	-3.55	0	0
DGCR14	DGCR14	-0.21	-3.3	0	0
DGKD	DGKD	-0.22	-3.72	0	0
DHCR7	DHCR7	0.24	3.55	0	0
DHRS2	DHRS2	0.25	3.74	0	0
DHX16	DHX16	0.24	3.58	0	0
DIDO1	DIDO1	0.28	4.47	0	0
DKC1	DKC1	-0.29	-4.64	0	0
DLGAP5	DLGAP5	0.21	3.3	0	0
DNA2	DNA2	-0.26	-4.12	0	0
DNAJC1	DNAJC1	0.23	3.51	0	0
DRD4	DRD4	0.2	3.22	0	0
DTNA	DTNA	0.24	3.57	0	0
DVL2	DVL2	0.21	3.55	0	0
DYNLL2	DYNLL2	0.22	3.37	0	0
DYRK3	DYRK3	0.25	3.69	0	0
EBP	EBP	0.21	3.18	0	0
ECSIT	ECSIT	0.2	3.32	0	0
EGF	EGF	0.21	3.4	0	0
EGFR	EGFR	0.22	3.27	0	0
EHHADH	EHHADH	-0.23	-3.71	0	0
EIF3H	EIF3H	0.19	3.16	0	0
EIF4G1	EIF4G1	-0.22	-3.33	0	0
ELF1	ELF1	-0.22	-3.51	0	0
ELK1	ELK1	-0.27	-4.02	0	0
EMD	EMD	-0.2	-3.25	0	0
ENOSF1	ENOSF1	0.25	3.96	0	0
ENTPD2	ENTPD2	0.2	3.19	0	0
ENTPD6	ENTPD6	0.2	3.13	0	0
EPAS1	EPAS1	0.23	3.28	0	0
EPC1	EPC1	0.22	3.27	0	0
EPN2	EPN2	0.26	3.99	0	0
EPO	EPO	0.2	3.1	0	0
ERCC6L	ERCC6L	0.27	3.75	0	0
ERG	ERG	0.22	3.46	0	0
ERH	ERH	0.2	3.21	0	0
ESRRB	ESRRB	0.21	3.3	0	0
ETV4	ETV4	-0.21	-3.2	0	0
F2RL1	F2RL1	-0.22	-3.42	0	0
F9	F9	0.24	3.52	0	0
FADS3	FADS3	-0.22	-3.44	0	0
FAS	FAS	0.28	4.29	0	0
FBXO7	FBXO7	0.23	3.55	0	0
FDPS	FDPS	0.24	3.98	0	0
FGA	FGA	0.23	3.5	0	0
FGFR3	FGFR3	-0.21	-3.3	0	0
FOLR1	FOLR1	0.2	3.3	0	0
FOXR1	FOXR1	0.24	3.53	0	0
FPR1	FPR1	0.21	3.19	0.01	0
FRAT1	FRAT1	0.21	3.36	0	0
FTL	FTL	0.2	3.07	0	0
GAA	GAA	0.21	3.16	0	0
GALNS	GALNS	-0.27	-4.06	0	0
GAMT	GAMT	-0.21	-3.19	0	0
GAS6	GAS6	-0.21	-3.34	0	0
GATA3	GATA3	0.22	3.17	0	0
GATAD1	GATAD1	0.22	3.41	0	0
GCA	GCA	0.24	3.83	0	0
GCH1	GCH1	0.23	3.47	0	0
GDI1	GDI1	-0.23	-3.41	0	0
GDPD5	GDPD5	-0.23	-3.65	0	0
GGCX	GGCX	0.2	3.13	0	0
GGH	GGH	0.2	3.19	0	0
GLRA2	GLRA2	0.26	4.24	0	0
GLRA3	GLRA3	0.26	4.01	0	0
GMPS	GMPS	0.27	3.85	0	0
GNE	GNE	0.25	3.61	0	0
GPC1	GPC1	0.22	3.55	0	0
GPI	GPI	0.25	3.83	0	0
GPR123	GPR123	-0.24	-3.4	0	0
GPR141	GPR141	0.2	3.19	0	0
GPR152	GPR152	0.24	3.81	0	0
GPR153	GPR153	0.26	3.92	0	0
GPR83	GPR83	-0.22	-3.32	0	0
GPRC6A	GPRC6A	0.22	3.41	0	0
GPX1	GPX1	-0.23	-3.63	0	0
GPX2	GPX2	0.23	3.46	0	0
GRK5	GRK5	0.22	3.43	0	0
GRM2	GRM2	-0.21	-3.19	0	0
GRM3	GRM3	-0.22	-3.44	0	0
GSDMB	GSDMB	-0.27	-4	0	0
GUK1	GUK1	-0.23	-3.5	0	0
GYG1	GYG1	-0.26	-3.86	0	0
HAL	HAL	0.22	3.4	0	0
HCAR2	HCAR2	-0.21	-3.21	0	0
HCRTR2	HCRTR2	0.19	3.11	0	0
HK1	HK1	-0.24	-3.66	0	0
HLA-DMA	HLA-DMA	0.3	4.56	0	0
HLA-DQA1	HLA-DQA1	0.24	3.61	0	0
HLA-DRB3	HLA-DRB3	0.2	3.12	0	0
HMGCS1	HMGCS1	0.22	3.25	0	0
HNF1B	HNF1B	0.21	3.2	0	0
HORMAD2	HORMAD2	-0.23	-3.69	0	0
HOXA1	HOXA1	0.27	4.13	0	0
HOXA9	HOXA9	0.21	3.23	0	0
HOXB4	HOXB4	-0.25	-4.05	0	0
HPD	HPD	0.25	3.79	0	0
HRH3	HRH3	-0.22	-3.31	0	0
HS2ST1	HS2ST1	0.26	3.9	0	0
HSPA2	HSPA2	-0.25	-3.88	0	0
HSPA9	HSPA9	0.28	4.37	0	0
HTATIP2	HTATIP2	0.21	3.33	0	0
HTATSF1	HTATSF1	-0.22	-3.59	0	0
HYOU1	HYOU1	0.29	4.23	0	0
IARS2	IARS2	0.21	3.49	0	0
ICAM1	ICAM1	0.25	3.87	0	0
ID1	ID1	0.19	3.24	0	0
IDE	IDE	0.2	3.17	0	0
IGBP1	IGBP1	-0.29	-4.31	0	0
IGF1	IGF1	0.2	3.12	0	0
IGFBP5	IGFBP5	0.21	3.1	0	0
IGFBP7	IGFBP7	-0.23	-3.41	0	0
IKBKB	IKBKB	0.27	4.18	0	0
IL15	IL15	0.25	3.73	0	0
IL1R1	IL1R1	0.2	3.08	0	0
IL6ST	IL6ST	0.2	3.23	0	0
ILK	ILK	0.22	3.41	0	0
ING3	ING3	0.23	3.54	0	0
INPP5D	INPP5D	0.24	3.76	0	0
IRS1	IRS1	0.29	4.38	0	0
ISX	ISX	0.21	3.53	0	0
ITGA2	ITGA2	0.22	3.43	0	0
KCND2	KCND2	-0.25	-3.73	0	0
KCNJ10	KCNJ10	0.21	3.42	0	0
KCNJ12	KCNJ12	-0.22	-3.49	0	0
KCNK1	KCNK1	0.21	3.36	0	0
KCNQ2	KCNQ2	0.23	3.49	0	0
KCNQ4	KCNQ4	0.23	3.51	0	0
KDM5A	KDM5A	-0.21	-3.31	0	0
KIAA0196	KIAA0196	0.23	3.6	0	0
KIAA0317	KIAA0317	-0.21	-3.24	0	0
KIF11	KIF11	0.26	3.82	0	0
KLK6	KLK6	-0.25	-3.73	0	0
KNG1	KNG1	-0.24	-3.62	0	0
KREMEN1	KREMEN1	0.23	3.32	0	0
KRT25	KRT25	0.26	4.1	0	0
LAMB1	LAMB1	0.22	3.55	0	0
LIAS	LIAS	0.26	3.87	0	0
LIPH	LIPH	0.24	3.78	0	0
LMNA	LMNA	-0.24	-3.87	0	0
LPAR5	LPAR5	0.24	3.66	0	0
LRRC18	LRRC18	-0.22	-3.33	0	0
LRRK2	LRRK2	0.21	3.19	0	0
LRSAM1	LRSAM1	0.29	4.48	0	0
LTA4H	LTA4H	-0.21	-3.24	0	0
LTBR	LTBR	0.22	3.4	0	0
MACF1	MACF1	0.21	3.22	0	0
MAD2L1BP	MAD2L1BP	0.2	3.22	0	0
MAP3K14	MAP3K14	0.22	3.28	0	0
MAP3K2	MAP3K2	-0.21	-3.26	0	0
MAP7	MAP7	0.28	4.23	0	0
MAPK10	MAPK10	0.21	3.26	0	0
MAPK12	MAPK12	0.23	3.65	0	0
MAPK8IP1	MAPK8IP1	0.22	3.55	0	0
MAPKAPK5	MAPKAPK5	0.28	3.83	0	0
MBNL1	MBNL1	0.22	3.33	0	0
MCL1	MCL1	0.2	3.41	0	0
MCM5	MCM5	-0.2	-3.23	0	0
MCOLN1	MCOLN1	-0.24	-3.62	0	0
MED12L	MED12L	0.22	3.63	0	0
MED21	MED21	0.21	3.28	0	0
MED28	MED28	0.21	3.08	0	0
MED7	MED7	-0.23	-3.33	0	0
MEN1	MEN1	0.22	3.7	0	0
MFHAS1	MFHAS1	0.22	3.25	0	0
MGAT1	MGAT1	0.23	3.71	0	0
MGST2	MGST2	0.2	3.11	0	0
MMP14	MMP14	0.2	3.1	0	0
MMP7	MMP7	-0.25	-3.76	0	0
MNAT1	MNAT1	0.21	3.15	0	0
MTA3	MTA3	-0.24	-3.6	0	0
MTERFD1	MTERFD1	0.21	3.37	0	0
MTNR1A	MTNR1A	-0.2	-3.37	0	0
MXD3	MXD3	-0.21	-3.38	0	0
MYBL2	MYBL2	0.22	3.22	0	0
MYCN	MYCN	0.2	3.29	0	0
MYD88	MYD88	0.21	3.41	0	0
MYLK	MYLK	0.19	3.27	0	0
MYNN	MYNN	-0.21	-3.37	0	0
NAB2	NAB2	0.29	4.71	0	0
NARFL	NARFL	0.22	3.34	0	0
NARS	NARS	0.21	3.27	0	0
NAT1	NAT1	-0.28	-4.27	0	0
NCOA2	NCOA2	0.26	3.92	0	0
NDUFA5	NDUFA5	0.24	3.68	0	0
NDUFA9	NDUFA9	-0.25	-3.79	0	0
NEK6	NEK6	-0.23	-3.56	0	0
NET1	NET1	0.26	3.92	0	0
NFKB1	NFKB1	0.25	3.98	0	0
NFKBIB	NFKBIB	0.2	3.19	0	0
NFYB	NFYB	0.22	3.5	0	0
NKX2-3	NKX2-3	0.21	3.17	0	0
NME9	NME9	0.3	4.56	0	0
NMI	NMI	-0.22	-3.31	0	0
NOL3	NOL3	0.23	3.31	0	0
NOSIP	NOSIP	0.22	3.48	0	0
NOX1	NOX1	0.2	3.23	0	0
NPC1L1	NPC1L1	0.29	4.47	0	0
NPEPL1	NPEPL1	0.22	3.31	0	0
NPY1R	NPY1R	0.21	3.48	0	0
NQO1	NQO1	0.2	3.06	0	0
NR1H4	NR1H4	0.21	3.36	0	0
NR2C2	NR2C2	-0.21	-3.24	0	0
NR5A2	NR5A2	0.22	3.74	0	0
NRBP1	NRBP1	0.22	3.49	0	0
NT5C2	NT5C2	0.23	3.39	0	0
O3FAR1	O3FAR1	-0.24	-3.7	0	0
OAZ1	OAZ1	0.25	3.7	0	0
OPA1	OPA1	0.22	3.37	0	0
OR5W2	OR5W2	0.25	3.75	0	0
ORC1	ORC1	-0.23	-3.65	0	0
OVOL2	OVOL2	0.2	3.07	0	0
P4HTM	P4HTM	0.24	3.87	0	0
PC	PC	0.2	3.06	0	0
PCGF3	PCGF3	-0.25	-3.68	0	0
PCSK7	PCSK7	-0.26	-4.15	0	0
PDPK1	PDPK1	0.21	3.31	0	0
PGRMC1	PGRMC1	-0.21	-3.27	0	0
PHF16	PHF16	-0.21	-3.36	0	0
PHYH	PHYH	0.24	3.53	0	0
PI4KAP2	PI4KAP2	0.22	3.3	0	0
PIAS1	PIAS1	-0.29	-4.38	0	0
PIAS3	PIAS3	-0.21	-3.4	0	0
PIK3R4	PIK3R4	0.21	3.11	0	0
PIM1	PIM1	0.29	4.44	0	0
PIP4K2C	PIP4K2C	0.21	3.23	0	0
PJA2	PJA2	0.24	3.36	0	0
PKN2	PKN2	0.22	3.49	0	0
PLA2G2D	PLA2G2D	0.23	3.48	0	0
PLA2G4A	PLA2G4A	0.32	5.22	0	0
PLCL1	PLCL1	0.23	3.29	0	0
PLXNA1	PLXNA1	0.2	3.07	0	0
PNPO	PNPO	0.24	3.78	0	0
POLD4	POLD4	0.23	3.74	0	0
POLR2A	POLR2A	0.26	3.94	0	0
POLR2C	POLR2C	-0.27	-4.27	0	0
POLRMT	POLRMT	0.2	3.21	0	0
PPIB	PPIB	-0.23	-3.68	0	0
PPP2R3A	PPP2R3A	0.25	3.99	0	0
PPT1	PPT1	0.22	3.32	0	0
PRDX1	PRDX1	-0.23	-3.45	0	0
PRDX5	PRDX5	0.2	3.21	0	0
PRKCA	PRKCA	0.23	3.64	0	0
PRKCD	PRKCD	0.24	3.59	0	0
PRKCI	PRKCI	0.23	3.43	0	0
PRKD2	PRKD2	0.21	3.29	0	0
PRMT2	PRMT2	-0.29	-4.4	0	0
PROC	PROC	0.24	3.49	0	0
PROCR	PROCR	0.24	4.07	0	0
PROKR1	PROKR1	-0.23	-3.54	0	0
PRPF4	PRPF4	0.21	3.28	0	0
PSMA3	PSMA3	0.23	3.51	0	0
PSMB7	PSMB7	0.22	3.25	0	0
PSMB8	PSMB8	-0.21	-3.23	0	0
PTGFR	PTGFR	0.24	3.69	0	0
PTRF	PTRF	0.21	3.13	0	0
PTTG1	PTTG1	0.22	3.43	0	0
PYCR1	PYCR1	0.2	3.1	0	0
QPRT	QPRT	0.21	3.1	0	0
RAC1	RAC1	0.22	3.43	0	0
RANBP9	RANBP9	0.22	3.26	0	0
RAP1A	RAP1A	0.25	3.88	0	0
RARB	RARB	-0.23	-3.32	0	0
RASSF2	RASSF2	0.25	3.94	0	0
RBCK1	RBCK1	0.23	3.61	0	0
RBMX	RBMX	0.25	3.67	0	0
RCCD1	RCCD1	-0.2	-3.2	0	0
RFC2	RFC2	0.24	3.83	0	0
RFX5	RFX5	0.22	3.38	0	0
RFXANK	RFXANK	-0.24	-3.64	0	0
RGS19	RGS19	0.21	3.27	0	0
RNASE4	RNASE4	-0.26	-3.91	0	0
RNF125	RNF125	-0.21	-3.32	0	0
RNF166	RNF166	-0.22	-3.72	0	0
RNF5	RNF5	-0.21	-3.44	0	0
ROCK2	ROCK2	0.22	3.54	0	0
ROS1	ROS1	0.23	3.41	0	0
RPS14	RPS14	0.21	3.28	0	0
RPS19	RPS19	-0.22	-3.28	0	0
RTEL1	RTEL1	-0.22	-3.28	0	0
RUVBL2	RUVBL2	0.24	3.5	0	0
S100Z	S100Z	-0.21	-3.38	0	0
SCCPDH	SCCPDH	0.28	4.25	0	0
SCN10A	SCN10A	0.2	3.06	0	0
SCN9A	SCN9A	0.21	3.24	0	0
SDHD	SDHD	0.23	3.52	0	0
SEC24D	SEC24D	0.21	3.15	0	0
SERINC3	SERINC3	0.22	3.43	0	0
SERPINB5	SERPINB5	0.21	3.15	0	0
SGK1	SGK1	-0.24	-3.59	0	0
SIAH2	SIAH2	0.23	3.52	0	0
SIRT2	SIRT2	0.21	3.23	0	0
SIRT3	SIRT3	0.22	3.29	0	0
SLC1A5	SLC1A5	-0.22	-3.3	0	0
SLC22A5	SLC22A5	-0.24	-3.52	0	0
SLC39A6	SLC39A6	-0.22	-3.4	0	0
SNF8	SNF8	0.26	4.41	0	0
SOAT1	SOAT1	0.22	3.57	0	0
SOD1	SOD1	0.28	4.47	0	0
SPAG4	SPAG4	0.2	3.12	0	0
SPHK2	SPHK2	0.22	3.08	0	0
SPIC	SPIC	0.22	3.75	0	0
SPP1	SPP1	0.25	3.84	0	0
SPTLC2	SPTLC2	0.31	4.98	0	0
SRM	SRM	0.22	3.45	0	0
SRPRB	SRPRB	0.21	3.32	0	0
SSTR1	SSTR1	0.24	3.58	0	0
SSTR2	SSTR2	0.24	3.6	0	0
SSTR3	SSTR3	0.24	3.83	0	0
SSTR4	SSTR4	0.21	3.36	0	0
SSTR5	SSTR5	0.24	3.64	0	0
ST3GAL5	ST3GAL5	0.22	3.4	0	0
ST7	ST7	0.29	4.21	0	0
STAM	STAM	0.21	3.26	0	0
STK36	STK36	-0.21	-3.23	0	0
STK38	STK38	-0.24	-3.6	0	0
STK39	STK39	0.21	3.34	0	0
STRN4	STRN4	0.24	3.78	0	0
STX4	STX4	-0.21	-3.25	0	0
SUCLA2	SUCLA2	0.2	3.21	0	0
SUCLG2	SUCLG2	0.24	3.83	0	0
ABCG2	ABCG2	-0.21	-3.05	0	0.01
ACSL3	ACSL3	0.19	2.8	0	0.01
ADCY9	ADCY9	-0.19	-2.9	0.01	0.01
ADORA1	ADORA1	0.19	2.87	0	0.01
ADRA1A	ADRA1A	0.18	2.91	0	0.01
ADRA2C	ADRA2C	0.18	2.84	0.01	0.01
AKAP11	AKAP11	0.22	3.03	0	0.01
AKT3	AKT3	0.19	3.02	0	0.01
ALDH1A2	ALDH1A2	0.19	2.91	0	0.01
ALDOC	ALDOC	-0.21	-3.15	0	0.01
ALOX12	ALOX12	-0.18	-2.89	0	0.01
AMIGO3	AMIGO3	0.18	2.81	0	0.01
ANKRD10	ANKRD10	0.19	2.89	0	0.01
ANKRD37	ANKRD37	-0.2	-2.92	0	0.01
AOX1	AOX1	0.17	2.81	0.01	0.01
ARG2	ARG2	0.2	3.06	0	0.01
ARGLU1	ARGLU1	0.18	2.8	0	0.01
ARPC3	ARPC3	0.19	2.97	0	0.01
ASMTL	ASMTL	-0.2	-3.04	0	0.01
ATP5H	ATP5H	-0.18	-2.93	0	0.01
ATP6V1D	ATP6V1D	0.18	2.94	0	0.01
AURKB	AURKB	0.19	2.99	0	0.01
BAG6	BAG6	-0.2	-3.1	0	0.01
BATF3	BATF3	-0.19	-2.97	0.01	0.01
BLOC1S1	BLOC1S1	0.19	3.03	0	0.01
BRAP	BRAP	0.2	3	0	0.01
BRCA2	BRCA2	0.19	2.82	0	0.01
BRD2	BRD2	0.19	2.85	0	0.01
BRD8	BRD8	-0.19	-3.02	0	0.01
BTK	BTK	-0.18	-2.99	0	0.01
BUB1B	BUB1B	-0.19	-2.99	0	0.01
C2CD2	C2CD2	-0.22	-3.12	0	0.01
C3	C3	-0.19	-3	0	0.01
CA6	CA6	0.2	3	0	0.01
CA7	CA7	-0.2	-3.02	0	0.01
CACNA1I	CACNA1I	0.19	2.97	0	0.01
CACNA2D1	CACNA2D1	-0.19	-2.94	0	0.01
CAMK2D	CAMK2D	0.19	3.03	0	0.01
CARS	CARS	0.19	2.83	0	0.01
CBR3	CBR3	0.19	2.81	0	0.01
CCDC86	CCDC86	-0.21	-3.06	0	0.01
CCND1	CCND1	-0.19	-2.91	0	0.01
CCNE1	CCNE1	-0.19	-3.01	0	0.01
CCNE2	CCNE2	0.19	3.03	0	0.01
CD24	CD24	-0.19	-3	0	0.01
CDC7	CDC7	0.19	2.81	0	0.01
CEP72	CEP72	0.19	2.94	0	0.01
CETN2	CETN2	0.21	3.04	0	0.01
CHKB	CHKB	0.18	2.8	0.01	0.01
CHRNA6	CHRNA6	-0.21	-3.08	0	0.01
CLASRP	CLASRP	-0.19	-3.07	0	0.01
CNNM2	CNNM2	-0.2	-2.93	0	0.01
COG4	COG4	0.19	3.03	0	0.01
CPT2	CPT2	0.19	2.99	0	0.01
CRYZ	CRYZ	0.19	2.96	0.01	0.01
CSDA	CSDA	-0.18	-2.96	0	0.01
CYB5B	CYB5B	-0.2	-3.11	0	0.01
CYC1	CYC1	-0.19	-3.06	0	0.01
CYP11A1	CYP11A1	-0.2	-3	0	0.01
CYP11B1	CYP11B1	-0.2	-2.89	0	0.01
CYP2A6	CYP2A6	0.2	2.98	0	0.01
CYP2B6	CYP2B6	0.18	2.88	0	0.01
DCTN6	DCTN6	-0.2	-3.05	0	0.01
DECR1	DECR1	-0.2	-2.94	0	0.01
DNAJB9	DNAJB9	0.2	2.9	0	0.01
DRD3	DRD3	0.19	2.98	0	0.01
DTX3L	DTX3L	-0.21	-3.11	0	0.01
DUT	DUT	0.18	2.83	0	0.01
DYNLL1	DYNLL1	0.19	2.91	0	0.01
EED	EED	-0.2	-2.94	0	0.01
EHF	EHF	-0.2	-3.13	0	0.01
EIF2AK3	EIF2AK3	0.2	3.05	0	0.01
EIF3J	EIF3J	-0.2	-3.14	0	0.01
EIF4A2	EIF4A2	0.19	2.98	0	0.01
EIF5A	EIF5A	-0.2	-3.16	0	0.01
ELK3	ELK3	-0.17	-2.86	0.01	0.01
ENTPD1	ENTPD1	0.2	2.96	0	0.01
ENTPD3	ENTPD3	0.17	2.82	0	0.01
ERCC5	ERCC5	0.19	2.94	0.01	0.01
EXOSC8	EXOSC8	0.2	3.05	0	0.01
EXT1	EXT1	-0.2	-2.89	0	0.01
EXT2	EXT2	-0.2	-2.93	0	0.01
F2R	F2R	0.2	2.95	0	0.01
FAM120A	FAM120A	0.19	3.02	0	0.01
FBXO21	FBXO21	-0.18	-3.09	0	0.01
FGFR1OP	FGFR1OP	-0.18	-2.89	0	0.01
FKBP14	FKBP14	-0.19	-2.89	0	0.01
FOXN3	FOXN3	-0.2	-3.04	0	0.01
FTSJ1	FTSJ1	-0.21	-3.13	0	0.01
FUS	FUS	-0.21	-2.91	0	0.01
FZD5	FZD5	0.2	3.02	0	0.01
G2E3	G2E3	0.19	2.96	0	0.01
GABBR1	GABBR1	-0.21	-3.09	0	0.01
GABBR2	GABBR2	0.19	2.88	0	0.01
GABRA4	GABRA4	0.19	2.83	0	0.01
GATA1	GATA1	-0.18	-2.87	0	0.01
GATA2	GATA2	-0.21	-3.1	0	0.01
GATA6	GATA6	-0.19	-2.94	0	0.01
GBF1	GBF1	0.19	2.8	0	0.01
GBGT1	GBGT1	-0.21	-3.14	0	0.01
GBP2	GBP2	-0.19	-3.01	0	0.01
GGCT	GGCT	0.19	2.91	0	0.01
GNAI2	GNAI2	0.18	2.86	0	0.01
GPR172A	GPR172A	0.2	2.88	0	0.01
GPR37	GPR37	-0.2	-3.04	0	0.01
GPX7	GPX7	0.19	3.04	0	0.01
GRIA3	GRIA3	0.19	2.95	0	0.01
GRIA4	GRIA4	0.19	2.93	0	0.01
GRPR	GRPR	-0.19	-2.94	0	0.01
GSTP1	GSTP1	-0.2	-3.03	0	0.01
GTF2F2	GTF2F2	-0.18	-2.86	0.01	0.01
GTF3C2	GTF3C2	-0.2	-3	0	0.01
HADH	HADH	0.19	2.87	0	0.01
HLA-A	HLA-A	0.19	2.86	0	0.01
HMGB3	HMGB3	0.2	3.03	0	0.01
HOXB2	HOXB2	-0.19	-3.04	0	0.01
HS3ST3A1	HS3ST3A1	0.19	2.96	0	0.01
HSD17B1	HSD17B1	-0.2	-3.04	0	0.01
HSPB8	HSPB8	0.19	2.93	0	0.01
HTR2C	HTR2C	0.19	2.85	0	0.01
HTRA1	HTRA1	-0.2	-3.11	0	0.01
IDH1	IDH1	-0.22	-3.15	0	0.01
IFNGR2	IFNGR2	-0.2	-2.94	0	0.01
IFRD2	IFRD2	-0.19	-2.9	0	0.01
IL11	IL11	0.19	2.97	0	0.01
IL12A	IL12A	0.21	3	0	0.01
IL13RA1	IL13RA1	-0.19	-2.87	0	0.01
IL20	IL20	0.18	2.85	0	0.01
IL4R	IL4R	0.2	2.97	0	0.01
IL5RA	IL5RA	0.2	2.95	0	0.01
ILF2	ILF2	-0.2	-3.11	0	0.01
IMPDH1	IMPDH1	-0.19	-2.96	0	0.01
ITK	ITK	-0.19	-2.88	0	0.01
JAK2	JAK2	-0.19	-3.04	0	0.01
KCNK9	KCNK9	-0.21	-3.08	0	0.01
KCNN2	KCNN2	0.19	2.88	0	0.01
KCNN3	KCNN3	0.19	2.84	0	0.01
KDM4B	KDM4B	-0.2	-3.13	0	0.01
KDR	KDR	0.19	2.85	0	0.01
KIAA1279	KIAA1279	-0.18	-2.86	0	0.01
KITLG	KITLG	-0.19	-3	0	0.01
KLF10	KLF10	-0.21	-3	0	0.01
KLF4	KLF4	-0.18	-2.91	0.01	0.01
KLHDC2	KLHDC2	0.2	2.96	0	0.01
KRT19	KRT19	0.2	3.02	0	0.01
KRT7	KRT7	0.2	3	0	0.01
LEPREL1	LEPREL1	-0.19	-2.97	0	0.01
LRP10	LRP10	-0.19	-2.88	0	0.01
MAP2K1	MAP2K1	-0.2	-3.16	0	0.01
MAP2K2	MAP2K2	-0.19	-2.92	0	0.01
MAP2K3	MAP2K3	0.19	2.93	0	0.01
MAP3K4	MAP3K4	0.19	2.95	0	0.01
MAP4K4	MAP4K4	0.19	3.04	0	0.01
MBNL2	MBNL2	-0.19	-2.92	0	0.01
ME1	ME1	-0.2	-3.05	0	0.01
MED15	MED15	-0.2	-3.15	0	0.01
MKI67IP	MKI67IP	0.18	2.8	0	0.01
MSMO1	MSMO1	0.18	2.9	0.01	0.01
NAGA	NAGA	-0.19	-2.92	0	0.01
NASP	NASP	-0.21	-3.06	0	0.01
NCOA4	NCOA4	0.2	3	0	0.01
NDFIP1	NDFIP1	-0.21	-3.18	0	0.01
NDUFB3	NDUFB3	0.19	2.9	0	0.01
NOD1	NOD1	-0.19	-3.01	0	0.01
NPTN	NPTN	0.2	3.04	0	0.01
NR1I3	NR1I3	-0.18	-2.86	0	0.01
NR3C1	NR3C1	0.2	3.03	0	0.01
NTRK2	NTRK2	0.19	2.99	0	0.01
NUCB2	NUCB2	0.19	2.99	0	0.01
NUP88	NUP88	-0.2	-2.89	0	0.01
NVL	NVL	0.2	2.95	0	0.01
OLIG3	OLIG3	-0.2	-3.01	0	0.01
OPRD1	OPRD1	0.2	2.88	0.01	0.01
OR52B2	OR52B2	-0.18	-2.87	0	0.01
OSR1	OSR1	-0.19	-3.16	0	0.01
OXCT1	OXCT1	0.19	2.96	0	0.01
P2RX1	P2RX1	0.19	2.86	0	0.01
PAF1	PAF1	0.2	3.04	0	0.01
PAK2	PAK2	0.17	2.84	0	0.01
PASD1	PASD1	0.19	3.05	0	0.01
PCBD1	PCBD1	0.19	2.85	0	0.01
PDE4C	PDE4C	0.19	2.87	0	0.01
PDX1	PDX1	-0.19	-2.96	0	0.01
PECR	PECR	-0.18	-3.03	0	0.01
PHF13	PHF13	-0.19	-2.89	0.01	0.01
PHF23	PHF23	0.2	3.03	0	0.01
PIK3CB	PIK3CB	-0.19	-2.86	0	0.01
PISD	PISD	-0.19	-2.97	0	0.01
PKIA	PKIA	0.18	2.83	0	0.01
PLA2G1B	PLA2G1B	0.2	2.96	0	0.01
PLA2G2A	PLA2G2A	0.19	2.88	0	0.01
PLD1	PLD1	0.18	2.86	0	0.01
PLP2	PLP2	0.18	2.93	0.01	0.01
PML	PML	0.17	2.82	0.01	0.01
PNKP	PNKP	0.19	2.96	0	0.01
POLR3B	POLR3B	-0.21	-3.16	0	0.01
POLR3C	POLR3C	-0.2	-3.07	0	0.01
PPIF	PPIF	0.19	2.8	0	0.01
PRDM1	PRDM1	0.2	3	0	0.01
PRR15L	PRR15L	0.2	2.97	0	0.01
PRSS3	PRSS3	-0.19	-2.95	0	0.01
PSMB10	PSMB10	-0.2	-3.17	0	0.01
PSMB5	PSMB5	-0.2	-2.96	0	0.01
PSMB9	PSMB9	0.19	3.03	0	0.01
PSMD4	PSMD4	0.18	3	0	0.01
PSMD9	PSMD9	-0.18	-2.88	0	0.01
PSPH	PSPH	0.19	2.87	0	0.01
PTMS	PTMS	0.18	2.81	0.01	0.01
PTPN12	PTPN12	0.2	2.92	0	0.01
PTPRF	PTPRF	-0.21	-3.15	0	0.01
PUS10	PUS10	0.18	2.88	0	0.01
PYCRL	PYCRL	-0.18	-2.86	0	0.01
QRSL1	QRSL1	-0.2	-3.06	0	0.01
RAF1	RAF1	0.19	3.03	0	0.01
RBKS	RBKS	0.2	2.96	0	0.01
RETSAT	RETSAT	0.18	2.93	0	0.01
RGS16	RGS16	0.18	2.8	0	0.01
RIOK2	RIOK2	-0.18	-3	0	0.01
RNF186	RNF186	0.19	2.95	0	0.01
RPS6KL1	RPS6KL1	-0.2	-3.11	0	0.01
RRM1	RRM1	-0.18	-2.89	0	0.01
RRM2	RRM2	-0.19	-2.9	0.01	0.01
RUFY1	RUFY1	0.2	2.98	0	0.01
RUNX1	RUNX1	-0.19	-2.89	0	0.01
RUVBL1	RUVBL1	-0.19	-2.87	0	0.01
S100P	S100P	-0.2	-2.93	0	0.01
SC5DL	SC5DL	-0.19	-3	0.01	0.01
SEC61A2	SEC61A2	0.2	3.04	0	0.01
SERPINA5	SERPINA5	-0.2	-3.07	0	0.01
SIRPG	SIRPG	-0.18	-2.88	0	0.01
SLC16A6	SLC16A6	-0.17	-2.86	0	0.01
SLC22A2	SLC22A2	-0.18	-2.96	0	0.01
SLC25A32	SLC25A32	-0.2	-3.13	0	0.01
SLC25A46	SLC25A46	0.19	3	0	0.01
SLC36A1	SLC36A1	0.2	2.94	0	0.01
SMARCA5	SMARCA5	-0.18	-2.92	0	0.01
SMARCB1	SMARCB1	0.19	2.9	0	0.01
SMURF1	SMURF1	0.2	3.05	0	0.01
SOX10	SOX10	0.19	2.85	0	0.01
SREBF1	SREBF1	-0.19	-2.87	0	0.01
SRGAP2	SRGAP2	-0.2	-2.98	0	0.01
STAT1	STAT1	-0.19	-2.86	0	0.01
STK33	STK33	0.19	2.9	0	0.01
SUZ12	SUZ12	-0.2	-3.06	0	0.01
