# Supplementary material for: A Natural Glucan from Black Bean Inhibits Cancer Cell Proliferation via PI3K-Akt and MAPK Pathway
Source: Molecules. 2023 Feb 19;28(4):1971. doi: 10.3390/molecules28041971 (PMC9961350; doi:10.3390/molecules28041971)
Supplement: Supplementary file 1 [file molecules-28-01971-s001.zip › Table S3.xlsx]

## Sheet: HELAHDW_VS_HELAPB_TARGET_FDR005
Table S3. Over-representation analysis of 985 potential targets for BBWPW (FDR ≤ 0.05) at the pathway level with WetGestalt
geneSet	description	link	size	overlap	expect	enrichmentRatio	pValue	FDR	overlapId	userId
hsa05200	Pathways in cancer	http://www.kegg.jp/kegg-bin/show_pathway?hsa05200+10000+10023+1017+1019+1021+1050+115+115727+1163+1439+149233+1499+163688+1643+1728+1856+1950+1956+2002+2034+2056+2064+207+208+2099+2149+2247+2261+2308+2353+2735+2771+2932+2950+2956+332+3460+3479+355+3551+3558+3566+3568+3572+3592+3593+3597+3600+3673+3685+3717+3912+405+4254+4258+4286+4436+4790+5291+5292+5331+5337+5366+5371+54205+5578+5582+5602+5604+5…	524	100	47.6364	2.09924	1.06359e-13	3.46732e-11	10000;10023;1017;1019;1021;1050;115;115727;1163;1439;149233;1499;163688;1643;1728;1856;1950;1956;2002;2034;2056;2064;207;208;2099;2149;2247;2261;2308;2353;2735;2771;2932;2950;2956;332;3460;3479;355;3551;3558;3566;3568;3572;3592;3593;3597;3600;3673;3685;3717;3912;405;4254;4258;4286;4436;4790;5291;5292;5331;5337;5366;5371;54205;5578;5582;5602;5604;5605;57121;5879;5894;5915;595;596;613;6198;624;637;…	AKT1;AKT2;ARNT;ARNT2;AXIN2;BDKRB2;BID;BIRC5;BMP2;CALML6;CASP8;CDC42;CDK2;CDK4;CDK6;CEBPA;CKS1B;CSF2RB;CTNNB1;CYCS;DDB2;DVL2;EGF;EGFR;ELK1;EPAS1;EPO;FAS;FGFR3;FRAT1;IGF1;IKBKB;IL15;IL6ST;ITGA2;LAMB1;LPAR5;MAPK10;MGST2;NFKB1;NQO1;PIM1;PRKCA;RAC1;RARB;ROCK2;ADCY9;AKT3;BRCA2;CAMK2D;CCND1;CCNE1;CCNE2;F2R;FZD5;GNAI2;GSTP1;IFNGR2;IL12A;IL13RA1;IL4R;IL5RA;JAK2;KITLG;MAP2K1;MAP2K2;NCOA4;PIK3CB;PLD1;PML;RA…
hsa04080	Neuroactive ligand-receptor interaction	http://www.kegg.jp/kegg-bin/show_pathway?hsa04080+10888+11255+1128+1131+1133+1134+1137+1140+1141+1144+1145+1146+134+140+148+150+151+152+1814+1815+186+2149+2150+2357+2550+2557+2568+2690+2742+2743+2831+2892+2893+2908+2912+2913+2925+3061+3062+3350+3358+3361+4543+4886+4985+4987+5023+5618+5646+5737+624+6751+6752+6753+6754+6755+8001+84539+886+8973+9568	277	61	25.1818	2.42238	2.59892e-11	4.23624e-09	10888;11255;1128;1131;1133;1134;1137;1140;1141;1144;1145;1146;134;140;148;150;151;152;1814;1815;186;2149;2150;2357;2550;2557;2568;2690;2742;2743;2831;2892;2893;2908;2912;2913;2925;3061;3062;3350;3358;3361;4543;4886;4985;4987;5023;5618;5646;5737;624;6751;6752;6753;6754;6755;8001;84539;886;8973;9568	ADORA3;ADRA2A;BDKRB2;CCKAR;CHRM3;CHRM5;CHRNB1;CHRNB2;CHRND;CHRNE;CHRNG;DRD4;F2RL1;FPR1;GLRA2;GLRA3;GPR83;GRM2;GRM3;HCRTR2;HRH3;MTNR1A;NPY1R;PTGFR;SSTR1;SSTR2;SSTR3;SSTR4;SSTR5;ADORA1;ADRA1A;ADRA2C;CHRNA6;DRD3;F2R;GABBR1;GABBR2;GABRA4;GRIA3;GRIA4;GRPR;HTR2C;NR3C1;OPRD1;P2RX1;PRSS3;CHRM1;CHRNA1;GLRB;HCRTR1;HTR1A;OPRL1;ADRA2B;GHR;HTR5A;NPBWR1;PRLR;CHRNA4;GABRP;MCHR2;AGTR2
hsa04010	MAPK signaling pathway.	http://www.kegg.jp/kegg-bin/show_pathway?hsa04010+10000+10746+115727+1326+1649+1845+1852+1950+1956+1969+2002+2064+207+208+2247+2261+2353+3306+3479+355+3551+3554+3791+4216+4254+4615+4790+4915+5058+5062+51295+5321+5578+55799+5582+5600+5602+5604+5605+5606+5879+5894+5906+5921+6300+673+781+783+836+8491+8550+8911+8913+9020+9448+9479+998	295	57	26.8182	2.12542	2.11815e-08	1.72629e-06	10000;10746;115727;1326;1649;1845;1852;1950;1956;1969;2002;2064;207;208;2247;2261;2353;3306;3479;355;3551;3554;3791;4216;4254;4615;4790;4915;5058;5062;51295;5321;5578;55799;5582;5600;5602;5604;5605;5606;5879;5894;5906;5921;6300;673;781;783;836;8491;8550;8911;8913;9020;9448;9479;998	AKT1;AKT2;CACNA1G;CACNA2D3;CDC42;ECSIT;EGF;EGFR;ELK1;FAS;FGFR3;HSPA2;IGF1;IKBKB;IL1R1;MAP3K14;MAP3K2;MAPK10;MAPK12;MAPK8IP1;MAPKAPK5;MYD88;NFKB1;PLA2G4A;PRKCA;RAC1;RAP1A;AKT3;CACNA1I;CACNA2D1;KDR;KITLG;MAP2K1;MAP2K2;MAP2K3;MAP3K4;MAP4K4;NTRK2;PAK2;RAF1;BRAF;CACNB2;DUSP3;EPHA2;ERBB2;FGF2;MAP4K3;PAK1;DDIT3;MAPK11;PRKCG;MAP3K8;RASA1;RASGRP4;CASP3;DUSP9;FOS
hsa04151	PI3K-Akt signaling pathway	http://www.kegg.jp/kegg-bin/show_pathway?hsa04151+10000+1017+1019+1021+1128+1950+1956+1969+1978+2056+2064+207+208+2149+2247+2261+23239+2690+2932+3479+3551+3558+3566+3667+3673+3685+3693+3717+3791+3912+4170+4254+4790+4915+5106+5170+5291+5515+5523+5578+5586+5604+5605+5618+57121+5879+5894+595+596+6198+6446+6696+672+898+9134	354	55	32.1818	1.70904	4.32381e-05	0.000343796	10000;1017;1019;1021;1128;1950;1956;1969;1978;2056;2064;207;208;2149;2247;2261;23239;2690;2932;3479;3551;3558;3566;3667;3673;3685;3693;3717;3791;3912;4170;4254;4790;4915;5106;5170;5291;5515;5523;5578;5586;5604;5605;5618;57121;5879;5894;595;596;6198;6446;6696;672;898;9134	AKT1;AKT2;BRCA1;CDK2;CDK4;CDK6;EGF;EGFR;EPO;FGFR3;IGF1;IKBKB;IRS1;ITGA2;LAMB1;LPAR5;MCL1;NFKB1;PDPK1;PKN2;PPP2R3A;PRKCA;RAC1;SGK1;SPP1;AKT3;CCND1;CCNE1;CCNE2;F2R;IL4R;JAK2;KDR;KITLG;MAP2K1;MAP2K2;NTRK2;PIK3CB;RAF1;BCL2;CHRM1;EPHA2;ERBB2;FGF2;GSK3B;IL2;PHLPP1;GHR;PCK2;PRLR;RPS6KB1;ITGAV;PPP2CA;EIF4EBP1;ITGB5
hsa05166	Human T-cell leukemia virus 1 infection	http://www.kegg.jp/kegg-bin/show_pathway?hsa05166+10000+1019+1111+11200+115+1390+1499+1856+2002+207+208+2114+2224+2353+291+293+2932+3105+3108+3117+3125+3126+3383+3551+3554+3558+3600+4055+4487+4605+4790+4801+5291+57804+5901+595+701+7850+7855+8061+811+8324+9020+9184+9232	255	45	23.1818	1.94118	8.84498e-06	0.000110902	10000;1019;1111;11200;115;1390;1499;1856;2002;207;208;2114;2224;2353;291;293;2932;3105;3108;3117;3125;3126;3383;3551;3554;3558;3600;4055;4487;4605;4790;4801;5291;57804;5901;595;701;7850;7855;8061;811;8324;9020;9184;9232	AKT1;AKT2;CALR;CDK4;CHEK2;CTNNB1;DVL2;ELK1;FDPS;HLA-DMA;HLA-DQA1;HLA-DRB3;ICAM1;IKBKB;IL15;IL1R1;LTBR;MAP3K14;MYBL2;NFKB1;NFYB;POLD4;PTTG1;ADCY9;AKT3;BUB1B;CCND1;FZD5;HLA-A;PIK3CB;CHEK1;CREM;ETS2;FOSL1;GSK3B;HLA-DRB4;IL2;RAN;SLC25A4;BUB3;FZD7;MSX1;SLC25A6;IL1R2;FOS
hsa05165	Human papillomavirus infection	http://www.kegg.jp/kegg-bin/show_pathway?hsa05165+10000+1017+1019+1021+1452+1499+1856+1950+1956+1978+207+208+2308+2932+3105+355+3551+3673+3685+3693+3912+4790+51382+527+5291+5515+5523+5584+5604+5605+5894+595+6198+6696+6772+7855+8312+8313+8324+836+841+898+9134+998	339	44	30.8182	1.42773	0.0093112	0.028106	10000;1017;1019;1021;1452;1499;1856;1950;1956;1978;207;208;2308;2932;3105;355;3551;3673;3685;3693;3912;4790;51382;527;5291;5515;5523;5584;5604;5605;5894;595;6198;6696;6772;7855;8312;8313;8324;836;841;898;9134;998	AKT1;AKT2;AXIN2;CASP8;CDC42;CDK2;CDK4;CDK6;CTNNB1;DVL2;EGF;EGFR;FAS;IKBKB;ITGA2;LAMB1;NFKB1;PPP2R3A;PRKCI;SPP1;AKT3;ATP6V1D;CCND1;CCNE1;CCNE2;FZD5;HLA-A;MAP2K1;MAP2K2;PIK3CB;RAF1;STAT1;AXIN1;FOXO1;GSK3B;FZD7;RPS6KB1;ATP6V0C;CSNK1A1;ITGAV;PPP2CA;CASP3;EIF4EBP1;ITGB5
hsa05169	Epstein-Barr virus infection	http://www.kegg.jp/kegg-bin/show_pathway?hsa05169+10000+1017+1019+1021+1643+207+208+3105+3108+3117+3125+3126+3383+355+3551+4067+4615+4790+4793+5291+54205+5600+5602+5606+5710+5714+5879+595+596+6300+637+6502+6772+695+811+836+841+898+9020+9134+953+956+9612	201	43	18.2727	2.35323	6.23163e-08	2.90216e-06	10000;1017;1019;1021;1643;207;208;3105;3108;3117;3125;3126;3383;355;3551;4067;4615;4790;4793;5291;54205;5600;5602;5606;5710;5714;5879;595;596;6300;637;6502;6772;695;811;836;841;898;9020;9134;953;956;9612	AKT1;AKT2;BID;CALR;CASP8;CDK2;CDK4;CDK6;CYCS;DDB2;FAS;HLA-DMA;HLA-DQA1;HLA-DRB3;ICAM1;IKBKB;MAP3K14;MAPK10;MAPK12;MYD88;NFKB1;NFKBIB;RAC1;AKT3;BTK;CCND1;CCNE1;CCNE2;ENTPD1;ENTPD3;HLA-A;MAP2K3;PIK3CB;PSMD4;STAT1;BCL2;HLA-DRB4;LYN;PSMD8;MAPK11;NCOR2;CASP3;SKP2
hsa05205	Proteoglycans in cancer	http://www.kegg.jp/kegg-bin/show_pathway?hsa05205+10000+10855+1499+1956+2002+2064+207+208+2099+2247+2817+3479+355+3593+3673+3685+3693+3791+5058+5170+5291+5578+5582+5600+5604+5605+5879+5894+595+6198+6300+673+7855+817+8324+836+8826+9475+998	198	39	18	2.16667	2.3675e-06	4.54003e-05	10000;10855;1499;1956;2002;2064;207;208;2099;2247;2817;3479;355;3593;3673;3685;3693;3791;5058;5170;5291;5578;5582;5600;5604;5605;5879;5894;595;6198;6300;673;7855;817;8324;836;8826;9475;998	AKT1;AKT2;CDC42;CTNNB1;EGFR;ELK1;FAS;GPC1;IGF1;ITGA2;MAPK12;PDPK1;PRKCA;RAC1;ROCK2;AKT3;CAMK2D;CCND1;FZD5;KDR;MAP2K1;MAP2K2;PIK3CB;RAF1;BRAF;ERBB2;ESR1;FGF2;HPSE;IL12B;IQGAP1;PAK1;FZD7;MAPK11;PRKCG;RPS6KB1;ITGAV;CASP3;ITGB5
hsa04024	cAMP signaling pathway	http://www.kegg.jp/kegg-bin/show_pathway?hsa04024+10000+1128+115+134+139760+163688+207+208+2149+2353+2550+2735+2771+2892+2893+3350+338442+4790+488+4886+490+5058+5143+5291+5337+5465+5602+5604+5605+5879+5894+5906+673+6751+6752+6755+817+9475+9568	199	39	18.0909	2.15578	2.69585e-06	4.88249e-05	10000;1128;115;134;139760;163688;207;208;2149;2353;2550;2735;2771;2892;2893;3350;338442;4790;488;4886;490;5058;5143;5291;5337;5465;5602;5604;5605;5879;5894;5906;673;6751;6752;6755;817;9475;9568	AKT1;AKT2;ATP2A2;ATP2B1;CALML6;HCAR2;MAPK10;NFKB1;NPY1R;RAC1;RAP1A;ROCK2;SSTR1;SSTR2;SSTR5;ADCY9;ADORA1;AKT3;CAMK2D;F2R;GABBR1;GABBR2;GNAI2;GRIA3;GRIA4;MAP2K1;MAP2K2;PDE4C;PIK3CB;PLD1;RAF1;BRAF;CHRM1;HTR1A;PAK1;GLI1;GPR119;FOS;PPARA
hsa04014	Ras signaling pathway	http://www.kegg.jp/kegg-bin/show_pathway?hsa04014+10000+115727+163688+1950+1956+1969+2002+207+208+2114+2247+2261+26279+27+3479+3551+3791+4254+4790+4915+5058+5062+5291+5319+5320+5321+5337+55770+5578+5582+5602+5604+5605+5879+5894+5906+5921+8315+998	232	39	21.0909	1.84914	0.000106387	0.000608461	10000;115727;163688;1950;1956;1969;2002;207;208;2114;2247;2261;26279;27;3479;3551;3791;4254;4790;4915;5058;5062;5291;5319;5320;5321;5337;55770;5578;5582;5602;5604;5605;5879;5894;5906;5921;8315;998	AKT1;AKT2;CALML6;CDC42;EGF;EGFR;ELK1;FGFR3;IGF1;IKBKB;MAPK10;NFKB1;PLA2G2D;PLA2G4A;PRKCA;RAC1;RAP1A;AKT3;BRAP;KDR;KITLG;MAP2K1;MAP2K2;NTRK2;PAK2;PIK3CB;PLA2G1B;PLA2G2A;PLD1;RAF1;ABL2;EPHA2;ETS2;EXOC2;FGF2;PAK1;PRKCG;RASA1;RASGRP4
hsa05163	Human cytomegalovirus infection	http://www.kegg.jp/kegg-bin/show_pathway?hsa05163+10000+1019+1021+115+1499+163688+1956+1978+2002+207+208+2771+2932+3105+355+3551+3554+3685+4790+5291+5331+54205+5578+5582+5600+5604+5605+5879+5894+595+6198+6300+637+811+836+841+9475+9564	225	38	20.4545	1.85778	0.000117692	0.0006503	10000;1019;1021;115;1499;163688;1956;1978;2002;207;208;2771;2932;3105;355;3551;3554;3685;4790;5291;5331;54205;5578;5582;5600;5604;5605;5879;5894;595;6198;6300;637;811;836;841;9475;9564	AKT1;AKT2;BID;CALML6;CALR;CASP8;CDK4;CDK6;CTNNB1;CYCS;EGFR;ELK1;FAS;IKBKB;IL1R1;MAPK12;NFKB1;PRKCA;RAC1;ROCK2;ADCY9;AKT3;CCND1;GNAI2;HLA-A;MAP2K1;MAP2K2;PIK3CB;RAF1;GSK3B;MAPK11;PLCB3;PRKCG;RPS6KB1;ITGAV;BCAR1;CASP3;EIF4EBP1
hsa05164	Influenza A	http://www.kegg.jp/kegg-bin/show_pathway?hsa05164+10000+1965+207+208+2224+293+2932+3108+3117+3125+3126+3306+3383+3460+355+3551+3592+3593+3717+4615+4790+4793+5291+5371+54205+5578+5600+5602+5604+5605+5606+5646+5894+6300+6772+9451	171	36	15.5455	2.31579	1.13438e-06	2.46539e-05	10000;1965;207;208;2224;293;2932;3108;3117;3125;3126;3306;3383;3460;355;3551;3592;3593;3717;4615;4790;4793;5291;5371;54205;5578;5600;5602;5604;5605;5606;5646;5894;6300;6772;9451	AKT1;AKT2;CYCS;FAS;FDPS;HLA-DMA;HLA-DQA1;HLA-DRB3;HSPA2;ICAM1;IKBKB;MAPK10;MAPK12;MYD88;NFKB1;NFKBIB;PRKCA;AKT3;EIF2AK3;IFNGR2;IL12A;JAK2;MAP2K1;MAP2K2;MAP2K3;PIK3CB;PML;PRSS3;RAF1;STAT1;GSK3B;HLA-DRB4;IL12B;MAPK11;SLC25A6;EIF2S1
hsa05167	Kaposi sarcoma-associated herpesvirus infection	http://www.kegg.jp/kegg-bin/show_pathway?hsa05167+10000+1019+1021+1237+1499+163688+207+208+2247+2353+2920+2932+3105+3383+355+3551+3572+3717+4067+4790+5291+54205+5600+5602+5604+5605+5879+5894+595+6300+637+64422+6772+718+836+841	186	36	16.9091	2.12903	8.78835e-06	0.000110902	10000;1019;1021;1237;1499;163688;207;208;2247;2353;2920;2932;3105;3383;355;3551;3572;3717;4067;4790;5291;54205;5600;5602;5604;5605;5879;5894;595;6300;637;64422;6772;718;836;841	AKT1;AKT2;ATG3;BID;CALML6;CASP8;CDK4;CDK6;CTNNB1;CXCL2;CYCS;FAS;ICAM1;IKBKB;IL6ST;MAPK10;MAPK12;NFKB1;RAC1;AKT3;C3;CCND1;HLA-A;JAK2;MAP2K1;MAP2K2;PIK3CB;RAF1;STAT1;FGF2;GSK3B;LYN;CCR8;MAPK11;CASP3;FOS
hsa04510	Focal adhesion	http://www.kegg.jp/kegg-bin/show_pathway?hsa04510+10000+1499+1950+1956+2002+2064+207+208+2909+2932+3479+3611+3673+3685+3693+3791+3912+4638+5058+5062+5170+5291+5578+5582+5602+5604+5879+5894+5906+595+596+6696+673+9475+9564+998	199	36	18.0909	1.98995	4.09386e-05	0.00033365	10000;1499;1950;1956;2002;2064;207;208;2909;2932;3479;3611;3673;3685;3693;3791;3912;4638;5058;5062;5170;5291;5578;5582;5602;5604;5879;5894;5906;595;596;6696;673;9475;9564;998	AKT1;AKT2;ARHGAP35;CDC42;CTNNB1;EGF;EGFR;ELK1;IGF1;ILK;ITGA2;LAMB1;MAPK10;MYLK;PDPK1;PRKCA;RAC1;RAP1A;ROCK2;SPP1;AKT3;CCND1;KDR;MAP2K1;PAK2;PIK3CB;RAF1;BCL2;BRAF;ERBB2;GSK3B;PAK1;PRKCG;ITGAV;BCAR1;ITGB5
hsa04015	Rap1 signaling pathway	http://www.kegg.jp/kegg-bin/show_pathway?hsa04015+10000+115+1499+163688+1950+1956+1969+207+208+2149+2247+2261+2357+25865+2771+3397+3479+3791+4254+5291+5331+5578+5582+5584+5600+5604+5605+5606+57121+5879+5894+5906+6300+673+9564+998	206	36	18.7273	1.92233	8.66347e-05	0.0005231	10000;115;1499;163688;1950;1956;1969;207;208;2149;2247;2261;2357;25865;2771;3397;3479;3791;4254;5291;5331;5578;5582;5584;5600;5604;5605;5606;57121;5879;5894;5906;6300;673;9564;998	AKT1;AKT2;CALML6;CDC42;CTNNB1;EGF;EGFR;FGFR3;FPR1;ID1;IGF1;LPAR5;MAPK12;PRKCA;PRKCI;PRKD2;RAC1;RAP1A;ADCY9;AKT3;F2R;GNAI2;KDR;KITLG;MAP2K1;MAP2K2;MAP2K3;PIK3CB;RAF1;BRAF;EPHA2;FGF2;MAPK11;PLCB3;PRKCG;BCAR1
hsa04630	JAK-STAT signaling pathway	http://www.kegg.jp/kegg-bin/show_pathway?hsa04630+10000+10254+10401+1439+149233+1950+1956+2056+207+208+2690+316+3460+3558+3566+3568+3572+3589+3592+3593+3597+3600+3717+4170+50604+51588+5291+5292+5618+5894+595+596+6772+8027+8554	162	35	14.7273	2.37654	8.42813e-07	2.11352e-05	10000;10254;10401;1439;149233;1950;1956;2056;207;208;2690;316;3460;3558;3566;3568;3572;3589;3592;3593;3597;3600;3717;4170;50604;51588;5291;5292;5618;5894;595;596;6772;8027;8554	AKT1;AKT2;CSF2RB;EGF;EGFR;EPO;IL15;IL6ST;MCL1;PIAS1;PIAS3;PIM1;STAM;AKT3;AOX1;CCND1;IFNGR2;IL11;IL12A;IL13RA1;IL20;IL4R;IL5RA;JAK2;PIK3CB;RAF1;STAT1;BCL2;IL12B;IL2;IL23R;GHR;PIAS4;PRLR;STAM2
hsa04932	Non-alcoholic fatty liver disease (NAFLD)	http://www.kegg.jp/kegg-bin/show_pathway?hsa04932+10000+10062+1050+1537+1649+1965+207+208+2931+2932+355+3551+3667+4698+4700+4704+4706+4707+4709+4790+5291+54205+5465+5602+5879+637+6392+6720+836+83737+840+841+9451+998	149	34	13.5455	2.51007	3.12099e-07	8.4787e-06	10000;10062;1050;1537;1649;1965;207;208;2931;2932;355;3551;3667;4698;4700;4704;4706;4707;4709;4790;5291;54205;5465;5602;5879;637;6392;6720;836;83737;840;841;9451;998	AKT1;AKT2;BID;CASP8;CDC42;CEBPA;CYCS;FAS;IKBKB;IRS1;MAPK10;NDUFA5;NDUFA9;NFKB1;RAC1;SDHD;AKT3;CYC1;EIF2AK3;NDUFB3;PIK3CB;SREBF1;GSK3A;GSK3B;CASP7;DDIT3;NDUFB1;ITCH;NDUFA6;NDUFAB1;CASP3;EIF2S1;NR1H3;PPARA
hsa05225	Hepatocellular carcinoma	http://www.kegg.jp/kegg-bin/show_pathway?hsa05225+10000+10023+1019+1021+1452+1499+1643+1728+1856+1956+2002+207+208+2932+2950+4258+5291+55274+5578+5582+5604+5605+5894+595+6198+6597+6598+6599+673+7855+8312+8313+8324	167	33	15.1818	2.17365	1.32422e-05	0.000143899	10000;10023;1019;1021;1452;1499;1643;1728;1856;1956;2002;207;208;2932;2950;4258;5291;55274;5578;5582;5604;5605;5894;595;6198;6597;6598;6599;673;7855;8312;8313;8324	AKT1;AKT2;AXIN2;CDK4;CDK6;CTNNB1;DDB2;DVL2;EGFR;ELK1;FRAT1;MGST2;NQO1;PRKCA;AKT3;CCND1;FZD5;GSTP1;MAP2K1;MAP2K2;PIK3CB;RAF1;SMARCB1;AXIN1;BRAF;GSK3B;SMARCC1;FZD7;PRKCG;RPS6KB1;CSNK1A1;PHF10;SMARCA4
hsa05152	Tuberculosis	http://www.kegg.jp/kegg-bin/show_pathway?hsa05152+10000+163688+207+208+2212+3108+3117+3125+3126+3313+3460+3592+3593+3717+4615+4790+4801+527+54205+5600+5602+56848+5894+596+5993+6300+637+6772+718+817+836+841+8625	179	33	16.2727	2.02793	5.79294e-05	0.000393437	10000;163688;207;208;2212;3108;3117;3125;3126;3313;3460;3592;3593;3717;4615;4790;4801;527;54205;5600;5602;56848;5894;596;5993;6300;637;6772;718;817;836;841;8625	AKT1;AKT2;BID;CALML6;CASP8;CYCS;HLA-DMA;HLA-DQA1;HLA-DRB3;HSPA9;MAPK10;MAPK12;MYD88;NFKB1;NFYB;RFX5;RFXANK;SPHK2;AKT3;C3;CAMK2D;IFNGR2;IL12A;JAK2;RAF1;STAT1;BCL2;HLA-DRB4;IL12B;MAPK11;ATP6V0C;FCGR2A;CASP3
hsa05224	Breast cancer	http://www.kegg.jp/kegg-bin/show_pathway?hsa05224+10000+10023+1019+1021+1452+1499+1643+1856+1950+1956+2064+207+208+2099+2247+2353+2932+3479+5241+5291+5604+5605+5894+595+6198+672+673+675+7855+8312+8313+8324	147	32	13.3636	2.39456	2.09859e-06	4.27587e-05	10000;10023;1019;1021;1452;1499;1643;1856;1950;1956;2064;207;208;2099;2247;2353;2932;3479;5241;5291;5604;5605;5894;595;6198;672;673;675;7855;8312;8313;8324	AKT1;AKT2;AXIN2;BRCA1;CDK4;CDK6;CTNNB1;DDB2;DVL2;EGF;EGFR;FRAT1;IGF1;AKT3;BRCA2;CCND1;FZD5;MAP2K1;MAP2K2;PIK3CB;RAF1;AXIN1;BRAF;ERBB2;ESR1;FGF2;GSK3B;FZD7;RPS6KB1;CSNK1A1;PGR;FOS
hsa05170	Human immunodeficiency virus 1 infection	http://www.kegg.jp/kegg-bin/show_pathway?hsa05170+10000+1111+163688+207+208+2353+2771+3105+355+3551+4615+4790+5058+5062+5291+54205+5578+5582+5600+5602+5604+5605+5606+5879+5894+596+6198+6300+637+811+836+841	212	32	19.2727	1.66038	0.00275914	0.0103388	10000;1111;163688;207;208;2353;2771;3105;355;3551;4615;4790;5058;5062;5291;54205;5578;5582;5600;5602;5604;5605;5606;5879;5894;596;6198;6300;637;811;836;841	AKT1;AKT2;BID;CALML6;CALR;CASP8;CYCS;FAS;IKBKB;MAPK10;MAPK12;MYD88;NFKB1;PRKCA;RAC1;AKT3;GNAI2;HLA-A;MAP2K1;MAP2K2;MAP2K3;PAK2;PIK3CB;RAF1;BCL2;CHEK1;PAK1;MAPK11;PRKCG;RPS6KB1;CASP3;FOS
hsa04071	Sphingolipid signaling pathway	http://www.kegg.jp/kegg-bin/show_pathway?hsa04071+10000+134+140+207+208+2771+4790+4985+5170+5291+5331+5337+5515+5523+55304+5578+5582+5600+5602+5604+5605+56848+5879+5894+596+624+6300+637+8879+9475+9517	118	31	10.7273	2.88983	3.42661e-08	2.23415e-06	10000;134;140;207;208;2771;4790;4985;5170;5291;5331;5337;5515;5523;55304;5578;5582;5600;5602;5604;5605;56848;5879;5894;596;624;6300;637;8879;9475;9517	ADORA3;AKT1;AKT2;BDKRB2;BID;MAPK10;MAPK12;NFKB1;PDPK1;PPP2R3A;PRKCA;RAC1;ROCK2;SPHK2;SPTLC2;ADORA1;AKT3;GNAI2;MAP2K1;MAP2K2;OPRD1;PIK3CB;PLD1;RAF1;BCL2;SGPL1;MAPK11;PLCB3;PRKCG;PPP2CA;SPTLC3
hsa04210	Apoptosis	http://www.kegg.jp/kegg-bin/show_pathway?hsa04210+10000+1439+1512+1649+1965+207+208+2353+332+355+3551+4000+4170+4790+5170+5291+5366+54205+5602+5604+5605+5894+596+637+836+840+841+8837+9020+9131+9451	136	31	12.3636	2.50735	1.06709e-06	2.46539e-05	10000;1439;1512;1649;1965;207;208;2353;332;355;3551;4000;4170;4790;5170;5291;5366;54205;5602;5604;5605;5894;596;637;836;840;841;8837;9020;9131;9451	AIFM1;AKT1;AKT2;BID;BIRC5;CASP8;CFLAR;CSF2RB;CTSH;CYCS;FAS;IKBKB;LMNA;MAP3K14;MAPK10;MCL1;NFKB1;PDPK1;AKT3;EIF2AK3;MAP2K1;MAP2K2;PIK3CB;RAF1;BCL2;CASP7;DDIT3;PMAIP1;CASP3;EIF2S1;FOS
hsa04934	Cushing syndrome	http://www.kegg.jp/kegg-bin/show_pathway?hsa04934+1017+1019+1021+115+1499+1583+1584+1586+1856+1956+2516+2771+2932+3776+405+4221+5331+5604+5605+5906+595+673+7855+817+8312+8313+8324+8911+8913+898+9134	154	31	14	2.21429	1.64306e-05	0.000167387	1017;1019;1021;115;1499;1583;1584;1586;1856;1956;2516;2771;2932;3776;405;4221;5331;5604;5605;5906;595;673;7855;817;8312;8313;8324;8911;8913;898;9134	ARNT;AXIN2;CACNA1G;CDK2;CDK4;CDK6;CTNNB1;DVL2;EGFR;MEN1;RAP1A;ADCY9;CACNA1I;CAMK2D;CCND1;CCNE1;CCNE2;CYP11A1;CYP11B1;FZD5;GNAI2;MAP2K1;MAP2K2;AXIN1;BRAF;GSK3B;NR5A1;FZD7;KCNK2;PLCB3;CYP17A1
hsa04810	Regulation of actin cytoskeleton	http://www.kegg.jp/kegg-bin/show_pathway?hsa04810+10094+10552+1128+1131+1133+1950+1956+2149+2247+2261+28964+2909+3673+3685+3693+4638+5058+5062+5291+5604+5605+57121+5879+5894+624+673+79837+8826+9475+9564+998	213	31	19.3636	1.60094	0.00554826	0.0177327	10094;10552;1128;1131;1133;1950;1956;2149;2247;2261;28964;2909;3673;3685;3693;4638;5058;5062;5291;5604;5605;57121;5879;5894;624;673;79837;8826;9475;9564;998	ARHGAP35;ARPC1A;BDKRB2;CDC42;CHRM3;CHRM5;EGF;EGFR;FGFR3;ITGA2;LPAR5;MYLK;PIP4K2C;RAC1;ROCK2;ARPC3;F2R;MAP2K1;MAP2K2;PAK2;PIK3CB;RAF1;BRAF;CHRM1;FGF2;IQGAP1;PAK1;GIT1;ITGAV;BCAR1;ITGB5
hsa04550	Signaling pathways regulating pluripotency of stem cells	http://www.kegg.jp/kegg-bin/show_pathway?hsa04550+10000+10336+1499+1852+1856+207+208+2103+2247+2261+2932+3397+3479+3572+3717+5013+5291+5600+5604+5605+5894+6300+657+7855+8312+8313+8324+84108+90+9314	139	30	12.6364	2.3741	5.25479e-06	7.4481e-05	10000;10336;1499;1852;1856;207;208;2103;2247;2261;2932;3397;3479;3572;3717;5013;5291;5600;5604;5605;5894;6300;657;7855;8312;8313;8324;84108;90;9314	ACVR1;AKT1;AKT2;AXIN2;BMPR1A;CTNNB1;DVL2;ESRRB;FGFR3;ID1;IGF1;IL6ST;MAPK12;PCGF3;AKT3;FZD5;JAK2;KLF4;MAP2K1;MAP2K2;PIK3CB;RAF1;AXIN1;FGF2;GSK3B;PCGF6;FZD7;MAPK11;OTX1;DUSP9
hsa05161	Hepatitis B	http://www.kegg.jp/kegg-bin/show_pathway?hsa05161+10000+1017+1019+1021+1643+1960+2002+207+208+2353+332+355+3551+4615+4790+5291+54205+5578+5582+5602+5604+5605+5894+595+596+6772+836+841+898+9134	144	30	13.0909	2.29167	1.10867e-05	0.00012908	10000;1017;1019;1021;1643;1960;2002;207;208;2353;332;355;3551;4615;4790;5291;54205;5578;5582;5602;5604;5605;5894;595;596;6772;836;841;898;9134	AKT1;AKT2;BIRC5;CASP8;CDK2;CDK4;CDK6;CYCS;DDB2;ELK1;FAS;IKBKB;MAPK10;MYD88;NFKB1;PRKCA;AKT3;CCND1;CCNE1;CCNE2;MAP2K1;MAP2K2;PIK3CB;RAF1;STAT1;BCL2;PRKCG;EGR3;CASP3;FOS
hsa04020	Calcium signaling pathway	http://www.kegg.jp/kegg-bin/show_pathway?hsa04020+10105+1128+1131+1133+115+148+163688+1956+2064+2149+291+2925+293+3358+3361+4638+488+490+5023+5331+5578+5582+56848+5737+624+6546+817+886+8911+8913	183	30	16.6364	1.80328	0.000996956	0.00445216	10105;1128;1131;1133;115;148;163688;1956;2064;2149;291;2925;293;3358;3361;4638;488;490;5023;5331;5578;5582;56848;5737;624;6546;817;886;8911;8913	ATP2A2;ATP2B1;BDKRB2;CACNA1G;CALML6;CCKAR;CHRM3;CHRM5;EGFR;MYLK;PRKCA;PTGFR;SPHK2;ADCY9;ADRA1A;CACNA1I;CAMK2D;F2R;GRPR;HTR2C;P2RX1;PPIF;CHRM1;ERBB2;SLC25A4;SLC8A1;HTR5A;PLCB3;PRKCG;SLC25A6
hsa05168	Herpes simplex infection	http://www.kegg.jp/kegg-bin/show_pathway?hsa05168+1017+1965+2353+3105+3108+3117+3125+3126+3460+355+3551+3592+3593+3600+3717+406+4615+4790+4793+5371+54205+5430+5602+6502+6772+718+727+836+841+9451	185	30	16.8182	1.78378	0.00119317	0.0050516	1017;1965;2353;3105;3108;3117;3125;3126;3460;355;3551;3592;3593;3600;3717;406;4615;4790;4793;5371;54205;5430;5602;6502;6772;718;727;836;841;9451	ARNTL;CASP8;CDK2;CYCS;FAS;HLA-DMA;HLA-DQA1;HLA-DRB3;IKBKB;IL15;MAPK10;MYD88;NFKB1;NFKBIB;POLR2A;C3;EIF2AK3;HLA-A;IFNGR2;IL12A;JAK2;PML;STAT1;HLA-DRB4;IL12B;C5;CASP3;EIF2S1;FOS;SKP2
hsa05145	Toxoplasmosis	http://www.kegg.jp/kegg-bin/show_pathway?hsa05145+10000+10105+207+208+2771+3108+3117+3125+3126+3306+3460+3551+3592+3593+3717+3912+4615+4790+4793+5170+54205+5600+5602+5606+596+6300+6772+836+841	112	29	10.1818	2.84821	1.342e-07	4.37491e-06	10000;10105;207;208;2771;3108;3117;3125;3126;3306;3460;3551;3592;3593;3717;3912;4615;4790;4793;5170;54205;5600;5602;5606;596;6300;6772;836;841	AKT1;AKT2;CASP8;CYCS;HLA-DMA;HLA-DQA1;HLA-DRB3;HSPA2;IKBKB;LAMB1;MAPK10;MAPK12;MYD88;NFKB1;NFKBIB;PDPK1;AKT3;GNAI2;IFNGR2;IL12A;JAK2;MAP2K3;PPIF;STAT1;BCL2;HLA-DRB4;IL12B;MAPK11;CASP3
hsa05226	Gastric cancer	http://www.kegg.jp/kegg-bin/show_pathway?hsa05226+10000+10023+1017+1452+1499+1643+1856+1950+1956+2064+207+208+2247+2932+5291+5604+5605+5894+5915+595+596+6198+673+7855+8312+8313+8324+898+9134	148	29	13.4545	2.15541	5.17216e-05	0.000366549	10000;10023;1017;1452;1499;1643;1856;1950;1956;2064;207;208;2247;2932;5291;5604;5605;5894;5915;595;596;6198;673;7855;8312;8313;8324;898;9134	AKT1;AKT2;AXIN2;CDK2;CTNNB1;DDB2;DVL2;EGF;EGFR;FRAT1;RARB;AKT3;CCND1;CCNE1;CCNE2;FZD5;MAP2K1;MAP2K2;PIK3CB;RAF1;AXIN1;BCL2;BRAF;ERBB2;FGF2;GSK3B;FZD7;RPS6KB1;CSNK1A1
hsa04022	cGMP-PKG signaling pathway	http://www.kegg.jp/kegg-bin/show_pathway?hsa04022+10000+10105+115+134+140+148+150+151+152+163688+207+208+2771+291+293+3667+4638+488+490+4985+5331+5604+5605+5894+5997+624+6546+8654+9475	163	29	14.8182	1.95706	0.000303895	0.00157253	10000;10105;115;134;140;148;150;151;152;163688;207;208;2771;291;293;3667;4638;488;490;4985;5331;5604;5605;5894;5997;624;6546;8654;9475	ADORA3;ADRA2A;AKT1;AKT2;ATP2A2;ATP2B1;BDKRB2;CALML6;IRS1;MYLK;ROCK2;ADCY9;ADORA1;ADRA1A;ADRA2C;AKT3;GNAI2;MAP2K1;MAP2K2;OPRD1;PPIF;RAF1;RGS2;SLC25A4;SLC8A1;ADRA2B;PDE5A;PLCB3;SLC25A6
hsa04062	Chemokine signaling pathway	http://www.kegg.jp/kegg-bin/show_pathway?hsa04062+10000+115+1237+207+208+2771+2869+2920+2931+2932+3551+3702+3717+4067+4790+4793+5058+5291+5331+5580+5604+5879+5894+5906+673+6772+9475+9564+998	189	29	17.1818	1.68783	0.00335231	0.0117511	10000;115;1237;207;208;2771;2869;2920;2931;2932;3551;3702;3717;4067;4790;4793;5058;5291;5331;5580;5604;5879;5894;5906;673;6772;9475;9564;998	AKT1;AKT2;CDC42;CXCL2;GRK5;IKBKB;NFKB1;NFKBIB;PRKCD;RAC1;RAP1A;ROCK2;ADCY9;AKT3;GNAI2;ITK;JAK2;MAP2K1;PIK3CB;RAF1;STAT1;BRAF;GSK3A;GSK3B;LYN;PAK1;CCR8;PLCB3;BCAR1
hsa05210	Colorectal cancer	http://www.kegg.jp/kegg-bin/show_pathway?hsa05210+10000+1499+1643+1950+1956+207+208+2353+2932+2956+332+4436+5291+5366+54205+5602+5604+5605+5879+5894+595+596+6198+673+8312+8313+836	86	27	7.81818	3.45349	4.12849e-09	4.48629e-07	10000;1499;1643;1950;1956;207;208;2353;2932;2956;332;4436;5291;5366;54205;5602;5604;5605;5879;5894;595;596;6198;673;8312;8313;836	AKT1;AKT2;AXIN2;BIRC5;CTNNB1;CYCS;DDB2;EGF;EGFR;MAPK10;RAC1;AKT3;CCND1;MAP2K1;MAP2K2;PIK3CB;RAF1;AXIN1;BCL2;BRAF;GSK3B;MSH2;MSH6;PMAIP1;RPS6KB1;CASP3;FOS
hsa05418	Fluid shear stress and atherosclerosis	http://www.kegg.jp/kegg-bin/show_pathway?hsa05418+10000+1499+163688+1728+207+208+2353+27035+2817+2950+3383+3551+3554+3685+3791+4258+4790+51588+5291+5600+5602+5879+596+6300+657+7850+90	138	27	12.5455	2.15217	9.57399e-05	0.000567476	10000;1499;163688;1728;207;208;2353;27035;2817;2950;3383;3551;3554;3685;3791;4258;4790;51588;5291;5600;5602;5879;596;6300;657;7850;90	ACVR1;AKT1;AKT2;BMPR1A;CALML6;CTNNB1;GPC1;ICAM1;IKBKB;IL1R1;MAPK10;MAPK12;MGST2;NFKB1;NOX1;NQO1;RAC1;AKT3;GSTP1;KDR;PIK3CB;BCL2;MAPK11;PIAS4;IL1R2;ITGAV;FOS
hsa04218	Cellular senescence	http://www.kegg.jp/kegg-bin/show_pathway?hsa04218+10000+1017+1019+1021+1111+11200+163688+1978+207+208+2308+291+293+3105+4605+4790+5291+5600+5604+5605+5606+5894+595+6300+898+9134+993	160	27	14.5455	1.85625	0.00112671	0.00483299	10000;1017;1019;1021;1111;11200;163688;1978;207;208;2308;291;293;3105;4605;4790;5291;5600;5604;5605;5606;5894;595;6300;898;9134;993	AKT1;AKT2;CALML6;CDC25A;CDK2;CDK4;CDK6;CHEK2;MAPK12;MYBL2;NFKB1;AKT3;CCND1;CCNE1;CCNE2;HLA-A;MAP2K1;MAP2K2;MAP2K3;PIK3CB;RAF1;CHEK1;FOXO1;SLC25A4;MAPK11;SLC25A6;EIF4EBP1
hsa05215	Prostate cancer	http://www.kegg.jp/kegg-bin/show_pathway?hsa05215+10000+1017+1499+1950+1956+2064+207+2078+208+2308+2932+2950+3479+3551+4790+5170+5291+5604+5605+5894+595+596+673+7850+898+9134	97	26	8.81818	2.94845	2.86761e-07	8.4787e-06	10000;1017;1499;1950;1956;2064;207;2078;208;2308;2932;2950;3479;3551;4790;5170;5291;5604;5605;5894;595;596;673;7850;898;9134	AKT1;AKT2;CDK2;CTNNB1;EGF;EGFR;ERG;IGF1;IKBKB;NFKB1;PDPK1;AKT3;CCND1;CCNE1;CCNE2;GSTP1;MAP2K1;MAP2K2;PIK3CB;RAF1;BCL2;BRAF;ERBB2;FOXO1;GSK3B;IL1R2
hsa04722	Neurotrophin signaling pathway	http://www.kegg.jp/kegg-bin/show_pathway?hsa04722+10000+163688+207+208+2932+3551+3667+397+4790+4793+4915+5170+5291+5580+5600+5602+5604+5605+5879+5894+5906+596+6300+673+817+998	119	26	10.8182	2.40336	1.76728e-05	0.000169451	10000;163688;207;208;2932;3551;3667;397;4790;4793;4915;5170;5291;5580;5600;5602;5604;5605;5879;5894;5906;596;6300;673;817;998	AKT1;AKT2;ARHGDIB;CALML6;CDC42;IKBKB;IRS1;MAPK10;MAPK12;NFKB1;NFKBIB;PDPK1;PRKCD;RAC1;RAP1A;AKT3;CAMK2D;MAP2K1;MAP2K2;NTRK2;PIK3CB;RAF1;BCL2;BRAF;GSK3B;MAPK11
hsa04140	Autophagy	http://www.kegg.jp/kegg-bin/show_pathway?hsa04140+10000+10533+10645+1965+207+208+29982+30849+3146+3476+3667+5170+5291+5515+5580+5602+5604+5605+5894+596+6198+64422+664+8837+9451+9474	128	26	11.6364	2.23438	6.6784e-05	0.000440477	10000;10533;10645;1965;207;208;29982;30849;3146;3476;3667;5170;5291;5515;5580;5602;5604;5605;5894;596;6198;64422;664;8837;9451;9474	AKT1;AKT2;ATG3;ATG5;ATG7;BNIP3;CAMKK2;CFLAR;IGBP1;IRS1;MAPK10;PDPK1;PIK3R4;PRKCD;AKT3;EIF2AK3;MAP2K1;MAP2K2;PIK3CB;RAF1;BCL2;NRBF2;RPS6KB1;HMGB1;PPP2CA;EIF2S1
hsa04728	Dopaminergic synapse	http://www.kegg.jp/kegg-bin/show_pathway?hsa04728+10000+1312+163688+1814+1815+207+208+2353+2771+2892+2893+2931+2932+3800+406+4128+50632+5331+5515+5523+5578+5582+5600+5602+6300+817	131	26	11.9091	2.18321	0.000100279	0.00058377	10000;1312;163688;1814;1815;207;208;2353;2771;2892;2893;2931;2932;3800;406;4128;50632;5331;5515;5523;5578;5582;5600;5602;6300;817	AKT1;AKT2;ARNTL;CALML6;CALY;DRD4;MAPK10;MAPK12;PPP2R3A;PRKCA;AKT3;CAMK2D;DRD3;GNAI2;GRIA3;GRIA4;GSK3A;GSK3B;MAOA;COMT;MAPK11;PLCB3;PRKCG;KIF5C;PPP2CA;FOS
hsa04068	FoxO signaling pathway	http://www.kegg.jp/kegg-bin/show_pathway?hsa04068+10000+1017+1454+1950+1956+207+208+2308+3479+3551+3667+5106+5170+5291+5600+5602+5604+5605+5894+595+604+6300+6446+6502+664+673	132	26	12	2.16667	0.000114399	0.000643002	10000;1017;1454;1950;1956;207;208;2308;3479;3551;3667;5106;5170;5291;5600;5602;5604;5605;5894;595;604;6300;6446;6502;664;673	AKT1;AKT2;BNIP3;CDK2;CSNK1E;EGF;EGFR;IGF1;IKBKB;IRS1;MAPK10;MAPK12;PDPK1;SGK1;AKT3;CCND1;MAP2K1;MAP2K2;PIK3CB;RAF1;BCL6;BRAF;FOXO1;MAPK11;PCK2;SKP2
hsa05142	Chagas disease (American trypanosomiasis)	http://www.kegg.jp/kegg-bin/show_pathway?hsa05142+10000+1636+207+208+2353+2771+3460+355+3551+3558+3592+3593+4615+4790+5291+5331+5515+5600+5602+624+6300+718+811+841+8837	102	25	9.27273	2.69608	2.9455e-06	5.05386e-05	10000;1636;207;208;2353;2771;3460;355;3551;3558;3592;3593;4615;4790;5291;5331;5515;5600;5602;624;6300;718;811;841;8837	ACE;AKT1;AKT2;BDKRB2;CALR;CASP8;CFLAR;FAS;IKBKB;MAPK10;MAPK12;MYD88;NFKB1;AKT3;C3;GNAI2;IFNGR2;IL12A;PIK3CB;IL12B;IL2;MAPK11;PLCB3;PPP2CA;FOS
hsa05162	Measles	http://www.kegg.jp/kegg-bin/show_pathway?hsa05162+10000+1017+1019+1021+1965+207+208+2932+3306+3460+355+3558+3592+3593+3717+4615+4790+4793+5291+595+6772+8667+898+9134+9451	132	25	12	2.08333	0.000292531	0.00154678	10000;1017;1019;1021;1965;207;208;2932;3306;3460;355;3558;3592;3593;3717;4615;4790;4793;5291;595;6772;8667;898;9134;9451	AKT1;AKT2;CDK2;CDK4;CDK6;EIF3H;FAS;HSPA2;MYD88;NFKB1;NFKBIB;AKT3;CCND1;CCNE1;CCNE2;EIF2AK3;IFNGR2;IL12A;JAK2;PIK3CB;STAT1;GSK3B;IL12B;IL2;EIF2S1
hsa04910	Insulin signaling pathway	http://www.kegg.jp/kegg-bin/show_pathway?hsa04910+10000+163688+1978+2002+207+208+2308+2932+3098+31+32+3551+3667+5106+5170+5291+5584+5602+5604+5605+5792+5894+6198+6720+673	137	25	12.4545	2.0073	0.000526243	0.00248631	10000;163688;1978;2002;207;208;2308;2932;3098;31;32;3551;3667;5106;5170;5291;5584;5602;5604;5605;5792;5894;6198;6720;673	ACACA;ACACB;AKT1;AKT2;CALML6;ELK1;HK1;IKBKB;IRS1;MAPK10;PDPK1;PRKCI;AKT3;MAP2K1;MAP2K2;PIK3CB;PTPRF;RAF1;SREBF1;BRAF;FOXO1;GSK3B;PCK2;RPS6KB1;EIF4EBP1
hsa05206	MicroRNAs in cancer	http://www.kegg.jp/kegg-bin/show_pathway?hsa05206+1021+1789+1956+2064+2261+23405+3551+3667+4170+4790+5268+5292+5578+5582+5604+5605+5894+595+596+6659+672+836+898+9134+993	150	25	13.6364	1.83333	0.00202425	0.00795068	1021;1789;1956;2064;2261;23405;3551;3667;4170;4790;5268;5292;5578;5582;5604;5605;5894;595;596;6659;672;836;898;9134;993	BRCA1;CDC25A;CDK6;EGFR;FGFR3;IKBKB;IRS1;MCL1;NFKB1;PIM1;PRKCA;SERPINB5;CCND1;CCNE1;CCNE2;MAP2K1;MAP2K2;RAF1;BCL2;DICER1;ERBB2;SOX4;PRKCG;CASP3;DNMT3B
hsa01521	EGFR tyrosine kinase inhibitor resistance	http://www.kegg.jp/kegg-bin/show_pathway?hsa01521+10000+1950+1956+1978+2064+207+208+2247+2261+2621+2932+3479+3717+3791+5291+5578+558+5582+5604+5605+5894+596+6198+673	79	24	7.18182	3.34177	6.1838e-08	2.90216e-06	10000;1950;1956;1978;2064;207;208;2247;2261;2621;2932;3479;3717;3791;5291;5578;558;5582;5604;5605;5894;596;6198;673	AKT1;AKT2;EGF;EGFR;FGFR3;GAS6;IGF1;PRKCA;AKT3;JAK2;KDR;MAP2K1;MAP2K2;PIK3CB;RAF1;BCL2;BRAF;ERBB2;FGF2;GSK3B;AXL;PRKCG;RPS6KB1;EIF4EBP1
hsa05231	Choline metabolism in cancer	http://www.kegg.jp/kegg-bin/show_pathway?hsa05231+10000+1120+1950+1956+1978+207+208+2353+5170+5291+5321+5337+5578+5582+5602+5604+5605+5879+5894+6198+6582+6583+6584+8527	99	24	9	2.66667	5.70079e-06	7.74357e-05	10000;1120;1950;1956;1978;207;208;2353;5170;5291;5321;5337;5578;5582;5602;5604;5605;5879;5894;6198;6582;6583;6584;8527	AKT1;AKT2;DGKD;EGF;EGFR;MAPK10;PDPK1;PLA2G4A;PRKCA;RAC1;SLC22A5;AKT3;CHKB;MAP2K1;MAP2K2;PIK3CB;PLD1;RAF1;SLC22A2;PRKCG;RPS6KB1;SLC22A4;EIF4EBP1;FOS
hsa04668	TNF signaling pathway	http://www.kegg.jp/kegg-bin/show_pathway?hsa04668+10000+1326+207+208+2353+2920+3383+355+3551+3600+4323+4790+5291+5600+5602+5604+5606+6300+836+83737+840+841+8837+9020	110	24	10	2.4	3.78869e-05	0.000316696	10000;1326;207;208;2353;2920;3383;355;3551;3600;4323;4790;5291;5600;5602;5604;5606;6300;836;83737;840;841;8837;9020	AKT1;AKT2;CASP8;CFLAR;CXCL2;FAS;ICAM1;IKBKB;IL15;MAP3K14;MAPK10;MAPK12;MMP14;NFKB1;AKT3;MAP2K1;MAP2K3;PIK3CB;CASP7;MAPK11;ITCH;MAP3K8;CASP3;FOS
hsa04725	Cholinergic synapse	http://www.kegg.jp/kegg-bin/show_pathway?hsa04725+10000+1128+1131+1133+1137+1141+115+207+208+2353+2771+3717+3768+3785+43+5291+5331+5578+5582+5604+596+817+8973+9132	112	24	10.1818	2.35714	5.16397e-05	0.000366549	10000;1128;1131;1133;1137;1141;115;207;208;2353;2771;3717;3768;3785;43;5291;5331;5578;5582;5604;596;817;8973;9132	AKT1;AKT2;CHRM3;CHRM5;CHRNB2;KCNJ12;KCNQ2;KCNQ4;PRKCA;ADCY9;AKT3;CAMK2D;CHRNA6;GNAI2;JAK2;MAP2K1;PIK3CB;BCL2;CHRM1;PLCB3;PRKCG;CHRNA4;ACHE;FOS
hsa05212	Pancreatic cancer	http://www.kegg.jp/kegg-bin/show_pathway?hsa05212+10000+1019+1021+1643+1950+1956+2064+207+208+3551+4790+5291+5337+5602+5604+5879+5894+595+6198+673+675+6772+998	75	23	6.81818	3.37333	9.6133e-08	3.48215e-06	10000;1019;1021;1643;1950;1956;2064;207;208;3551;4790;5291;5337;5602;5604;5879;5894;595;6198;673;675;6772;998	AKT1;AKT2;CDC42;CDK4;CDK6;DDB2;EGF;EGFR;IKBKB;MAPK10;NFKB1;RAC1;AKT3;BRCA2;CCND1;MAP2K1;PIK3CB;PLD1;RAF1;STAT1;BRAF;ERBB2;RPS6KB1
hsa01522	Endocrine resistance	http://www.kegg.jp/kegg-bin/show_pathway?hsa01522+10000+1019+115+1565+1956+2064+207+208+2099+2353+3479+5291+5469+5600+5602+5604+5605+5894+595+596+6198+6300+673	98	23	8.90909	2.58163	1.58011e-05	0.000166167	10000;1019;115;1565;1956;2064;207;208;2099;2353;3479;5291;5469;5600;5602;5604;5605;5894;595;596;6198;6300;673	AKT1;AKT2;CDK4;EGFR;IGF1;MAPK10;MAPK12;ADCY9;AKT3;CCND1;MAP2K1;MAP2K2;PIK3CB;RAF1;BCL2;BRAF;CYP2D6;ERBB2;ESR1;MAPK11;RPS6KB1;MED1;FOS
hsa04933	AGE-RAGE signaling pathway in diabetic complications	http://www.kegg.jp/kegg-bin/show_pathway?hsa04933+10000+1019+207+208+2308+27035+3383+3717+4790+5291+5292+5331+5578+5580+5600+5602+5879+595+596+6300+6772+836+998	99	23	9	2.55556	1.88578e-05	0.000170768	10000;1019;207;208;2308;27035;3383;3717;4790;5291;5292;5331;5578;5580;5600;5602;5879;595;596;6300;6772;836;998	AKT1;AKT2;CDC42;CDK4;ICAM1;MAPK10;MAPK12;NFKB1;NOX1;PIM1;PRKCA;PRKCD;RAC1;AKT3;CCND1;JAK2;PIK3CB;STAT1;BCL2;FOXO1;MAPK11;PLCB3;CASP3
hsa04660	T cell receptor signaling pathway	http://www.kegg.jp/kegg-bin/show_pathway?hsa04660+10000+1019+1326+207+208+2353+2932+3551+3558+3702+4790+4793+5058+5062+5170+5291+5600+5604+5605+5894+6300+9020+998	101	23	9.18182	2.50495	2.66201e-05	0.000228373	10000;1019;1326;207;208;2353;2932;3551;3558;3702;4790;4793;5058;5062;5170;5291;5600;5604;5605;5894;6300;9020;998	AKT1;AKT2;CDC42;CDK4;IKBKB;MAP3K14;MAPK12;NFKB1;NFKBIB;PDPK1;AKT3;ITK;MAP2K1;MAP2K2;PAK2;PIK3CB;RAF1;GSK3B;IL2;PAK1;MAPK11;MAP3K8;FOS
hsa04915	Estrogen signaling pathway	http://www.kegg.jp/kegg-bin/show_pathway?hsa04915+10000+10499+115+147183+163688+1956+207+208+2099+2353+2550+2771+3306+3880+5241+5291+5331+5580+5604+5605+5894+596+9568	137	23	12.4545	1.84672	0.00273321	0.0103388	10000;10499;115;147183;163688;1956;207;208;2099;2353;2550;2771;3306;3880;5241;5291;5331;5580;5604;5605;5894;596;9568	AKT1;AKT2;CALML6;EGFR;HSPA2;KRT25;NCOA2;PRKCD;ADCY9;AKT3;GABBR1;GABBR2;GNAI2;KRT19;MAP2K1;MAP2K2;PIK3CB;RAF1;BCL2;ESR1;PLCB3;PGR;FOS
hsa04261	Adrenergic signaling in cardiomyocytes	http://www.kegg.jp/kegg-bin/show_pathway?hsa04261+10000+115+1390+148+163688+186+207+208+2771+488+490+5331+5515+5523+5578+55799+5600+596+6300+6546+781+783+817	144	23	13.0909	1.75694	0.00518387	0.0167321	10000;115;1390;148;163688;186;207;208;2771;488;490;5331;5515;5523;5578;55799;5600;596;6300;6546;781;783;817	AKT1;AKT2;ATP2A2;ATP2B1;CACNA2D3;CALML6;MAPK12;PPP2R3A;PRKCA;ADCY9;ADRA1A;AKT3;CACNA2D1;CAMK2D;GNAI2;BCL2;CACNB2;CREM;SLC8A1;MAPK11;PLCB3;PPP2CA;AGTR2
hsa04150	mTOR signaling pathway	http://www.kegg.jp/kegg-bin/show_pathway?hsa04150+10000+1856+1978+207+208+2932+3479+3551+3667+51382+5170+5291+5578+5582+5604+5605+5894+6198+6446+6502+673+7855+8324	151	23	13.7273	1.6755	0.00923266	0.028106	10000;1856;1978;207;208;2932;3479;3551;3667;51382;5170;5291;5578;5582;5604;5605;5894;6198;6446;6502;673;7855;8324	AKT1;AKT2;DVL2;IGF1;IKBKB;IRS1;PDPK1;PRKCA;SGK1;AKT3;ATP6V1D;FZD5;MAP2K1;MAP2K2;PIK3CB;RAF1;BRAF;GSK3B;FZD7;PRKCG;RPS6KB1;EIF4EBP1;SKP2
hsa04921	Oxytocin signaling pathway	http://www.kegg.jp/kegg-bin/show_pathway?hsa04921+10645+115+163688+1956+2002+2353+2771+3768+4638+5321+5331+5578+55799+5582+5604+5605+5894+595+5997+781+783+817+9475	152	23	13.8182	1.66447	0.00997876	0.0298447	10645;115;163688;1956;2002;2353;2771;3768;4638;5321;5331;5578;55799;5582;5604;5605;5894;595;5997;781;783;817;9475	CACNA2D3;CALML6;CAMKK2;EGFR;ELK1;KCNJ12;MYLK;PLA2G4A;PRKCA;ROCK2;ADCY9;CACNA2D1;CAMK2D;CCND1;GNAI2;MAP2K1;MAP2K2;RAF1;CACNB2;RGS2;PLCB3;PRKCG;FOS
hsa04012	ErbB signaling pathway	http://www.kegg.jp/kegg-bin/show_pathway?hsa04012+10000+1950+1956+1978+2002+2064+207+208+27+2932+5058+5062+5291+5578+5582+5602+5604+5605+5894+6198+673+817	85	22	7.72727	2.84706	4.4389e-06	6.57765e-05	10000;1950;1956;1978;2002;2064;207;208;27;2932;5058;5062;5291;5578;5582;5602;5604;5605;5894;6198;673;817	AKT1;AKT2;EGF;EGFR;ELK1;MAPK10;PRKCA;AKT3;CAMK2D;MAP2K1;MAP2K2;PAK2;PIK3CB;RAF1;ABL2;BRAF;ERBB2;GSK3B;PAK1;PRKCG;RPS6KB1;EIF4EBP1
hsa05222	Small cell lung cancer	http://www.kegg.jp/kegg-bin/show_pathway?hsa05222+10000+1017+1019+1021+1163+1643+207+208+3551+3673+3685+3912+4790+5291+54205+5915+595+596+6502+836+898+9134	92	22	8.36364	2.63043	1.75827e-05	0.000169451	10000;1017;1019;1021;1163;1643;207;208;3551;3673;3685;3912;4790;5291;54205;5915;595;596;6502;836;898;9134	AKT1;AKT2;CDK2;CDK4;CDK6;CKS1B;CYCS;DDB2;IKBKB;ITGA2;LAMB1;NFKB1;RARB;AKT3;CCND1;CCNE1;CCNE2;PIK3CB;BCL2;ITGAV;CASP3;SKP2
hsa04066	HIF-1 signaling pathway	http://www.kegg.jp/kegg-bin/show_pathway?hsa04066+10000+1950+1956+1978+2056+2064+207+208+3098+3460+3479+405+4055+4790+5291+5578+5582+5604+5605+596+6198+817	100	22	9.09091	2.42	6.93683e-05	0.000443413	10000;1950;1956;1978;2056;2064;207;208;3098;3460;3479;405;4055;4790;5291;5578;5582;5604;5605;596;6198;817	AKT1;AKT2;ARNT;EGF;EGFR;EPO;HK1;IGF1;LTBR;NFKB1;PRKCA;AKT3;CAMK2D;IFNGR2;MAP2K1;MAP2K2;PIK3CB;BCL2;ERBB2;PRKCG;RPS6KB1;EIF4EBP1
hsa04919	Thyroid hormone signaling pathway	http://www.kegg.jp/kegg-bin/show_pathway?hsa04919+10000+10499+116931+1499+207+208+2099+2308+2932+3685+488+5170+5291+5331+5469+5578+5582+5604+5605+5894+595+6772	116	22	10.5455	2.08621	0.000651446	0.00299114	10000;10499;116931;1499;207;208;2099;2308;2932;3685;488;5170;5291;5331;5469;5578;5582;5604;5605;5894;595;6772	AKT1;AKT2;ATP2A2;CTNNB1;MED12L;NCOA2;PDPK1;PRKCA;AKT3;CCND1;MAP2K1;MAP2K2;PIK3CB;RAF1;STAT1;ESR1;FOXO1;GSK3B;PLCB3;PRKCG;ITGAV;MED1
hsa04611	Platelet activation	http://www.kegg.jp/kegg-bin/show_pathway?hsa04611+10000+115+207+208+2149+2212+2243+2771+2909+3673+4067+4638+5023+5291+5321+5331+5584+5600+5906+6300+695+9475	123	22	11.1818	1.96748	0.00146435	0.00589356	10000;115;207;208;2149;2212;2243;2771;2909;3673;4067;4638;5023;5291;5321;5331;5584;5600;5906;6300;695;9475	AKT1;AKT2;ARHGAP35;FGA;ITGA2;MAPK12;MYLK;PLA2G4A;PRKCI;RAP1A;ROCK2;ADCY9;AKT3;BTK;F2R;GNAI2;P2RX1;PIK3CB;LYN;MAPK11;PLCB3;FCGR2A
hsa04380	Osteoclast differentiation	http://www.kegg.jp/kegg-bin/show_pathway?hsa04380+10000+207+208+2212+2353+27035+3460+3551+3554+4286+4790+5291+55423+5600+5602+5604+5879+6300+6772+695+8061+9020	128	22	11.6364	1.89062	0.00247778	0.009503	10000;207;208;2212;2353;27035;3460;3551;3554;4286;4790;5291;55423;5600;5602;5604;5879;6300;6772;695;8061;9020	AKT1;AKT2;IKBKB;IL1R1;MAP3K14;MAPK10;MAPK12;NFKB1;NOX1;RAC1;AKT3;BTK;IFNGR2;MAP2K1;PIK3CB;SIRPG;STAT1;FOSL1;MAPK11;MITF;FCGR2A;FOS
hsa05160	Hepatitis C	http://www.kegg.jp/kegg-bin/show_pathway?hsa05160+10000+10062+1950+1956+1965+207+208+2932+3551+4790+5170+5291+5465+5515+5600+5602+5894+6300+673+6772+8554+9451	131	22	11.9091	1.84733	0.00333254	0.0117511	10000;10062;1950;1956;1965;207;208;2932;3551;4790;5170;5291;5465;5515;5600;5602;5894;6300;673;6772;8554;9451	AKT1;AKT2;EGF;EGFR;IKBKB;MAPK10;MAPK12;NFKB1;PDPK1;PIAS1;AKT3;EIF2AK3;PIK3CB;RAF1;STAT1;BRAF;GSK3B;MAPK11;PPP2CA;EIF2S1;NR1H3;PPARA
hsa04072	Phospholipase D signaling pathway	http://www.kegg.jp/kegg-bin/show_pathway?hsa04072+10000+115+1950+1956+207+208+2149+2912+2913+4254+5291+5321+5331+5337+5578+5604+5605+56848+57121+5737+5894+8527	146	22	13.2727	1.65753	0.0121339	0.0353183	10000;115;1950;1956;207;208;2149;2912;2913;4254;5291;5321;5331;5337;5578;5604;5605;56848;57121;5737;5894;8527	AKT1;AKT2;DGKD;EGF;EGFR;GRM2;GRM3;LPAR5;PLA2G4A;PRKCA;PTGFR;SPHK2;ADCY9;AKT3;F2R;KITLG;MAP2K1;MAP2K2;PIK3CB;PLD1;RAF1;PLCB3
hsa04666	Fc gamma R-mediated phagocytosis	http://www.kegg.jp/kegg-bin/show_pathway?hsa04666+10000+10094+10552+207+208+2212+3635+4067+5058+5291+5321+5337+5578+5580+5582+5604+56848+5879+5894+6198+998	91	21	8.27273	2.53846	4.8055e-05	0.000356451	10000;10094;10552;207;208;2212;3635;4067;5058;5291;5321;5337;5578;5580;5582;5604;56848;5879;5894;6198;998	AKT1;AKT2;ARPC1A;CDC42;INPP5D;PLA2G4A;PRKCA;PRKCD;RAC1;SPHK2;AKT3;ARPC3;MAP2K1;PIK3CB;PLD1;RAF1;LYN;PAK1;PRKCG;RPS6KB1;FCGR2A
hsa04912	GnRH signaling pathway	http://www.kegg.jp/kegg-bin/show_pathway?hsa04912+10746+115+163688+1956+2002+4216+4323+5321+5331+5337+5578+5580+5600+5602+5604+5605+5606+5894+6300+817+998	93	21	8.45455	2.48387	6.75578e-05	0.000440477	10746;115;163688;1956;2002;4216;4323;5321;5331;5337;5578;5580;5600;5602;5604;5605;5606;5894;6300;817;998	CALML6;CDC42;EGFR;ELK1;MAP3K2;MAPK10;MAPK12;MMP14;PLA2G4A;PRKCA;PRKCD;ADCY9;CAMK2D;MAP2K1;MAP2K2;MAP2K3;MAP3K4;PLD1;RAF1;MAPK11;PLCB3
hsa04620	Toll-like receptor signaling pathway	http://www.kegg.jp/kegg-bin/show_pathway?hsa04620+10000+1326+207+208+2353+3551+3592+3593+4615+4790+5291+5600+5602+5604+5605+5606+5879+6300+6696+6772+841	104	21	9.45455	2.22115	0.000358248	0.00179675	10000;1326;207;208;2353;3551;3592;3593;4615;4790;5291;5600;5602;5604;5605;5606;5879;6300;6696;6772;841	AKT1;AKT2;CASP8;IKBKB;MAPK10;MAPK12;MYD88;NFKB1;RAC1;SPP1;AKT3;IL12A;MAP2K1;MAP2K2;MAP2K3;PIK3CB;STAT1;IL12B;MAPK11;MAP3K8;FOS
hsa04659	Th17 cell differentiation	http://www.kegg.jp/kegg-bin/show_pathway?hsa04659+149233+2353+2625+3108+3117+3125+3126+3460+3551+3554+3558+3566+3572+3717+4790+4793+5600+5602+6300+6772+861	107	21	9.72727	2.15888	0.00053535	0.0024932	149233;2353;2625;3108;3117;3125;3126;3460;3551;3554;3558;3566;3572;3717;4790;4793;5600;5602;6300;6772;861	GATA3;HLA-DMA;HLA-DQA1;HLA-DRB3;IKBKB;IL1R1;IL6ST;MAPK10;MAPK12;NFKB1;NFKBIB;IFNGR2;IL4R;JAK2;RUNX1;STAT1;HLA-DRB4;IL2;IL23R;MAPK11;FOS
hsa04110	Cell cycle	http://www.kegg.jp/kegg-bin/show_pathway?hsa04110+1017+1019+1021+1111+11200+2810+2932+4173+4174+4175+4176+4998+595+6502+701+8317+898+9134+9184+9232+993	124	21	11.2727	1.8629	0.00368719	0.0127875	1017;1019;1021;1111;11200;2810;2932;4173;4174;4175;4176;4998;595;6502;701;8317;898;9134;9184;9232;993	CDC25A;CDK2;CDK4;CDK6;CHEK2;MCM5;ORC1;PTTG1;BUB1B;CCND1;CCNE1;CCNE2;CDC7;CHEK1;GSK3B;MCM6;SFN;BUB3;MCM4;MCM7;SKP2
hsa05213	Endometrial cancer	http://www.kegg.jp/kegg-bin/show_pathway?hsa05213+10000+1499+1643+1950+1956+2002+2064+207+208+2932+3611+5170+5291+5604+5605+5894+595+673+8312+8313	58	20	5.27273	3.7931	7.50483e-08	3.05822e-06	10000;1499;1643;1950;1956;2002;2064;207;208;2932;3611;5170;5291;5604;5605;5894;595;673;8312;8313	AKT1;AKT2;AXIN2;CTNNB1;DDB2;EGF;EGFR;ELK1;ILK;PDPK1;AKT3;CCND1;MAP2K1;MAP2K2;PIK3CB;RAF1;AXIN1;BRAF;ERBB2;GSK3B
hsa04115	p53 signaling pathway	http://www.kegg.jp/kegg-bin/show_pathway?hsa04115+1017+1019+1021+1111+11200+1643+2810+3479+355+5268+5366+54205+595+596+6241+637+836+841+898+9134	72	20	6.54545	3.05556	3.72681e-06	5.78543e-05	1017;1019;1021;1111;11200;1643;2810;3479;355;5268;5366;54205;595;596;6241;637;836;841;898;9134	BID;CASP8;CDK2;CDK4;CDK6;CHEK2;CYCS;DDB2;FAS;IGF1;SERPINB5;CCND1;CCNE1;CCNE2;RRM2;BCL2;CHEK1;SFN;PMAIP1;CASP3
hsa04625	C-type lectin receptor signaling pathway	http://www.kegg.jp/kegg-bin/show_pathway?hsa04625+10000+163688+1960+207+208+3551+3558+3592+3593+4790+5058+5291+5580+5600+5602+5894+6300+6772+841+9020	104	20	9.45455	2.11538	0.000942766	0.00426863	10000;163688;1960;207;208;3551;3558;3592;3593;4790;5058;5291;5580;5600;5602;5894;6300;6772;841;9020	AKT1;AKT2;CALML6;CASP8;IKBKB;MAP3K14;MAPK10;MAPK12;NFKB1;PRKCD;AKT3;IL12A;PIK3CB;RAF1;STAT1;IL12B;IL2;PAK1;MAPK11;EGR3
hsa05223	Non-small cell lung cancer	http://www.kegg.jp/kegg-bin/show_pathway?hsa05223+10000+1019+1021+1643+1950+1956+2064+207+208+5170+5291+5578+5582+5604+5605+5894+5915+595+673	66	19	6	3.16667	3.63935e-06	5.78543e-05	10000;1019;1021;1643;1950;1956;2064;207;208;5170;5291;5578;5582;5604;5605;5894;5915;595;673	AKT1;AKT2;CDK4;CDK6;DDB2;EGF;EGFR;PDPK1;PRKCA;RARB;AKT3;CCND1;MAP2K1;MAP2K2;PIK3CB;RAF1;BRAF;ERBB2;PRKCG
hsa04917	Prolactin signaling pathway	http://www.kegg.jp/kegg-bin/show_pathway?hsa04917+10000+1586+207+208+2099+2353+2932+3717+4790+5291+5600+5602+5604+5605+5618+5894+595+6300+6772	70	19	6.36364	2.98571	9.42257e-06	0.000113769	10000;1586;207;208;2099;2353;2932;3717;4790;5291;5600;5602;5604;5605;5618;5894;595;6300;6772	AKT1;AKT2;MAPK10;MAPK12;NFKB1;AKT3;CCND1;JAK2;MAP2K1;MAP2K2;PIK3CB;RAF1;STAT1;ESR1;GSK3B;MAPK11;PRLR;CYP17A1;FOS
hsa05214	Glioma	http://www.kegg.jp/kegg-bin/show_pathway?hsa05214+10000+1019+1021+163688+1643+1950+1956+207+208+3479+5291+5578+5582+5604+5605+5894+595+673+817	71	19	6.45455	2.94366	1.17922e-05	0.000132561	10000;1019;1021;163688;1643;1950;1956;207;208;3479;5291;5578;5582;5604;5605;5894;595;673;817	AKT1;AKT2;CALML6;CDK4;CDK6;DDB2;EGF;EGFR;IGF1;PRKCA;AKT3;CAMK2D;CCND1;MAP2K1;MAP2K2;PIK3CB;RAF1;BRAF;PRKCG
hsa01524	Platinum drug resistance	http://www.kegg.jp/kegg-bin/show_pathway?hsa01524+10000+2064+207+208+2950+2956+332+355+4258+4436+5170+5291+5366+54205+596+637+672+836+841	73	19	6.63636	2.86301	1.81949e-05	0.000169473	10000;2064;207;208;2950;2956;332;355;4258;4436;5170;5291;5366;54205;596;637;672;836;841	AKT1;AKT2;BID;BIRC5;BRCA1;CASP8;CYCS;FAS;MGST2;PDPK1;AKT3;GSTP1;PIK3CB;BCL2;ERBB2;MSH2;MSH6;PMAIP1;CASP3
hsa04658	Th1 and Th2 cell differentiation	http://www.kegg.jp/kegg-bin/show_pathway?hsa04658+2353+2625+3108+3117+3125+3126+3460+3551+3558+3566+3592+3593+3717+4790+4793+5600+5602+6300+6772	92	19	8.36364	2.27174	0.000502339	0.00240827	2353;2625;3108;3117;3125;3126;3460;3551;3558;3566;3592;3593;3717;4790;4793;5600;5602;6300;6772	GATA3;HLA-DMA;HLA-DQA1;HLA-DRB3;IKBKB;MAPK10;MAPK12;NFKB1;NFKBIB;IFNGR2;IL12A;IL4R;JAK2;STAT1;HLA-DRB4;IL12B;IL2;MAPK11;FOS
hsa04750	Inflammatory mediator regulation of TRP channels	http://www.kegg.jp/kegg-bin/show_pathway?hsa04750+115+163688+2150+239+3358+3479+3554+5291+5321+5331+5578+5580+5582+5600+5602+5606+624+6300+817	99	19	9	2.11111	0.00128523	0.00528389	115;163688;2150;239;3358;3479;3554;5291;5321;5331;5578;5580;5582;5600;5602;5606;624;6300;817	BDKRB2;CALML6;F2RL1;IGF1;IL1R1;MAPK10;MAPK12;PLA2G4A;PRKCA;PRKCD;ADCY9;ALOX12;CAMK2D;HTR2C;MAP2K3;PIK3CB;MAPK11;PLCB3;PRKCG
hsa04931	Insulin resistance	http://www.kegg.jp/kegg-bin/show_pathway?hsa04931+10000+10062+207+208+2308+2932+32+3551+3667+4790+5106+5170+5291+5465+5580+5602+5792+6198+6720	107	19	9.72727	1.95327	0.00326982	0.0117139	10000;10062;207;208;2308;2932;32;3551;3667;4790;5106;5170;5291;5465;5580;5602;5792;6198;6720	ACACB;AKT1;AKT2;IKBKB;IRS1;MAPK10;NFKB1;PDPK1;PRKCD;AKT3;PIK3CB;PTPRF;SREBF1;FOXO1;GSK3B;PCK2;RPS6KB1;NR1H3;PPARA
hsa04152	AMPK signaling pathway	http://www.kegg.jp/kegg-bin/show_pathway?hsa04152+10000+10645+148+1978+207+208+2308+31+32+3479+3667+5106+5170+5291+5515+5523+595+6198+6720	120	19	10.9091	1.74167	0.0114982	0.0337694	10000;10645;148;1978;207;208;2308;31;32;3479;3667;5106;5170;5291;5515;5523;595;6198;6720	ACACA;ACACB;AKT1;AKT2;CAMKK2;IGF1;IRS1;PDPK1;PPP2R3A;ADRA1A;AKT3;CCND1;PIK3CB;SREBF1;FOXO1;PCK2;RPS6KB1;PPP2CA;EIF4EBP1
hsa04664	Fc epsilon RI signaling pathway	http://www.kegg.jp/kegg-bin/show_pathway?hsa04664+10000+207+208+3635+4067+5170+5291+5321+5578+5600+5602+5604+5605+5606+5879+5894+6300+695	68	18	6.18182	2.91176	2.34894e-05	0.000206961	10000;207;208;3635;4067;5170;5291;5321;5578;5600;5602;5604;5605;5606;5879;5894;6300;695	AKT1;AKT2;INPP5D;MAPK10;MAPK12;PDPK1;PLA2G4A;PRKCA;RAC1;AKT3;BTK;MAP2K1;MAP2K2;MAP2K3;PIK3CB;RAF1;LYN;MAPK11
hsa05140	Leishmaniasis	http://www.kegg.jp/kegg-bin/show_pathway?hsa05140+2002+2212+2353+3108+3117+3125+3126+3460+3592+3593+3717+4615+4790+4793+5600+6300+6772+718	74	18	6.72727	2.67568	7.96229e-05	0.000499174	2002;2212;2353;3108;3117;3125;3126;3460;3592;3593;3717;4615;4790;4793;5600;6300;6772;718	ELK1;HLA-DMA;HLA-DQA1;HLA-DRB3;MAPK12;MYD88;NFKB1;NFKBIB;C3;IFNGR2;IL12A;JAK2;STAT1;HLA-DRB4;IL12B;MAPK11;FCGR2A;FOS
hsa05221	Acute myeloid leukemia	http://www.kegg.jp/kegg-bin/show_pathway?hsa05221+10000+1050+1978+207+208+3551+4790+5291+5292+5371+5604+5605+5894+595+6198+673+861	66	17	6	2.83333	5.76597e-05	0.000393437	10000;1050;1978;207;208;3551;4790;5291;5292;5371;5604;5605;5894;595;6198;673;861	AKT1;AKT2;CEBPA;IKBKB;NFKB1;PIM1;AKT3;CCND1;MAP2K1;MAP2K2;PIK3CB;PML;RAF1;RUNX1;BRAF;RPS6KB1;EIF4EBP1
hsa05120	Epithelial cell signaling in Helicobacter pylori infection	http://www.kegg.jp/kegg-bin/show_pathway?hsa05120+10392+1956+28964+3551+4067+4790+5058+51382+527+5600+5602+5879+6300+6868+836+9020+998	68	17	6.18182	2.75	8.66485e-05	0.0005231	10392;1956;28964;3551;4067;4790;5058;51382;527;5600;5602;5879;6300;6868;836;9020;998	CDC42;EGFR;IKBKB;MAP3K14;MAPK10;MAPK12;NFKB1;RAC1;ATP6V1D;NOD1;ADAM17;LYN;PAK1;GIT1;MAPK11;ATP6V0C;CASP3
hsa05218	Melanoma	http://www.kegg.jp/kegg-bin/show_pathway?hsa05218+10000+1019+1021+1643+1950+1956+207+208+2247+3479+4286+5291+5604+5605+5894+595+673	72	17	6.54545	2.59722	0.000184975	0.00100503	10000;1019;1021;1643;1950;1956;207;208;2247;3479;4286;5291;5604;5605;5894;595;673	AKT1;AKT2;CDK4;CDK6;DDB2;EGF;EGFR;IGF1;AKT3;CCND1;MAP2K1;MAP2K2;PIK3CB;RAF1;BRAF;FGF2;MITF
hsa04914	Progesterone-mediated oocyte maturation	http://www.kegg.jp/kegg-bin/show_pathway?hsa04914+10000+1017+115+207+208+2771+3479+5241+5291+5600+5602+5604+5894+6300+673+6790+993	99	17	9	1.88889	0.0074096	0.0232262	10000;1017;115;207;208;2771;3479;5241;5291;5600;5602;5604;5894;6300;673;6790;993	AKT1;AKT2;CDC25A;CDK2;IGF1;MAPK10;MAPK12;ADCY9;AKT3;GNAI2;MAP2K1;PIK3CB;RAF1;BRAF;MAPK11;PGR;AURKA
hsa04916	Melanogenesis	http://www.kegg.jp/kegg-bin/show_pathway?hsa04916+115+1499+163688+1856+2771+2932+4254+4286+5331+5578+5582+5604+5605+5894+7855+817+8324	101	17	9.18182	1.85149	0.00905097	0.027836	115;1499;163688;1856;2771;2932;4254;4286;5331;5578;5582;5604;5605;5894;7855;817;8324	CALML6;CTNNB1;DVL2;PRKCA;ADCY9;CAMK2D;FZD5;GNAI2;KITLG;MAP2K1;MAP2K2;RAF1;GSK3B;FZD7;MITF;PLCB3;PRKCG
hsa04370	VEGF signaling pathway	http://www.kegg.jp/kegg-bin/show_pathway?hsa04370+10000+207+208+3791+5291+5321+5578+5582+5600+5604+5605+56848+5879+5894+6300+998	59	16	5.36364	2.98305	4.811e-05	0.000356451	10000;207;208;3791;5291;5321;5578;5582;5600;5604;5605;56848;5879;5894;6300;998	AKT1;AKT2;CDC42;MAPK12;PLA2G4A;PRKCA;RAC1;SPHK2;AKT3;KDR;MAP2K1;MAP2K2;PIK3CB;RAF1;MAPK11;PRKCG
hsa05416	Viral myocarditis	http://www.kegg.jp/kegg-bin/show_pathway?hsa05416+1605+1756+1981+27+3105+3108+3117+3125+3126+3383+54205+5879+595+637+836+841	59	16	5.36364	2.98305	4.811e-05	0.000356451	1605;1756;1981;27;3105;3108;3117;3125;3126;3383;54205;5879;595;637;836;841	BID;CASP8;CYCS;EIF4G1;HLA-DMA;HLA-DQA1;HLA-DRB3;ICAM1;RAC1;CCND1;HLA-A;ABL2;DMD;HLA-DRB4;CASP3;DAG1
hsa05211	Renal cell carcinoma	http://www.kegg.jp/kegg-bin/show_pathway?hsa05211+10000+2034+207+208+405+5058+5062+5291+5604+5605+5879+5894+5906+673+9915+998	69	16	6.27273	2.55072	0.000354331	0.00179675	10000;2034;207;208;405;5058;5062;5291;5604;5605;5879;5894;5906;673;9915;998	AKT1;AKT2;ARNT;ARNT2;CDC42;EPAS1;RAC1;RAP1A;AKT3;MAP2K1;MAP2K2;PAK2;PIK3CB;RAF1;BRAF;PAK1
hsa04662	B cell receptor signaling pathway	http://www.kegg.jp/kegg-bin/show_pathway?hsa04662+10000+207+208+2353+2932+3551+3635+4067+4790+4793+5291+5604+5605+5879+5894+695	71	16	6.45455	2.47887	0.000499263	0.00240827	10000;207;208;2353;2932;3551;3635;4067;4790;4793;5291;5604;5605;5879;5894;695	AKT1;AKT2;IKBKB;INPP5D;NFKB1;NFKBIB;RAC1;AKT3;BTK;MAP2K1;MAP2K2;PIK3CB;RAF1;GSK3B;LYN;FOS
hsa05133	Pertussis	http://www.kegg.jp/kegg-bin/show_pathway?hsa05133+10392+163688+2353+2771+3592+3593+4615+4790+5600+5602+6300+717+718+727+836+840	76	16	6.90909	2.31579	0.0010995	0.00477917	10392;163688;2353;2771;3592;3593;4615;4790;5600;5602;6300;717;718;727;836;840	CALML6;MAPK10;MAPK12;MYD88;NFKB1;C3;GNAI2;IL12A;NOD1;IL12B;CASP7;MAPK11;C2;C5;CASP3;FOS
hsa05220	Chronic myeloid leukemia	http://www.kegg.jp/kegg-bin/show_pathway?hsa05220+10000+1019+1021+1643+207+208+3551+4790+5291+5604+5605+5894+595+613+673+861	76	16	6.90909	2.31579	0.0010995	0.00477917	10000;1019;1021;1643;207;208;3551;4790;5291;5604;5605;5894;595;613;673;861	AKT1;AKT2;CDK4;CDK6;DDB2;IKBKB;NFKB1;AKT3;CCND1;MAP2K1;MAP2K2;PIK3CB;RAF1;RUNX1;BRAF;BCR
hsa05134	Legionellosis	http://www.kegg.jp/kegg-bin/show_pathway?hsa05134+1195+2920+3297+3306+3592+3593+4615+4790+54205+664+718+836+840+841	55	14	5	2.8	0.000294173	0.00154678	1195;2920;3297;3306;3592;3593;4615;4790;54205;664;718;836;840;841	BNIP3;CASP8;CLK1;CXCL2;CYCS;HSPA2;MYD88;NFKB1;C3;IL12A;HSF1;IL12B;CASP7;CASP3
hsa05230	Central carbon metabolism in cancer	http://www.kegg.jp/kegg-bin/show_pathway?hsa05230+10000+1956+2064+207+208+2261+23410+3098+3417+5291+5604+5605+5894+6510	65	14	5.90909	2.36923	0.00175704	0.0069853	10000;1956;2064;207;208;2261;23410;3098;3417;5291;5604;5605;5894;6510	AKT1;AKT2;EGFR;FGFR3;HK1;SIRT3;SLC1A5;AKT3;IDH1;MAP2K1;MAP2K2;PIK3CB;RAF1;ERBB2
hsa04920	Adipocytokine signaling pathway	http://www.kegg.jp/kegg-bin/show_pathway?hsa04920+10000+10645+207+208+2181+32+3551+3667+3717+4790+4793+5106+5465+5602	69	14	6.27273	2.23188	0.00317131	0.0116163	10000;10645;207;208;2181;32;3551;3667;3717;4790;4793;5106;5465;5602	ACACB;AKT1;AKT2;CAMKK2;IKBKB;IRS1;MAPK10;NFKB1;NFKBIB;ACSL3;AKT3;JAK2;PCK2;PPARA
hsa05412	Arrhythmogenic right ventricular cardiomyopathy (ARVC)	http://www.kegg.jp/kegg-bin/show_pathway?hsa05412+1499+1605+1756+1829+2010+3673+3685+3693+4000+488+55799+6546+781+783	72	14	6.54545	2.13889	0.00475417	0.0159779	1499;1605;1756;1829;2010;3673;3685;3693;4000;488;55799;6546;781;783	ATP2A2;CACNA2D3;CTNNB1;EMD;ITGA2;LMNA;CACNA2D1;CACNB2;DMD;DSG2;SLC8A1;ITGAV;DAG1;ITGB5
hsa05410	Hypertrophic cardiomyopathy (HCM)	http://www.kegg.jp/kegg-bin/show_pathway?hsa05410+1605+1636+1756+2010+3479+3673+3685+3693+4000+488+55799+6546+781+783	83	14	7.54545	1.85542	0.0166491	0.0471966	1605;1636;1756;2010;3479;3673;3685;3693;4000;488;55799;6546;781;783	ACE;ATP2A2;CACNA2D3;EMD;IGF1;ITGA2;LMNA;CACNA2D1;CACNB2;DMD;SLC8A1;ITGAV;DAG1;ITGB5
hsa00480	Glutathione metabolism	http://www.kegg.jp/kegg-bin/show_pathway?hsa00480+2730+2876+2877+2882+2936+2950+3417+4258+6240+6241+6723+79017+79094	56	13	5.09091	2.55357	0.00123034	0.00514219	2730;2876;2877;2882;2936;2950;3417;4258;6240;6241;6723;79017;79094	CHAC1;GPX1;GPX2;MGST2;SRM;GGCT;GPX7;GSTP1;IDH1;RRM1;RRM2;GCLM;GSR
hsa04730	Long-term depression	http://www.kegg.jp/kegg-bin/show_pathway?hsa04730+2771+2892+3479+4067+5321+5331+5515+5578+5582+5604+5605+5894+673	60	13	5.45455	2.38333	0.00239755	0.00930477	2771;2892;3479;4067;5321;5331;5515;5578;5582;5604;5605;5894;673	IGF1;PLA2G4A;PRKCA;GNAI2;GRIA3;MAP2K1;MAP2K2;RAF1;BRAF;LYN;PLCB3;PRKCG;PPP2CA
hsa05131	Shigellosis	http://www.kegg.jp/kegg-bin/show_pathway?hsa05131+10094+10392+10552+3551+4790+4793+5600+5602+5879+6300+9474+9475+998	65	13	5.90909	2.2	0.00499716	0.0162907	10094;10392;10552;3551;4790;4793;5600;5602;5879;6300;9474;9475;998	ARPC1A;ATG5;CDC42;IKBKB;MAPK10;MAPK12;NFKB1;NFKBIB;RAC1;ROCK2;ARPC3;NOD1;MAPK11
hsa05321	Inflammatory bowel disease (IBD)	http://www.kegg.jp/kegg-bin/show_pathway?hsa05321+149233+2625+3108+3117+3125+3126+3460+3558+3566+3592+3593+4790+6772	65	13	5.90909	2.2	0.00499716	0.0162907	149233;2625;3108;3117;3125;3126;3460;3558;3566;3592;3593;4790;6772	GATA3;HLA-DMA;HLA-DQA1;HLA-DRB3;NFKB1;IFNGR2;IL12A;IL4R;STAT1;HLA-DRB4;IL12B;IL2;IL23R
hsa04213	Longevity regulating pathway	http://www.kegg.jp/kegg-bin/show_pathway?hsa04213+10000+115+207+208+2308+3306+3479+3667+5291+6198+6647+9474	62	12	5.63636	2.12903	0.00897212	0.027836	10000;115;207;208;2308;3306;3479;3667;5291;6198;6647;9474	AKT1;AKT2;ATG5;HSPA2;IGF1;IRS1;SOD1;ADCY9;AKT3;PIK3CB;FOXO1;RPS6KB1
hsa05150	Staphylococcus aureus infection	http://www.kegg.jp/kegg-bin/show_pathway?hsa05150+1675+2212+2357+3108+3117+3125+3126+3383+717+718+727	56	11	5.09091	2.16071	0.0108402	0.0321265	1675;2212;2357;3108;3117;3125;3126;3383;717;718;727	FPR1;HLA-DMA;HLA-DQA1;HLA-DRB3;ICAM1;C3;HLA-DRB4;C2;C5;CFD;FCGR2A
hsa04215	Apoptosis	http://www.kegg.jp/kegg-bin/show_pathway?hsa04215+332+5366+54205+5602+57448+596+637+836+840+841	32	10	2.90909	3.4375	0.000365126	0.0018035	332;5366;54205;5602;57448;596;637;836;840;841	BID;BIRC5;BIRC6;CASP8;CYCS;MAPK10;BCL2;CASP7;PMAIP1;CASP3
hsa05219	Bladder cancer	http://www.kegg.jp/kegg-bin/show_pathway?hsa05219+1019+1950+1956+2064+2261+5604+5605+5894+595+673	41	10	3.72727	2.68293	0.0029984	0.0111077	1019;1950;1956;2064;2261;5604;5605;5894;595;673	CDK4;EGF;EGFR;FGFR3;CCND1;MAP2K1;MAP2K2;RAF1;BRAF;ERBB2
hsa05014	Amyotrophic lateral sclerosis (ALS)	http://www.kegg.jp/kegg-bin/show_pathway?hsa05014+2876+54205+5600+5606+5879+596+6300+637+6647+836	51	10	4.63636	2.15686	0.0149807	0.0428397	2876;54205;5600;5606;5879;596;6300;637;6647;836	BID;CYCS;GPX1;MAPK12;RAC1;SOD1;MAP2K3;BCL2;MAPK11;CASP3
hsa01523	Antifolate resistance	http://www.kegg.jp/kegg-bin/show_pathway?hsa01523+10057+2348+2356+239+3551+471+4790+8836+9429	31	9	2.81818	3.19355	0.00129666	0.00528389	10057;2348;2356;239;3551;471;4790;8836;9429	FOLR1;GGH;IKBKB;NFKB1;ABCG2;ALOX12;FPGS;ATIC;ABCC5
hsa05143	African trypanosomiasis	http://www.kegg.jp/kegg-bin/show_pathway?hsa05143+2150+3383+355+3592+3593+4615+5331+5578+5582	35	9	3.18182	2.82857	0.00326662	0.0117139	2150;3383;355;3592;3593;4615;5331;5578;5582	F2RL1;FAS;ICAM1;MYD88;PRKCA;IL12A;IL12B;PLCB3;PRKCG
hsa03030	DNA replication	http://www.kegg.jp/kegg-bin/show_pathway?hsa03030+1763+2237+4173+4174+4175+4176+57804+5982+6119	36	9	3.27273	2.75	0.00401211	0.0137679	1763;2237;4173;4174;4175;4176;57804;5982;6119	DNA2;MCM5;POLD4;RFC2;MCM6;RPA3;FEN1;MCM4;MCM7
hsa04960	Aldosterone-regulated sodium reabsorption	http://www.kegg.jp/kegg-bin/show_pathway?hsa04960+2810+3479+3667+5170+5291+5578+5582+6337+6446	37	9	3.36364	2.67568	0.0048842	0.0162475	2810;3479;3667;5170;5291;5578;5582;6337;6446	IGF1;IRS1;PDPK1;PRKCA;SGK1;PIK3CB;SFN;PRKCG;SCNN1A
hsa05330	Allograft rejection	http://www.kegg.jp/kegg-bin/show_pathway?hsa05330+3105+3108+3117+3125+3126+355+3558+3592+3593	38	9	3.45455	2.60526	0.0058966	0.018663	3105;3108;3117;3125;3126;355;3558;3592;3593	FAS;HLA-DMA;HLA-DQA1;HLA-DRB3;HLA-A;IL12A;HLA-DRB4;IL12B;IL2
hsa04940	Type I diabetes mellitus	http://www.kegg.jp/kegg-bin/show_pathway?hsa04940+3105+3108+3117+3125+3126+355+3558+3592+3593	43	9	3.90909	2.30233	0.0135643	0.0391325	3105;3108;3117;3125;3126;355;3558;3592;3593	FAS;HLA-DMA;HLA-DQA1;HLA-DRB3;HLA-A;IL12A;HLA-DRB4;IL12B;IL2
hsa00020	Citrate cycle (TCA cycle)	http://www.kegg.jp/kegg-bin/show_pathway?hsa00020+3417+3420+4190+5091+5106+6392+8801+8803	30	8	2.72727	2.93333	0.00429516	0.0145857	3417;3420;4190;5091;5106;6392;8801;8803	PC;SDHD;SUCLA2;SUCLG2;IDH1;PCK2;IDH3B;MDH1
